# Supplementary material for: Modulation of the Metabiome by Rifaximin in Patients with Cirrhosis and Minimal Hepatic Encephalopathy
Source: PubMed Central journal article supplement (PMC3615021; doi:10.1371/journal.pone.0060042), 2013-04-02

Figure S1

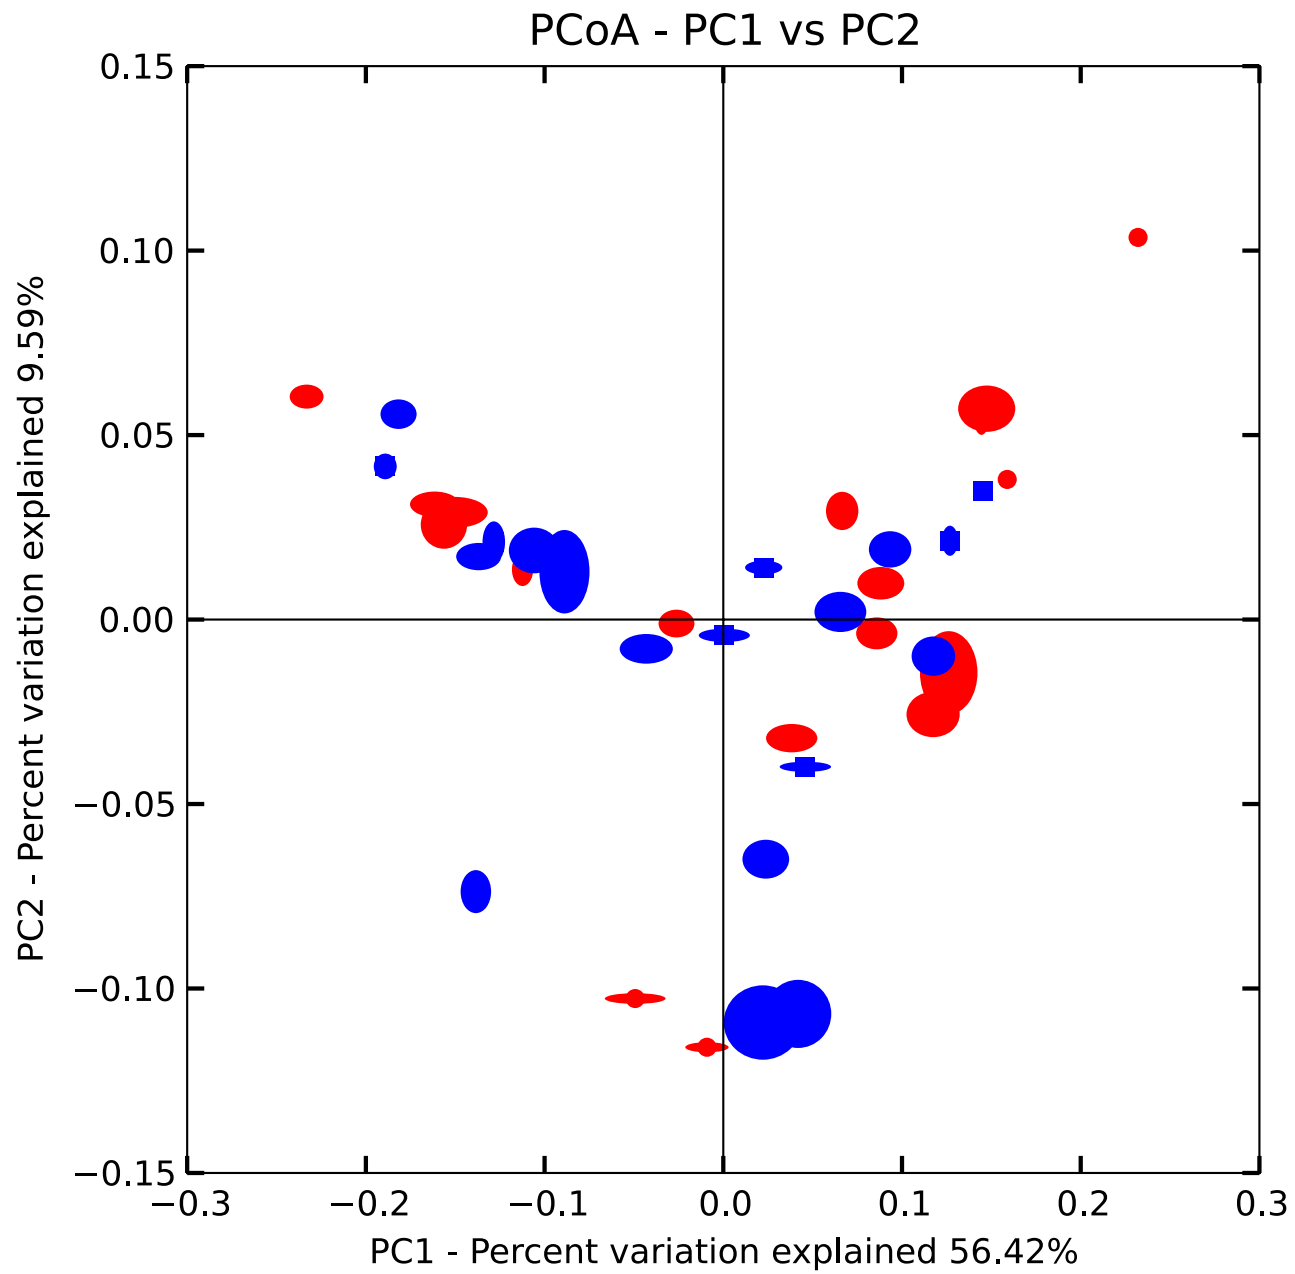

Supplement: pone.0060042.s001.pdf [file pone.0060042.s001.pdf]
