# Supplementary material for: Modulation of the Metabiome by Rifaximin in Patients with Cirrhosis and Minimal Hepatic Encephalopathy
Source: PubMed Central journal article supplement (PMC3615021; doi:10.1371/journal.pone.0060042), 2013-04-02
Supplement: pone.0060042.s003.pdf [file pone.0060042.s003.pdf]

Table S8

| Index | Key1      | Key2                                                                             | Class      |
|-------|-----------|----------------------------------------------------------------------------------|------------|
| 12    | Endotoxin | Endotoxin                                                                        | Clinical   |
| 13    | Taxa_13   | Actinobacteria_Actinobacteria_Actinomycetales_Actinomycetaceae                   | Microbiome |
| 14    | Taxa_14   | Actinobacteria_Actinobacteria_Bifidobacteriales_Bifidobacteriaceae               | Microbiome |
| 15    | Taxa_15   | Actinobacteria_Actinobacteria_Coriobacteriales_Coriobacteriaceae                 | Microbiome |
| 16    | Taxa_16   | Bacteroidetes_Bacteroidia_Bacteroidales_Bacteroidaceae                           | Microbiome |
| 17    | Taxa_17   | Bacteroidetes_Bacteroidia_Bacteroidales_Porphyrromonadaceae                      | Microbiome |
| 18    | Taxa_18   | Bacteroidetes_Bacteroidia_Bacteroidales_Prevotellaceae                           | Microbiome |
| 19    | Taxa_19   | Bacteroidetes_Bacteroidia_Bacteroidales_Rikenellaceae                            | Microbiome |
| 20    | Taxa_20   | Firmicutes_Bacilli_Bacillales_Staphylococcaceae                                  | Microbiome |
| 21    | Taxa_21   | Firmicutes_Bacilli_Lactobacillales_Carnobacteriaceae                             | Microbiome |
| 22    | Taxa_22   | Firmicutes_Bacilli_Lactobacillales_Enterococcaceae                               | Microbiome |
| 23    | Taxa_23   | Firmicutes_Bacilli_Lactobacillales_Lactobacillaceae                              | Microbiome |
| 24    | Taxa_24   | Firmicutes_Bacilli_Lactobacillales_Leuconostocaceae                              | Microbiome |
| 25    | Taxa_25   | Firmicutes_Bacilli_Lactobacillales_Streptococcaceae                              | Microbiome |
| 26    | Taxa_26   | Firmicutes_Clostridia_Clostridiales_Clostridiaceae                               | Microbiome |
| 27    | Taxa_27   | Firmicutes_Clostridia_Clostridiales_Eubacteriaceae                               | Microbiome |
| 28    | Taxa_28   | Firmicutes_Clostridia_Clostridiales_Incertae Sedis XIII                          | Microbiome |
| 29    | Taxa_29   | Firmicutes_Clostridia_Clostridiales_Incertae Sedis XIV                           | Microbiome |
| 30    | Taxa_30   | Firmicutes_Clostridia_Clostridiales_Lachnospiraceae                              | Microbiome |
| 31    | Taxa_31   | Firmicutes_Clostridia_Clostridiales_Peptostreptococcaceae                        | Microbiome |
| 32    | Taxa_32   | Firmicutes_Clostridia_Clostridiales_Ruminococcaceae                              | Microbiome |
| 33    | Taxa_33   | Firmicutes_Clostridia_Clostridiales_Veillonellaceae                              | Microbiome |
| 34    | Taxa_34   | Firmicutes_Erysipelotrichi_Erysipelotrichales_Erysipelotrichaceae                | Microbiome |
| 35    | Taxa_35   | Fusobacteria_Fusobacteria_Fusobacteriales_Fusobacteriaceae                       | Microbiome |
| 36    | Taxa_36   | Proteobacteria_Betaproteobacteria_Burkholderiales_Burkholderiales_incertae_sedis | Microbiome |
| 37    | Taxa_37   | Proteobacteria_Deltaproteobacteria_Desulfovibrionales_Desulfovibrionaceae        | Microbiome |
| 38    | Taxa_38   | Proteobacteria_Gammaproteobacteria_Enterobacteriales_Enterobacteriaceae          | Microbiome |
| 39    | LCU_39    | LCU_0.74727875                                                                   | LC_Urine   |
| 40    | LCU_40    | LCU_0.74927455                                                                   | LC_Urine   |
| 41    | LCU_41    | LCU_0.75                                                                         | LC_Urine   |
| 42    | LCU_42    | LCU_0.7500821                                                                    | LC_Urine   |
| 43    | LCU_43    | LCU_0.75031143                                                                   | LC_Urine   |
| 44    | LCU_44    | LCU_0.7506349                                                                    | LC_Urine   |
| 45    | LCU_45    | LCU_0.75090474                                                                   | LC_Urine   |
| 46    | LCU_46    | LCU_0.752541                                                                     | LC_Urine   |
| 47    | LCU_47    | LCU_0.7537869                                                                    | LC_Urine   |
| 48    | LCU_48    | LCU_0.75457627                                                                   | LC_Urine   |
| 49    | LCU_49    | LCU_0.7553621                                                                    | LC_Urine   |
| 50    | LCU_50    | LCU_0.755918                                                                     | LC_Urine   |
| 51    | LCU_51    | LCU_0.75832564                                                                   | LC_Urine   |
| 52    | LCU_52    | LCU_0.7631207                                                                    | LC_Urine   |
| 53    | LCU_53    | LCU_0.77219296                                                                   | LC_Urine   |
| 54    | LCU_54    | LCU_0.7892223                                                                    | LC_Urine   |
| 55    | LCU_55    | LCU_0.7892727                                                                    | LC_Urine   |
| 56    | LCU_56    | LCU_0.794889                                                                     | LC_Urine   |
| 57    | LCU_57    | LCU_0.7954131                                                                    | LC_Urine   |
| 58    | LCU_58    | LCU_0.79913557                                                                   | LC_Urine   |
| 59    | LCU_59    | LCU_0.7999183                                                                    | LC_Urine   |
| 60    | LCU_60    | LCU_0.8054529                                                                    | LC_Urine   |
| 61    | LCU_61    | LCU_0.817                                                                        | LC_Urine   |
| 62    | LCU_62    | LCU_0.82914275                                                                   | LC_Urine   |
| 63    | LCU_63    | LCU_0.8293199                                                                    | LC_Urine   |
| 64    | LCU_64    | LCU_0.8307142                                                                    | LC_Urine   |
| 65    | LCU_65    | LCU_0.83115387                                                                   | LC_Urine   |
| 66    | LCU_66    | LCU_0.83168626                                                                   | LC_Urine   |
| 67    | LCU_67    | LCU_0.8319464                                                                    | LC_Urine   |
| 68    | LCU_68    | LCU_0.8319555                                                                    | LC_Urine   |
| 69    | LCU_69    | LCU_0.8323829                                                                    | LC_Urine   |
| 70    | LCU_70    | LCU_0.8325651                                                                    | LC_Urine   |
| 71    | LCU_71    | LCU_0.8326785                                                                    | LC_Urine   |

|     |         |                |          |
|-----|---------|----------------|----------|
| 72  | LCU_72  | LCU_0.8326862  | LC_Urine |
| 73  | LCU_73  | LCU_0.8327     | LC_Urine |
| 74  | LCU_74  | LCU_0.8328     | LC_Urine |
| 75  | LCU_75  | LCU_0.83282965 | LC_Urine |
| 76  | LCU_76  | LCU_0.8330195  | LC_Urine |
| 77  | LCU_77  | LCU_0.83307546 | LC_Urine |
| 78  | LCU_78  | LCU_0.833317   | LC_Urine |
| 79  | LCU_79  | LCU_0.8337407  | LC_Urine |
| 80  | LCU_80  | LCU_0.83375007 | LC_Urine |
| 81  | LCU_81  | LCU_0.83388    | LC_Urine |
| 82  | LCU_82  | LCU_0.8339     | LC_Urine |
| 83  | LCU_83  | LCU_0.8339583  | LC_Urine |
| 84  | LCU_84  | LCU_0.8343777  | LC_Urine |
| 85  | LCU_85  | LCU_0.8344     | LC_Urine |
| 86  | LCU_86  | LCU_0.8345966  | LC_Urine |
| 87  | LCU_87  | LCU_0.8347059  | LC_Urine |
| 88  | LCU_88  | LCU_0.8347273  | LC_Urine |
| 89  | LCU_89  | LCU_0.83483326 | LC_Urine |
| 90  | LCU_90  | LCU_0.83488    | LC_Urine |
| 91  | LCU_91  | LCU_0.8349272  | LC_Urine |
| 92  | LCU_92  | LCU_0.8349455  | LC_Urine |
| 93  | LCU_93  | LCU_0.8351154  | LC_Urine |
| 94  | LCU_94  | LCU_0.8352545  | LC_Urine |
| 95  | LCU_95  | LCU_0.8354468  | LC_Urine |
| 96  | LCU_96  | LCU_0.8355556  | LC_Urine |
| 97  | LCU_97  | LCU_0.8356512  | LC_Urine |
| 98  | LCU_98  | LCU_0.8359039  | LC_Urine |
| 99  | LCU_99  | LCU_0.83702224 | LC_Urine |
| 100 | LCU_100 | LCU_0.83703697 | LC_Urine |
| 101 | LCU_101 | LCU_0.8375193  | LC_Urine |
| 102 | LCU_102 | LCU_0.87418616 | LC_Urine |
| 103 | LCU_103 | LCU_0.8745832  | LC_Urine |
| 104 | LCU_104 | LCU_0.87646544 | LC_Urine |
| 105 | LCU_105 | LCU_0.8787965  | LC_Urine |
| 106 | LCU_106 | LCU_0.87987924 | LC_Urine |
| 107 | LCU_107 | LCU_0.8805     | LC_Urine |
| 108 | LCU_108 | LCU_0.8829792  | LC_Urine |
| 109 | LCU_109 | LCU_0.88521665 | LC_Urine |
| 110 | LCU_110 | LCU_0.8865102  | LC_Urine |
| 111 | LCU_111 | LCU_0.89766026 | LC_Urine |
| 112 | LCU_112 | LCU_0.9008372  | LC_Urine |
| 113 | LCU_113 | LCU_0.9008372  | LC_Urine |
| 114 | LCU_114 | LCU_0.9198982  | LC_Urine |
| 115 | LCU_115 | LCU_0.91999996 | LC_Urine |
| 116 | LCU_116 | LCU_0.9200508  | LC_Urine |
| 117 | LCU_117 | LCU_0.9251185  | LC_Urine |
| 118 | LCU_118 | LCU_0.9254614  | LC_Urine |
| 119 | LCU_119 | LCU_0.9260754  | LC_Urine |
| 120 | LCU_120 | LCU_0.926173   | LC_Urine |
| 121 | LCU_121 | LCU_0.9263409  | LC_Urine |
| 122 | LCU_122 | LCU_0.9269811  | LC_Urine |
| 123 | LCU_123 | LCU_0.9269999  | LC_Urine |
| 124 | LCU_124 | LCU_0.9306362  | LC_Urine |
| 125 | LCU_125 | LCU_0.93258536 | LC_Urine |
| 126 | LCU_126 | LCU_0.9426347  | LC_Urine |
| 127 | LCU_127 | LCU_0.9429642  | LC_Urine |
| 128 | LCU_128 | LCU_0.94850004 | LC_Urine |
| 129 | LCU_129 | LCU_0.9499769  | LC_Urine |
| 130 | LCU_130 | LCU_0.95090467 | LC_Urine |
| 131 | LCU_131 | LCU_0.9534468  | LC_Urine |
| 132 | LCU_132 | LCU_0.96072096 | LC_Urine |
| 133 | LCU_133 | LCU_0.9618981  | LC_Urine |

|     |         |                |          |
|-----|---------|----------------|----------|
| 134 | LCU_134 | LCU_0.9632633  | LC_Urine |
| 135 | LCU_135 | LCU_0.9651641  | LC_Urine |
| 136 | LCU_136 | LCU_0.97273076 | LC_Urine |
| 137 | LCU_137 | LCU_0.985805   | LC_Urine |
| 138 | LCU_138 | LCU_0.9963092  | LC_Urine |
| 139 | LCU_139 | LCU_1.0073206  | LC_Urine |
| 140 | LCU_140 | LCU_1.015354   | LC_Urine |
| 141 | LCU_141 | LCU_1.0740485  | LC_Urine |
| 142 | LCU_142 | LCU_1.1610193  | LC_Urine |
| 143 | LCU_143 | LCU_1.2602726  | LC_Urine |
| 144 | LCU_144 | LCU_1.2623726  | LC_Urine |
| 145 | LCU_145 | LCU_1.267737   | LC_Urine |
| 146 | LCU_146 | LCU_1.2687     | LC_Urine |
| 147 | LCU_147 | LCU_1.2778     | LC_Urine |
| 148 | LCU_148 | LCU_1.2788914  | LC_Urine |
| 149 | LCU_149 | LCU_1.2788914  | LC_Urine |
| 150 | LCU_150 | LCU_1.279109   | LC_Urine |
| 151 | LCU_151 | LCU_1.280451   | LC_Urine |
| 152 | LCU_152 | LCU_1.2930889  | LC_Urine |
| 153 | LCU_153 | LCU_1.3214036  | LC_Urine |
| 154 | LCU_154 | LCU_1.3219131  | LC_Urine |
| 155 | LCU_155 | LCU_1.3337923  | LC_Urine |
| 156 | LCU_156 | LCU_1.3610377  | LC_Urine |
| 157 | LCU_157 | LCU_1.3614264  | LC_Urine |
| 158 | LCU_158 | LCU_1.3694761  | LC_Urine |
| 159 | LCU_159 | LCU_1.3711303  | LC_Urine |
| 160 | LCU_160 | LCU_1.3832453  | LC_Urine |
| 161 | LCU_161 | LCU_1.3952246  | LC_Urine |
| 162 | LCU_162 | LCU_1.4084749  | LC_Urine |
| 163 | LCU_163 | LCU_1.4326079  | LC_Urine |
| 164 | LCU_164 | LCU_1.4340222  | LC_Urine |
| 165 | LCU_165 | LCU_1.4741818  | LC_Urine |
| 166 | LCU_166 | LCU_1.4764813  | LC_Urine |
| 167 | LCU_167 | LCU_1.4820741  | LC_Urine |
| 168 | LCU_168 | LCU_1.4830698  | LC_Urine |
| 169 | LCU_169 | LCU_1.4837799  | LC_Urine |
| 170 | LCU_170 | LCU_1.4842181  | LC_Urine |
| 171 | LCU_171 | LCU_1.4860667  | LC_Urine |
| 172 | LCU_172 | LCU_1.487729   | LC_Urine |
| 173 | LCU_173 | LCU_1.4877455  | LC_Urine |
| 174 | LCU_174 | LCU_1.4883584  | LC_Urine |
| 175 | LCU_175 | LCU_1.490586   | LC_Urine |
| 176 | LCU_176 | LCU_1.4934629  | LC_Urine |
| 177 | LCU_177 | LCU_1.5206554  | LC_Urine |
| 178 | LCU_178 | LCU_1.5267242  | LC_Urine |
| 179 | LCU_179 | LCU_1.5351628  | LC_Urine |
| 180 | LCU_180 | LCU_1.5480783  | LC_Urine |
| 181 | LCU_181 | LCU_1.5799284  | LC_Urine |
| 182 | LCU_182 | LCU_1.5823072  | LC_Urine |
| 183 | LCU_183 | LCU_1.582964   | LC_Urine |
| 184 | LCU_184 | LCU_1.5838695  | LC_Urine |
| 185 | LCU_185 | LCU_1.5839664  | LC_Urine |
| 186 | LCU_186 | LCU_1.5841163  | LC_Urine |
| 187 | LCU_187 | LCU_1.5846099  | LC_Urine |
| 188 | LCU_188 | LCU_1.5855306  | LC_Urine |
| 189 | LCU_189 | LCU_1.5857404  | LC_Urine |
| 190 | LCU_190 | LCU_1.5861996  | LC_Urine |
| 191 | LCU_191 | LCU_1.5864478  | LC_Urine |
| 192 | LCU_192 | LCU_1.5866978  | LC_Urine |
| 193 | LCU_193 | LCU_1.5871603  | LC_Urine |
| 194 | LCU_194 | LCU_1.5890453  | LC_Urine |
| 195 | LCU_195 | LCU_1.5894725  | LC_Urine |

|     |         |               |          |
|-----|---------|---------------|----------|
| 196 | LCU_196 | LCU_1.5896667 | LC_Urine |
| 197 | LCU_197 | LCU_1.5949998 | LC_Urine |
| 198 | LCU_198 | LCU_1.5974073 | LC_Urine |
| 199 | LCU_199 | LCU_1.6054822 | LC_Urine |
| 200 | LCU_200 | LCU_1.6100588 | LC_Urine |
| 201 | LCU_201 | LCU_1.6136792 | LC_Urine |
| 202 | LCU_202 | LCU_1.6173636 | LC_Urine |
| 203 | LCU_203 | LCU_1.6188293 | LC_Urine |
| 204 | LCU_204 | LCU_1.6190517 | LC_Urine |
| 205 | LCU_205 | LCU_1.6257869 | LC_Urine |
| 206 | LCU_206 | LCU_1.625981  | LC_Urine |
| 207 | LCU_207 | LCU_1.6272712 | LC_Urine |
| 208 | LCU_208 | LCU_1.6276001 | LC_Urine |
| 209 | LCU_209 | LCU_1.6280836 | LC_Urine |
| 210 | LCU_210 | LCU_1.6297739 | LC_Urine |
| 211 | LCU_211 | LCU_1.6349598 | LC_Urine |
| 212 | LCU_212 | LCU_1.6454388 | LC_Urine |
| 213 | LCU_213 | LCU_1.658018  | LC_Urine |
| 214 | LCU_214 | LCU_1.6587019 | LC_Urine |
| 215 | LCU_215 | LCU_1.6646327 | LC_Urine |
| 216 | LCU_216 | LCU_1.6919421 | LC_Urine |
| 217 | LCU_217 | LCU_1.7066609 | LC_Urine |
| 218 | LCU_218 | LCU_1.7088137 | LC_Urine |
| 219 | LCU_219 | LCU_1.7386442 | LC_Urine |
| 220 | LCU_220 | LCU_1.7901965 | LC_Urine |
| 221 | LCU_221 | LCU_1.811508  | LC_Urine |
| 222 | LCU_222 | LCU_1.8660964 | LC_Urine |
| 223 | LCU_223 | LCU_1.8672792 | LC_Urine |
| 224 | LCU_224 | LCU_1.8683732 | LC_Urine |
| 225 | LCU_225 | LCU_1.9070834 | LC_Urine |
| 226 | LCU_226 | LCU_1.9699509 | LC_Urine |
| 227 | LCU_227 | LCU_1.9724256 | LC_Urine |
| 228 | LCU_228 | LCU_1.9781467 | LC_Urine |
| 229 | LCU_229 | LCU_2.0142667 | LC_Urine |
| 230 | LCU_230 | LCU_2.031731  | LC_Urine |
| 231 | LCU_231 | LCU_2.033434  | LC_Urine |
| 232 | LCU_232 | LCU_2.035491  | LC_Urine |
| 233 | LCU_233 | LCU_2.1562004 | LC_Urine |
| 234 | LCU_234 | LCU_2.1580324 | LC_Urine |
| 235 | LCU_235 | LCU_2.1584098 | LC_Urine |
| 236 | LCU_236 | LCU_2.2056663 | LC_Urine |
| 237 | LCU_237 | LCU_2.2079535 | LC_Urine |
| 238 | LCU_238 | LCU_2.341478  | LC_Urine |
| 239 | LCU_239 | LCU_2.3936396 | LC_Urine |
| 240 | LCU_240 | LCU_2.39485   | LC_Urine |
| 241 | LCU_241 | LCU_2.3964212 | LC_Urine |
| 242 | LCU_242 | LCU_2.6387966 | LC_Urine |
| 243 | LCU_243 | LCU_2.6391184 | LC_Urine |
| 244 | LCU_244 | LCU_2.6424997 | LC_Urine |
| 245 | LCU_245 | LCU_2.645761  | LC_Urine |
| 246 | LCU_246 | LCU_2.6595964 | LC_Urine |
| 247 | LCU_247 | LCU_2.6604998 | LC_Urine |
| 248 | LCU_248 | LCU_2.7091873 | LC_Urine |
| 249 | LCU_249 | LCU_2.7255743 | LC_Urine |
| 250 | LCU_250 | LCU_2.7548604 | LC_Urine |
| 251 | LCU_251 | LCU_2.7589827 | LC_Urine |
| 252 | LCU_252 | LCU_2.7684414 | LC_Urine |
| 253 | LCU_253 | LCU_2.802426  | LC_Urine |
| 254 | LCU_254 | LCU_2.8698545 | LC_Urine |
| 255 | LCU_255 | LCU_2.9481251 | LC_Urine |
| 256 | LCU_256 | LCU_3.0346272 | LC_Urine |
| 257 | LCU_257 | LCU_3.0549347 | LC_Urine |

|     |         |               |          |
|-----|---------|---------------|----------|
| 258 | LCU_258 | LCU_3.1949997 | LC_Urine |
| 259 | LCU_259 | LCU_3.2131965 | LC_Urine |
| 260 | LCU_260 | LCU_3.299293  | LC_Urine |
| 261 | LCU_261 | LCU_3.5435    | LC_Urine |
| 262 | LCU_262 | LCU_3.7233748 | LC_Urine |
| 263 | LCU_263 | LCU_4.438754  | LC_Urine |
| 264 | LCU_264 | LCU_4.4903407 | LC_Urine |
| 265 | LCU_265 | LCU_4.6014996 | LC_Urine |
| 266 | LCU_266 | LCU_4.6609545 | LC_Urine |
| 267 | LCU_267 | LCU_4.7638125 | LC_Urine |
| 268 | LCU_268 | LCU_4.765773  | LC_Urine |
| 269 | LCU_269 | LCU_4.765911  | LC_Urine |
| 270 | LCU_270 | LCU_4.766158  | LC_Urine |
| 271 | LCU_271 | LCU_4.7718625 | LC_Urine |
| 272 | LCU_272 | LCU_4.7718625 | LC_Urine |
| 273 | LCU_273 | LCU_4.8621707 | LC_Urine |
| 274 | LCU_274 | LCU_4.908667  | LC_Urine |
| 275 | LCU_275 | LCU_4.9140444 | LC_Urine |
| 276 | LCU_276 | LCU_4.916358  | LC_Urine |
| 277 | LCU_277 | LCU_4.9432173 | LC_Urine |
| 278 | LCU_278 | LCU_4.94539   | LC_Urine |
| 279 | LCU_279 | LCU_4.9456315 | LC_Urine |
| 280 | LCU_280 | LCU_4.9519105 | LC_Urine |
| 281 | LCU_281 | LCU_5.152652  | LC_Urine |
| 282 | LCU_282 | LCU_5.154371  | LC_Urine |
| 283 | LCU_283 | LCU_5.154371  | LC_Urine |
| 284 | LCU_284 | LCU_5.1904693 | LC_Urine |
| 285 | LCU_285 | LCU_5.1935616 | LC_Urine |
| 286 | LCU_286 | LCU_5.1938496 | LC_Urine |
| 287 | LCU_287 | LCU_5.1945767 | LC_Urine |
| 288 | LCU_288 | LCU_5.1948285 | LC_Urine |
| 289 | LCU_289 | LCU_5.199934  | LC_Urine |
| 290 | LCU_290 | LCU_5.2008705 | LC_Urine |
| 291 | LCU_291 | LCU_5.2108912 | LC_Urine |
| 292 | LCU_292 | LCU_5.2199836 | LC_Urine |
| 293 | LCU_293 | LCU_5.2523804 | LC_Urine |
| 294 | LCU_294 | LCU_5.26583   | LC_Urine |
| 295 | LCU_295 | LCU_5.3574414 | LC_Urine |
| 296 | LCU_296 | LCU_5.4184885 | LC_Urine |
| 297 | LCU_297 | LCU_5.4312587 | LC_Urine |
| 298 | LCU_298 | LCU_5.4375343 | LC_Urine |
| 299 | LCU_299 | LCU_5.4512296 | LC_Urine |
| 300 | LCU_300 | LCU_5.4528127 | LC_Urine |
| 301 | LCU_301 | LCU_5.481099  | LC_Urine |
| 302 | LCU_302 | LCU_5.483327  | LC_Urine |
| 303 | LCU_303 | LCU_5.485268  | LC_Urine |
| 304 | LCU_304 | LCU_5.5079618 | LC_Urine |
| 305 | LCU_305 | LCU_5.508163  | LC_Urine |
| 306 | LCU_306 | LCU_5.5625243 | LC_Urine |
| 307 | LCU_307 | LCU_5.5652394 | LC_Urine |
| 308 | LCU_308 | LCU_5.568741  | LC_Urine |
| 309 | LCU_309 | LCU_5.569786  | LC_Urine |
| 310 | LCU_310 | LCU_5.611671  | LC_Urine |
| 311 | LCU_311 | LCU_5.6127157 | LC_Urine |
| 312 | LCU_312 | LCU_5.6135116 | LC_Urine |
| 313 | LCU_313 | LCU_5.6304255 | LC_Urine |
| 314 | LCU_314 | LCU_5.6408687 | LC_Urine |
| 315 | LCU_315 | LCU_5.640949  | LC_Urine |
| 316 | LCU_316 | LCU_5.6759615 | LC_Urine |
| 317 | LCU_317 | LCU_5.7831793 | LC_Urine |
| 318 | LCU_318 | LCU_5.7832956 | LC_Urine |
| 319 | LCU_319 | LCU_5.78345   | LC_Urine |

|     |         |               |          |
|-----|---------|---------------|----------|
| 320 | LCU_320 | LCU_5.7836595 | LC_Urine |
| 321 | LCU_321 | LCU_5.7961636 | LC_Urine |
| 322 | LCU_322 | LCU_5.797979  | LC_Urine |
| 323 | LCU_323 | LCU_5.8026514 | LC_Urine |
| 324 | LCU_324 | LCU_5.861306  | LC_Urine |
| 325 | LCU_325 | LCU_5.9078    | LC_Urine |
| 326 | LCU_326 | LCU_5.9280505 | LC_Urine |
| 327 | LCU_327 | LCU_5.98149   | LC_Urine |
| 328 | LCU_328 | LCU_6.0272217 | LC_Urine |
| 329 | LCU_329 | LCU_6.062381  | LC_Urine |
| 330 | LCU_330 | LCU_6.070278  | LC_Urine |
| 331 | LCU_331 | LCU_6.07372   | LC_Urine |
| 332 | LCU_332 | LCU_6.077568  | LC_Urine |
| 333 | LCU_333 | LCU_6.086763  | LC_Urine |
| 334 | LCU_334 | LCU_6.09863   | LC_Urine |
| 335 | LCU_335 | LCU_6.1219807 | LC_Urine |
| 336 | LCU_336 | LCU_6.122539  | LC_Urine |
| 337 | LCU_337 | LCU_6.1241083 | LC_Urine |
| 338 | LCU_338 | LCU_6.1274805 | LC_Urine |
| 339 | LCU_339 | LCU_6.136942  | LC_Urine |
| 340 | LCU_340 | LCU_6.1466746 | LC_Urine |
| 341 | LCU_341 | LCU_6.213277  | LC_Urine |
| 342 | LCU_342 | LCU_6.286322  | LC_Urine |
| 343 | LCU_343 | LCU_6.352967  | LC_Urine |
| 344 | LCU_344 | LCU_6.3543324 | LC_Urine |
| 345 | LCU_345 | LCU_6.4223166 | LC_Urine |
| 346 | LCU_346 | LCU_6.4357796 | LC_Urine |
| 347 | LCU_347 | LCU_6.4629674 | LC_Urine |
| 348 | LCU_348 | LCU_6.4682045 | LC_Urine |
| 349 | LCU_349 | LCU_6.5068154 | LC_Urine |
| 350 | LCU_350 | LCU_6.6587186 | LC_Urine |
| 351 | LCU_351 | LCU_6.681644  | LC_Urine |
| 352 | LCU_352 | LCU_6.7164106 | LC_Urine |
| 353 | LCU_353 | LCU_6.7721176 | LC_Urine |
| 354 | LCU_354 | LCU_6.7893596 | LC_Urine |
| 355 | LCU_355 | LCU_6.7908297 | LC_Urine |
| 356 | LCU_356 | LCU_6.805694  | LC_Urine |
| 357 | LCU_357 | LCU_6.8114405 | LC_Urine |
| 358 | LCU_358 | LCU_6.8166566 | LC_Urine |
| 359 | LCU_359 | LCU_6.819189  | LC_Urine |
| 360 | LCU_360 | LCU_6.853128  | LC_Urine |
| 361 | LCU_361 | LCU_6.870501  | LC_Urine |
| 362 | LCU_362 | LCU_6.8725004 | LC_Urine |
| 363 | LCU_363 | LCU_6.8748856 | LC_Urine |
| 364 | LCU_364 | LCU_6.8752184 | LC_Urine |
| 365 | LCU_365 | LCU_6.8756604 | LC_Urine |
| 366 | LCU_366 | LCU_6.876167  | LC_Urine |
| 367 | LCU_367 | LCU_6.876308  | LC_Urine |
| 368 | LCU_368 | LCU_6.876892  | LC_Urine |
| 369 | LCU_369 | LCU_6.8770485 | LC_Urine |
| 370 | LCU_370 | LCU_6.877236  | LC_Urine |
| 371 | LCU_371 | LCU_6.877356  | LC_Urine |
| 372 | LCU_372 | LCU_6.87739   | LC_Urine |
| 373 | LCU_373 | LCU_6.8775887 | LC_Urine |
| 374 | LCU_374 | LCU_6.8777957 | LC_Urine |
| 375 | LCU_375 | LCU_6.877911  | LC_Urine |
| 376 | LCU_376 | LCU_6.8780837 | LC_Urine |
| 377 | LCU_377 | LCU_6.878209  | LC_Urine |
| 378 | LCU_378 | LCU_6.8783264 | LC_Urine |
| 379 | LCU_379 | LCU_6.8790364 | LC_Urine |
| 380 | LCU_380 | LCU_6.879132  | LC_Urine |
| 381 | LCU_381 | LCU_6.8791623 | LC_Urine |

|     |         |               |          |
|-----|---------|---------------|----------|
| 382 | LCU_382 | LCU_6.880388  | LC_Urine |
| 383 | LCU_383 | LCU_6.8810234 | LC_Urine |
| 384 | LCU_384 | LCU_6.8816586 | LC_Urine |
| 385 | LCU_385 | LCU_6.882289  | LC_Urine |
| 386 | LCU_386 | LCU_6.8835697 | LC_Urine |
| 387 | LCU_387 | LCU_6.9340515 | LC_Urine |
| 388 | LCU_388 | LCU_6.9370008 | LC_Urine |
| 389 | LCU_389 | LCU_6.9504914 | LC_Urine |
| 390 | LCU_390 | LCU_6.9522223 | LC_Urine |
| 391 | LCU_391 | LCU_6.9522963 | LC_Urine |
| 392 | LCU_392 | LCU_6.954574  | LC_Urine |
| 393 | LCU_393 | LCU_6.9557014 | LC_Urine |
| 394 | LCU_394 | LCU_6.9559526 | LC_Urine |
| 395 | LCU_395 | LCU_6.9560647 | LC_Urine |
| 396 | LCU_396 | LCU_6.956492  | LC_Urine |
| 397 | LCU_397 | LCU_6.957068  | LC_Urine |
| 398 | LCU_398 | LCU_6.957544  | LC_Urine |
| 399 | LCU_399 | LCU_6.958148  | LC_Urine |
| 400 | LCU_400 | LCU_6.9584837 | LC_Urine |
| 401 | LCU_401 | LCU_6.9586844 | LC_Urine |
| 402 | LCU_402 | LCU_6.9588256 | LC_Urine |
| 403 | LCU_403 | LCU_6.959577  | LC_Urine |
| 404 | LCU_404 | LCU_6.961377  | LC_Urine |
| 405 | LCU_405 | LCU_6.962525  | LC_Urine |
| 406 | LCU_406 | LCU_6.965726  | LC_Urine |
| 407 | LCU_407 | LCU_6.969448  | LC_Urine |
| 408 | LCU_408 | LCU_6.9710565 | LC_Urine |
| 409 | LCU_409 | LCU_6.972352  | LC_Urine |
| 410 | LCU_410 | LCU_6.9731226 | LC_Urine |
| 411 | LCU_411 | LCU_6.973138  | LC_Urine |
| 412 | LCU_412 | LCU_6.9741073 | LC_Urine |
| 413 | LCU_413 | LCU_6.976765  | LC_Urine |
| 414 | LCU_414 | LCU_6.978379  | LC_Urine |
| 415 | LCU_415 | LCU_6.9786825 | LC_Urine |
| 416 | LCU_416 | LCU_7.013635  | LC_Urine |
| 417 | LCU_417 | LCU_7.0158486 | LC_Urine |
| 418 | LCU_418 | LCU_7.0160627 | LC_Urine |
| 419 | LCU_419 | LCU_7.037093  | LC_Urine |
| 420 | LCU_420 | LCU_7.037522  | LC_Urine |
| 421 | LCU_421 | LCU_7.040122  | LC_Urine |
| 422 | LCU_422 | LCU_7.0494294 | LC_Urine |
| 423 | LCU_423 | LCU_7.0498953 | LC_Urine |
| 424 | LCU_424 | LCU_7.071801  | LC_Urine |
| 425 | LCU_425 | LCU_7.0998015 | LC_Urine |
| 426 | LCU_426 | LCU_7.100242  | LC_Urine |
| 427 | LCU_427 | LCU_7.100775  | LC_Urine |
| 428 | LCU_428 | LCU_7.1207232 | LC_Urine |
| 429 | LCU_429 | LCU_7.1270194 | LC_Urine |
| 430 | LCU_430 | LCU_7.211143  | LC_Urine |
| 431 | LCU_431 | LCU_7.21354   | LC_Urine |
| 432 | LCU_432 | LCU_7.244039  | LC_Urine |
| 433 | LCU_433 | LCU_7.244427  | LC_Urine |
| 434 | LCU_434 | LCU_7.3495092 | LC_Urine |
| 435 | LCU_435 | LCU_7.3521667 | LC_Urine |
| 436 | LCU_436 | LCU_7.352296  | LC_Urine |
| 437 | LCU_437 | LCU_7.365115  | LC_Urine |
| 438 | LCU_438 | LCU_7.4260163 | LC_Urine |
| 439 | LCU_439 | LCU_7.434476  | LC_Urine |
| 440 | LCU_440 | LCU_7.4347143 | LC_Urine |
| 441 | LCU_441 | LCU_7.491035  | LC_Urine |
| 442 | LCU_442 | LCU_7.499751  | LC_Urine |
| 443 | LCU_443 | LCU_7.542869  | LC_Urine |

|     |         |               |          |
|-----|---------|---------------|----------|
| 444 | LCU_444 | LCU_7.5485697 | LC_Urine |
| 445 | LCU_445 | LCU_7.5485697 | LC_Urine |
| 446 | LCU_446 | LCU_7.555021  | LC_Urine |
| 447 | LCU_447 | LCU_7.5700464 | LC_Urine |
| 448 | LCU_448 | LCU_7.5703554 | LC_Urine |
| 449 | LCU_449 | LCU_7.575164  | LC_Urine |
| 450 | LCU_450 | LCU_7.57579   | LC_Urine |
| 451 | LCU_451 | LCU_7.6323013 | LC_Urine |
| 452 | LCU_452 | LCU_7.6323013 | LC_Urine |
| 453 | LCU_453 | LCU_7.6389775 | LC_Urine |
| 454 | LCU_454 | LCU_7.725359  | LC_Urine |
| 455 | LCU_455 | LCU_7.7751837 | LC_Urine |
| 456 | LCU_456 | LCU_7.77587   | LC_Urine |
| 457 | LCU_457 | LCU_7.8139033 | LC_Urine |
| 458 | LCU_458 | LCU_7.8139033 | LC_Urine |
| 459 | LCU_459 | LCU_7.8355966 | LC_Urine |
| 460 | LCU_460 | LCU_7.8360004 | LC_Urine |
| 461 | LCU_461 | LCU_7.8384027 | LC_Urine |
| 462 | LCU_462 | LCU_7.912367  | LC_Urine |
| 463 | LCU_463 | LCU_7.9271274 | LC_Urine |
| 464 | LCU_464 | LCU_7.9561768 | LC_Urine |
| 465 | LCU_465 | LCU_7.9772396 | LC_Urine |
| 466 | LCU_466 | LCU_7.989882  | LC_Urine |
| 467 | LCU_467 | LCU_8.005605  | LC_Urine |
| 468 | LCU_468 | LCU_8.005952  | LC_Urine |
| 469 | LCU_469 | LCU_8.007562  | LC_Urine |
| 470 | LCU_470 | LCU_8.026418  | LC_Urine |
| 471 | LCU_471 | LCU_8.117298  | LC_Urine |
| 472 | LCU_472 | LCU_8.121244  | LC_Urine |
| 473 | LCU_473 | LCU_8.130238  | LC_Urine |
| 474 | LCU_474 | LCU_8.162313  | LC_Urine |
| 475 | LCU_475 | LCU_8.255415  | LC_Urine |
| 476 | LCU_476 | LCU_8.2583    | LC_Urine |
| 477 | LCU_477 | LCU_8.271348  | LC_Urine |
| 478 | LCU_478 | LCU_8.379254  | LC_Urine |
| 479 | LCU_479 | LCU_8.400715  | LC_Urine |
| 480 | LCU_480 | LCU_8.449583  | LC_Urine |
| 481 | LCU_481 | LCU_8.452721  | LC_Urine |
| 482 | LCU_482 | LCU_8.522912  | LC_Urine |
| 483 | LCU_483 | LCU_8.5915365 | LC_Urine |
| 484 | LCU_484 | LCU_8.619595  | LC_Urine |
| 485 | LCU_485 | LCU_8.698693  | LC_Urine |
| 486 | LCU_486 | LCU_8.710734  | LC_Urine |
| 487 | LCU_487 | LCU_8.722143  | LC_Urine |
| 488 | LCU_488 | LCU_8.722477  | LC_Urine |
| 489 | LCU_489 | LCU_8.722596  | LC_Urine |
| 490 | LCU_490 | LCU_8.738303  | LC_Urine |
| 491 | LCU_491 | LCU_8.770103  | LC_Urine |
| 492 | LCU_492 | LCU_8.816201  | LC_Urine |
| 493 | LCU_493 | LCU_8.816201  | LC_Urine |
| 494 | LCU_494 | LCU_8.839639  | LC_Urine |
| 495 | LCU_495 | LCU_8.840083  | LC_Urine |
| 496 | LCU_496 | LCU_8.847407  | LC_Urine |
| 497 | LCU_497 | LCU_8.885116  | LC_Urine |
| 498 | LCU_498 | LCU_8.907862  | LC_Urine |
| 499 | LCU_499 | LCU_8.908082  | LC_Urine |
| 500 | LCU_500 | LCU_8.938262  | LC_Urine |
| 501 | LCU_501 | LCU_8.945626  | LC_Urine |
| 502 | LCU_502 | LCU_8.972689  | LC_Urine |
| 503 | LCU_503 | LCU_8.973355  | LC_Urine |
| 504 | LCU_504 | LCU_8.9947    | LC_Urine |
| 505 | LCU_505 | LCU_8.9947    | LC_Urine |



|     |         |                |          |
|-----|---------|----------------|----------|
| 506 | LCU_506 | LCU_8.997327   | LC_Urine |
| 507 | LCU_507 | LCU_9.024211   | LC_Urine |
| 508 | LCU_508 | LCU_9.074976   | LC_Urine |
| 509 | LCU_509 | LCU_9.101583   | LC_Urine |
| 510 | LCU_510 | LCU_9.139768   | LC_Urine |
| 511 | LCU_511 | LCU_9.140408   | LC_Urine |
| 512 | LCU_512 | LCU_9.173713   | LC_Urine |
| 513 | LCU_513 | LCU_9.2345085  | LC_Urine |
| 514 | LCU_514 | LCU_9.236141   | LC_Urine |
| 515 | LCU_515 | LCU_9.371733   | LC_Urine |
| 516 | LCU_516 | LCU_9.379313   | LC_Urine |
| 517 | LCU_517 | LCU_9.464517   | LC_Urine |
| 518 | LCU_518 | LCU_9.46946    | LC_Urine |
| 519 | LCU_519 | LCU_9.470442   | LC_Urine |
| 520 | LCU_520 | LCU_9.470485   | LC_Urine |
| 521 | LCU_521 | LCU_9.50072    | LC_Urine |
| 522 | LCU_522 | LCU_9.561614   | LC_Urine |
| 523 | LCU_523 | LCU_9.578851   | LC_Urine |
| 524 | LCU_524 | LCU_9.645567   | LC_Urine |
| 525 | LCU_525 | LCU_9.720254   | LC_Urine |
| 526 | LCU_526 | LCU_9.751905   | LC_Urine |
| 527 | LCU_527 | LCU_9.773757   | LC_Urine |
| 528 | LCU_528 | LCU_9.774888   | LC_Urine |
| 529 | LCU_529 | LCU_9.788501   | LC_Urine |
| 530 | LCU_530 | LCU_9.994791   | LC_Urine |
| 531 | LCU_531 | LCU_10.031607  | LC_Urine |
| 532 | LCU_532 | LCU_10.077939  | LC_Urine |
| 533 | LCU_533 | LCU_10.079326  | LC_Urine |
| 534 | LCU_534 | LCU_10.080652  | LC_Urine |
| 535 | LCU_535 | LCU_10.0996475 | LC_Urine |
| 536 | LCU_536 | LCU_10.102722  | LC_Urine |
| 537 | LCU_537 | LCU_10.105436  | LC_Urine |
| 538 | LCU_538 | LCU_10.212898  | LC_Urine |
| 539 | LCU_539 | LCU_10.309588  | LC_Urine |
| 540 | LCU_540 | LCU_10.353525  | LC_Urine |
| 541 | LCU_541 | LCU_10.355059  | LC_Urine |
| 542 | LCU_542 | LCU_10.432632  | LC_Urine |
| 543 | LCU_543 | LCU_10.43348   | LC_Urine |
| 544 | LCU_544 | LCU_10.503603  | LC_Urine |
| 545 | LCU_545 | LCU_10.653122  | LC_Urine |
| 546 | LCU_546 | LCU_10.775558  | LC_Urine |
| 547 | LCU_547 | LCU_10.8821535 | LC_Urine |
| 548 | LCU_548 | LCU_10.928152  | LC_Urine |
| 549 | LCU_549 | LCU_10.947792  | LC_Urine |
| 550 | LCU_550 | LCU_11.206437  | LC_Urine |
| 551 | LCU_551 | LCU_11.276952  | LC_Urine |
| 552 | LCU_552 | LCU_11.3586645 | LC_Urine |
| 553 | LCU_553 | LCU_11.456981  | LC_Urine |
| 554 | LCU_554 | LCU_11.459462  | LC_Urine |
| 555 | LCU_555 | LCU_11.544444  | LC_Urine |
| 556 | LCU_556 | LCU_11.546586  | LC_Urine |
| 557 | LCU_557 | LCU_11.546889  | LC_Urine |
| 558 | LCU_558 | LCU_11.54727   | LC_Urine |
| 559 | LCU_559 | LCU_11.613403  | LC_Urine |
| 560 | LCU_560 | LCU_11.637125  | LC_Urine |
| 561 | LCU_561 | LCU_11.6875    | LC_Urine |
| 562 | LCU_562 | LCU_11.775129  | LC_Urine |
| 563 | LCU_563 | LCU_11.979732  | LC_Urine |
| 564 | LCU_564 | LCU_12.112909  | LC_Urine |
| 565 | LCU_565 | LCU_12.175001  | LC_Urine |
| 566 | LCU_566 | LCU_12.199838  | LC_Urine |
| 567 | LCU_567 | LCU_12.262382  | LC_Urine |

|     |         |                |          |
|-----|---------|----------------|----------|
| 568 | LCU_568 | LCU_12.28367   | LC_Urine |
| 569 | LCU_569 | LCU_12.318223  | LC_Urine |
| 570 | LCU_570 | LCU_12.345813  | LC_Urine |
| 571 | LCU_571 | LCU_12.39081   | LC_Urine |
| 572 | LCU_572 | LCU_12.574298  | LC_Urine |
| 573 | LCU_573 | LCU_12.622506  | LC_Urine |
| 574 | LCU_574 | LCU_12.683618  | LC_Urine |
| 575 | LCU_575 | LCU_12.687773  | LC_Urine |
| 576 | LCU_576 | LCU_12.708569  | LC_Urine |
| 577 | LCU_577 | LCU_12.731935  | LC_Urine |
| 578 | LCU_578 | LCU_12.735333  | LC_Urine |
| 579 | LCU_579 | LCU_12.816047  | LC_Urine |
| 580 | LCU_580 | LCU_12.819522  | LC_Urine |
| 581 | LCU_581 | LCU_12.831981  | LC_Urine |
| 582 | LCU_582 | LCU_12.885777  | LC_Urine |
| 583 | LCU_583 | LCU_12.932332  | LC_Urine |
| 584 | LCU_584 | LCU_12.990493  | LC_Urine |
| 585 | LCU_585 | LCU_13.011092  | LC_Urine |
| 586 | LCU_586 | LCU_13.047636  | LC_Urine |
| 587 | LCU_587 | LCU_13.050343  | LC_Urine |
| 588 | LCU_588 | LCU_13.165144  | LC_Urine |
| 589 | LCU_589 | LCU_13.166287  | LC_Urine |
| 590 | LCU_590 | LCU_13.212046  | LC_Urine |
| 591 | LCU_591 | LCU_13.268795  | LC_Urine |
| 592 | LCU_592 | LCU_13.288082  | LC_Urine |
| 593 | LCU_593 | LCU_13.2883215 | LC_Urine |
| 594 | LCU_594 | LCU_13.364589  | LC_Urine |
| 595 | LCU_595 | LCU_13.465035  | LC_Urine |
| 596 | LCU_596 | LCU_13.520692  | LC_Urine |
| 597 | LCU_597 | LCU_13.632856  | LC_Urine |
| 598 | LCU_598 | LCU_13.647049  | LC_Urine |
| 599 | LCU_599 | LCU_13.874223  | LC_Urine |
| 600 | LCU_600 | LCU_13.942835  | LC_Urine |
| 601 | LCU_601 | LCU_14.094934  | LC_Urine |
| 602 | LCU_602 | LCU_14.145176  | LC_Urine |
| 603 | LCU_603 | LCU_14.145303  | LC_Urine |
| 604 | LCU_604 | LCU_14.251763  | LC_Urine |
| 605 | LCU_605 | LCU_14.266001  | LC_Urine |
| 606 | LCU_606 | LCU_14.281033  | LC_Urine |
| 607 | LCU_607 | LCU_14.298923  | LC_Urine |
| 608 | LCU_608 | LCU_14.304633  | LC_Urine |
| 609 | LCU_609 | LCU_14.35792   | LC_Urine |
| 610 | LCU_610 | LCU_14.358581  | LC_Urine |
| 611 | LCU_611 | LCU_14.359205  | LC_Urine |
| 612 | LCU_612 | LCU_14.361777  | LC_Urine |
| 613 | LCU_613 | LCU_14.361777  | LC_Urine |
| 614 | LCU_614 | LCU_14.365107  | LC_Urine |
| 615 | LCU_615 | LCU_14.365107  | LC_Urine |
| 616 | LCU_616 | LCU_14.453684  | LC_Urine |
| 617 | LCU_617 | LCU_14.461346  | LC_Urine |
| 618 | LCU_618 | LCU_14.5082655 | LC_Urine |
| 619 | LCU_619 | LCU_14.513499  | LC_Urine |
| 620 | LCU_620 | LCU_14.563794  | LC_Urine |
| 621 | LCU_621 | LCU_14.722332  | LC_Urine |
| 622 | LCU_622 | LCU_14.737936  | LC_Urine |
| 623 | LCU_623 | LCU_14.74322   | LC_Urine |
| 624 | LCU_624 | LCU_14.795255  | LC_Urine |
| 625 | LCU_625 | LCU_14.850871  | LC_Urine |
| 626 | LCU_626 | LCU_14.855693  | LC_Urine |
| 627 | LCU_627 | LCU_14.894733  | LC_Urine |
| 628 | LCU_628 | LCU_14.981606  | LC_Urine |
| 629 | LCU_629 | LCU_14.983619  | LC_Urine |

|     |         |                |          |
|-----|---------|----------------|----------|
| 630 | LCU_630 | LCU_14.98419   | LC_Urine |
| 631 | LCU_631 | LCU_14.98419   | LC_Urine |
| 632 | LCU_632 | LCU_14.98438   | LC_Urine |
| 633 | LCU_633 | LCU_15.080557  | LC_Urine |
| 634 | LCU_634 | LCU_15.086254  | LC_Urine |
| 635 | LCU_635 | LCU_15.14852   | LC_Urine |
| 636 | LCU_636 | LCU_15.151192  | LC_Urine |
| 637 | LCU_637 | LCU_15.205523  | LC_Urine |
| 638 | LCU_638 | LCU_15.225825  | LC_Urine |
| 639 | LCU_639 | LCU_15.315269  | LC_Urine |
| 640 | LCU_640 | LCU_15.422077  | LC_Urine |
| 641 | LCU_641 | LCU_15.437079  | LC_Urine |
| 642 | LCU_642 | LCU_15.469015  | LC_Urine |
| 643 | LCU_643 | LCU_15.495161  | LC_Urine |
| 644 | LCU_644 | LCU_15.588093  | LC_Urine |
| 645 | LCU_645 | LCU_15.67758   | LC_Urine |
| 646 | LCU_646 | LCU_15.6806    | LC_Urine |
| 647 | LCU_647 | LCU_15.680611  | LC_Urine |
| 648 | LCU_648 | LCU_15.681091  | LC_Urine |
| 649 | LCU_649 | LCU_15.681164  | LC_Urine |
| 650 | LCU_650 | LCU_15.68129   | LC_Urine |
| 651 | LCU_651 | LCU_15.681965  | LC_Urine |
| 652 | LCU_652 | LCU_15.68209   | LC_Urine |
| 653 | LCU_653 | LCU_15.683433  | LC_Urine |
| 654 | LCU_654 | LCU_15.68474   | LC_Urine |
| 655 | LCU_655 | LCU_15.710089  | LC_Urine |
| 656 | LCU_656 | LCU_15.713095  | LC_Urine |
| 657 | LCU_657 | LCU_15.74408   | LC_Urine |
| 658 | LCU_658 | LCU_15.759273  | LC_Urine |
| 659 | LCU_659 | LCU_15.762667  | LC_Urine |
| 660 | LCU_660 | LCU_15.768744  | LC_Urine |
| 661 | LCU_661 | LCU_15.778476  | LC_Urine |
| 662 | LCU_662 | LCU_15.7982855 | LC_Urine |
| 663 | LCU_663 | LCU_15.813449  | LC_Urine |
| 664 | LCU_664 | LCU_15.896331  | LC_Urine |
| 665 | LCU_665 | LCU_15.900883  | LC_Urine |
| 666 | LCU_666 | LCU_15.906646  | LC_Urine |
| 667 | LCU_667 | LCU_15.912666  | LC_Urine |
| 668 | LCU_668 | LCU_15.916633  | LC_Urine |
| 669 | LCU_669 | LCU_15.946351  | LC_Urine |
| 670 | LCU_670 | LCU_15.960944  | LC_Urine |
| 671 | LCU_671 | LCU_16.002102  | LC_Urine |
| 672 | LCU_672 | LCU_16.004103  | LC_Urine |
| 673 | LCU_673 | LCU_16.005022  | LC_Urine |
| 674 | LCU_674 | LCU_16.010103  | LC_Urine |
| 675 | LCU_675 | LCU_16.01177   | LC_Urine |
| 676 | LCU_676 | LCU_16.013063  | LC_Urine |
| 677 | LCU_677 | LCU_16.01392   | LC_Urine |
| 678 | LCU_678 | LCU_16.053082  | LC_Urine |
| 679 | LCU_679 | LCU_16.085033  | LC_Urine |
| 680 | LCU_680 | LCU_16.104239  | LC_Urine |
| 681 | LCU_681 | LCU_16.113829  | LC_Urine |
| 682 | LCU_682 | LCU_16.139267  | LC_Urine |
| 683 | LCU_683 | LCU_16.148588  | LC_Urine |
| 684 | LCU_684 | LCU_16.155415  | LC_Urine |
| 685 | LCU_685 | LCU_16.15587   | LC_Urine |
| 686 | LCU_686 | LCU_16.156857  | LC_Urine |
| 687 | LCU_687 | LCU_16.160295  | LC_Urine |
| 688 | LCU_688 | LCU_16.164032  | LC_Urine |
| 689 | LCU_689 | LCU_16.167204  | LC_Urine |
| 690 | LCU_690 | LCU_16.19138   | LC_Urine |
| 691 | LCU_691 | LCU_16.205095  | LC_Urine |

|     |         |               |          |
|-----|---------|---------------|----------|
| 692 | LCU_692 | LCU_16.231874 | LC_Urine |
| 693 | LCU_693 | LCU_16.254398 | LC_Urine |
| 694 | LCU_694 | LCU_16.297667 | LC_Urine |
| 695 | LCU_695 | LCU_16.301191 | LC_Urine |
| 696 | LCU_696 | LCU_16.304703 | LC_Urine |
| 697 | LCU_697 | LCU_16.30576  | LC_Urine |
| 698 | LCU_698 | LCU_16.315142 | LC_Urine |
| 699 | LCU_699 | LCU_16.327337 | LC_Urine |
| 700 | LCU_700 | LCU_16.358772 | LC_Urine |
| 701 | LCU_701 | LCU_16.374523 | LC_Urine |
| 702 | LCU_702 | LCU_16.384253 | LC_Urine |
| 703 | LCU_703 | LCU_16.412611 | LC_Urine |
| 704 | LCU_704 | LCU_16.424555 | LC_Urine |
| 705 | LCU_705 | LCU_16.443018 | LC_Urine |
| 706 | LCU_706 | LCU_16.44573  | LC_Urine |
| 707 | LCU_707 | LCU_16.447248 | LC_Urine |
| 708 | LCU_708 | LCU_16.45167  | LC_Urine |
| 709 | LCU_709 | LCU_16.452784 | LC_Urine |
| 710 | LCU_710 | LCU_16.453796 | LC_Urine |
| 711 | LCU_711 | LCU_16.453957 | LC_Urine |
| 712 | LCU_712 | LCU_16.49991  | LC_Urine |
| 713 | LCU_713 | LCU_16.530794 | LC_Urine |
| 714 | LCU_714 | LCU_16.531557 | LC_Urine |
| 715 | LCU_715 | LCU_16.531761 | LC_Urine |
| 716 | LCU_716 | LCU_16.563206 | LC_Urine |
| 717 | LCU_717 | LCU_16.592648 | LC_Urine |
| 718 | LCU_718 | LCU_16.594654 | LC_Urine |
| 719 | LCU_719 | LCU_16.630138 | LC_Urine |
| 720 | LCU_720 | LCU_16.651237 | LC_Urine |
| 721 | LCU_721 | LCU_16.657778 | LC_Urine |
| 722 | LCU_722 | LCU_16.690538 | LC_Urine |
| 723 | LCU_723 | LCU_16.72175  | LC_Urine |
| 724 | LCU_724 | LCU_16.733065 | LC_Urine |
| 725 | LCU_725 | LCU_16.740698 | LC_Urine |
| 726 | LCU_726 | LCU_16.750484 | LC_Urine |
| 727 | LCU_727 | LCU_16.76293  | LC_Urine |
| 728 | LCU_728 | LCU_16.76293  | LC_Urine |
| 729 | LCU_729 | LCU_16.76756  | LC_Urine |
| 730 | LCU_730 | LCU_16.797155 | LC_Urine |
| 731 | LCU_731 | LCU_16.797253 | LC_Urine |
| 732 | LCU_732 | LCU_16.803474 | LC_Urine |
| 733 | LCU_733 | LCU_16.840853 | LC_Urine |
| 734 | LCU_734 | LCU_16.85239  | LC_Urine |
| 735 | LCU_735 | LCU_16.86802  | LC_Urine |
| 736 | LCU_736 | LCU_16.889019 | LC_Urine |
| 737 | LCU_737 | LCU_16.901873 | LC_Urine |
| 738 | LCU_738 | LCU_16.904327 | LC_Urine |
| 739 | LCU_739 | LCU_16.906145 | LC_Urine |
| 740 | LCU_740 | LCU_16.913258 | LC_Urine |
| 741 | LCU_741 | LCU_16.926037 | LC_Urine |
| 742 | LCU_742 | LCU_16.927883 | LC_Urine |
| 743 | LCU_743 | LCU_16.942999 | LC_Urine |
| 744 | LCU_744 | LCU_16.947811 | LC_Urine |
| 745 | LCU_745 | LCU_16.9505   | LC_Urine |
| 746 | LCU_746 | LCU_16.95604  | LC_Urine |
| 747 | LCU_747 | LCU_16.957428 | LC_Urine |
| 748 | LCU_748 | LCU_16.95881  | LC_Urine |
| 749 | LCU_749 | LCU_16.959627 | LC_Urine |
| 750 | LCU_750 | LCU_16.965256 | LC_Urine |
| 751 | LCU_751 | LCU_16.96902  | LC_Urine |
| 752 | LCU_752 | LCU_16.986    | LC_Urine |
| 753 | LCU_753 | LCU_16.987621 | LC_Urine |

|     |         |                                                                   |          |
|-----|---------|-------------------------------------------------------------------|----------|
| 754 | LCU_754 | LCU_16.991556                                                     | LC_Urine |
| 755 | LCU_755 | LCU_16.999695                                                     | LC_Urine |
| 756 | LCU_756 | LCU_17.001925                                                     | LC_Urine |
| 757 | LCU_757 | LCU_17.010366                                                     | LC_Urine |
| 758 | LCU_758 | LCU_17.023525                                                     | LC_Urine |
| 759 | LCU_759 | LCU_17.02505                                                      | LC_Urine |
| 760 | LCU_760 | LCU_17.028112                                                     | LC_Urine |
| 761 | LCU_761 | LCU_17.051466                                                     | LC_Urine |
| 762 | LCU_762 | LCU_17.054537                                                     | LC_Urine |
| 763 | LCU_763 | LCU_17.059132                                                     | LC_Urine |
| 764 | LCU_764 | LCU_17.074694                                                     | LC_Urine |
| 765 | LCU_765 | LCU_17.092299                                                     | LC_Urine |
| 766 | LCU_766 | LCU_17.101738                                                     | LC_Urine |
| 767 | LCU_767 | LCU_17.11657                                                      | LC_Urine |
| 768 | LCU_768 | LCU_17.125387                                                     | LC_Urine |
| 769 | LCU_769 | LCU_17.125635                                                     | LC_Urine |
| 770 | LCU_770 | LCU_17.160244                                                     | LC_Urine |
| 771 | LCU_771 | LCU_17.160688                                                     | LC_Urine |
| 772 | LCU_772 | LCU_17.162664                                                     | LC_Urine |
| 773 | LCU_773 | LCU_17.164072                                                     | LC_Urine |
| 774 | LCU_774 | LCU_17.166054                                                     | LC_Urine |
| 775 | LCU_775 | LCU_17.166166                                                     | LC_Urine |
| 776 | LCU_776 | LCU_17.166704                                                     | LC_Urine |
| 777 | LCU_777 | LCU_17.166906                                                     | LC_Urine |
| 778 | LCU_778 | LCU_17.166945                                                     | LC_Urine |
| 779 | LCU_779 | LCU_17.16811                                                      | LC_Urine |
| 780 | LCU_780 | LCU_17.169128                                                     | LC_Urine |
| 781 | LCU_781 | LCU_17.170296                                                     | LC_Urine |
| 782 | LCU_782 | LCU_17.175451                                                     | LC_Urine |
| 783 | LCU_783 | LCU_17.178919                                                     | LC_Urine |
| 784 | LCU_784 | LCU_17.182117                                                     | LC_Urine |
| 785 | LCU_785 | LCU_17.186037                                                     | LC_Urine |
| 786 | LCU_786 | LCU_17.186518                                                     | LC_Urine |
| 787 | LCU_787 | LCU_17.186779                                                     | LC_Urine |
| 788 | LCU_788 | LCU_17.198364                                                     | LC_Urine |
| 789 | LCU_789 | LCU_17.203732                                                     | LC_Urine |
| 790 | LCU_790 | LCU_17.224146                                                     | LC_Urine |
| 791 | LCU_791 | LCU_17.287683                                                     | LC_Urine |
| 792 | LCU_792 | LCU_17.288176                                                     | LC_Urine |
| 793 | LCU_793 | LCU_17.29038                                                      | LC_Urine |
| 794 | LCU_794 | LCU_17.29657                                                      | LC_Urine |
| 795 | LCU_795 | LCU_17.320658                                                     | LC_Urine |
| 796 | LCS_796 | LCS_glychocholic acid                                             | LC_Serum |
| 797 | LCS_797 | LCS_1-heptadecanoyl-sn-glycero-3-phosphocholine                   | LC_Serum |
| 798 | LCS_798 | LCS_1-O-Hexadecyl-2-O-arachidonoyl-sn-glycero-3-phosphorylcholine | LC_Serum |
| 799 | LCS_799 | LCS_2-Methylbutyroylcarnitine                                     | LC_Serum |
| 800 | LCS_800 | LCS_3-O-Hexadecyl-2-O-acetyl-sn-glycero-1-phosphorylcholine       | LC_Serum |
| 801 | LCS_801 | LCS_Acetylcarnitine                                               | LC_Serum |
| 802 | LCS_802 | LCS_AcetylCarnitineC3:0                                           | LC_Serum |
| 803 | LCS_803 | LCS_Acylcarnitine C14:0                                           | LC_Serum |
| 804 | LCS_804 | LCS_Acylcarnitine C14:1                                           | LC_Serum |
| 805 | LCS_805 | LCS_Acylcarnitine C5:0                                            | LC_Serum |
| 806 | LCS_806 | LCS_Acylcarnitine C6:0                                            | LC_Serum |
| 807 | LCS_807 | LCS_Betaine                                                       | LC_Serum |
| 808 | LCS_808 | LCS_Butyryl-L-carnitine                                           | LC_Serum |
| 809 | LCS_809 | LCS_Carnitine                                                     | LC_Serum |
| 810 | LCS_810 | LCS_Choline                                                       | LC_Serum |
| 811 | LCS_811 | LCS_Creatinine                                                    | LC_Serum |
| 812 | LCS_812 | LCS_Decanoyl-L-carnitine                                          | LC_Serum |
| 813 | LCS_813 | LCS_Dioctyl phthalate Contaminent                                 | LC_Serum |
| 814 | LCS_814 | LCS_DL-Stearoylcarnitine                                          | LC_Serum |
| 815 | LCS_815 | LCS_Elaidicarnitine                                               | LC_Serum |

|     |         |                            |          |
|-----|---------|----------------------------|----------|
| 816 | LCS_816 | LCS_Inosine                | LC_Serum |
| 817 | LCS_817 | LCS_L-Octanoylcarnitine    | LC_Serum |
| 818 | LCS_818 | LCS_PC 38:5                | LC_Serum |
| 819 | LCS_819 | LCS_PC16:0                 | LC_Serum |
| 820 | LCS_820 | LCS_PC18:2                 | LC_Serum |
| 821 | LCS_821 | LCS_PC32:1                 | LC_Serum |
| 822 | LCS_822 | LCS_PC34:2                 | LC_Serum |
| 823 | LCS_823 | LCS_PC36:4                 | LC_Serum |
| 824 | LCS_824 | LCS_PC36:5                 | LC_Serum |
| 825 | LCS_825 | LCS_PC38:4                 | LC_Serum |
| 826 | LCS_826 | LCS_PC38:5                 | LC_Serum |
| 827 | LCS_827 | LCS_PC38:6                 | LC_Serum |
| 828 | LCS_828 | LCS_PC40:5                 | LC_Serum |
| 829 | LCS_829 | LCS_PC40:6                 | LC_Serum |
| 830 | LCS_830 | LCS_PELLETERINE            | LC_Serum |
| 831 | LCS_831 | LCS_Phe Phe                | LC_Serum |
| 832 | LCS_832 | LCS_Phenylalanine          | LC_Serum |
| 833 | LCS_833 | LCS_Piperine               | LC_Serum |
| 834 | LCS_834 | LCS_Proline                | LC_Serum |
| 835 | LCS_835 | LCS_Propionyl-L-carnitine  | LC_Serum |
| 836 | LCS_836 | LCS_Theophylline           | LC_Serum |
| 837 | LCS_837 | LCS_Valine                 | LC_Serum |
| 838 | GCS_838 | GCS_xanthine               | GC_Serum |
| 839 | GCS_839 | GCS_valine                 | GC_Serum |
| 840 | GCS_840 | GCS_uridine                | GC_Serum |
| 841 | GCS_841 | GCS_uric acid              | GC_Serum |
| 842 | GCS_842 | GCS_urea                   | GC_Serum |
| 843 | GCS_843 | GCS_tyrosine               | GC_Serum |
| 844 | GCS_844 | GCS_tryptophan             | GC_Serum |
| 845 | GCS_845 | GCS_trans-4-hydroxyproline | GC_Serum |
| 846 | GCS_846 | GCS_tocopherol alpha       | GC_Serum |
| 847 | GCS_847 | GCS_thymine                | GC_Serum |
| 848 | GCS_848 | GCS_threose                | GC_Serum |
| 849 | GCS_849 | GCS_threonine              | GC_Serum |
| 850 | GCS_850 | GCS_threonic acid          | GC_Serum |
| 851 | GCS_851 | GCS_taurine                | GC_Serum |
| 852 | GCS_852 | GCS_succinic acid          | GC_Serum |
| 853 | GCS_853 | GCS_stearic acid           | GC_Serum |
| 854 | GCS_854 | GCS_sorbitol               | GC_Serum |
| 855 | GCS_855 | GCS_shikimic acid          | GC_Serum |
| 856 | GCS_856 | GCS_serine                 | GC_Serum |
| 857 | GCS_857 | GCS_salicylic acid         | GC_Serum |
| 858 | GCS_858 | GCS_salicylaldehyde        | GC_Serum |
| 859 | GCS_859 | GCS_ribonic acid           | GC_Serum |
| 860 | GCS_860 | GCS_ribitol                | GC_Serum |
| 861 | GCS_861 | GCS_pyruvic acid           | GC_Serum |
| 862 | GCS_862 | GCS_propane-1,3-diol NIST  | GC_Serum |
| 863 | GCS_863 | GCS_proline                | GC_Serum |
| 864 | GCS_864 | GCS_pipelicolic acid       | GC_Serum |
| 865 | GCS_865 | GCS_phthalic acid          | GC_Serum |
| 866 | GCS_866 | GCS_phosphoric acid        | GC_Serum |
| 867 | GCS_867 | GCS_phosphoethanolamine    | GC_Serum |
| 868 | GCS_868 | GCS_phenylethylamine       | GC_Serum |
| 869 | GCS_869 | GCS_phenylalanine          | GC_Serum |
| 870 | GCS_870 | GCS_phenylacetic acid      | GC_Serum |
| 871 | GCS_871 | GCS_pentadecanoic acid     | GC_Serum |
| 872 | GCS_872 | GCS_pelargonic acid        | GC_Serum |
| 873 | GCS_873 | GCS_paracetamol            | GC_Serum |
| 874 | GCS_874 | GCS_parabanic acid NIST    | GC_Serum |
| 875 | GCS_875 | GCS_pantothenic acid       | GC_Serum |
| 876 | GCS_876 | GCS_palmitoleic acid       | GC_Serum |
| 877 | GCS_877 | GCS_palmitic acid          | GC_Serum |

|     |         |                              |          |
|-----|---------|------------------------------|----------|
| 878 | GCS_878 | GCS_oxoproline               | GC_Serum |
| 879 | GCS_879 | GCS_oxalic acid              | GC_Serum |
| 880 | GCS_880 | GCS_ornithine                | GC_Serum |
| 881 | GCS_881 | GCS_oleic acid               | GC_Serum |
| 882 | GCS_882 | GCS_octadecanol              | GC_Serum |
| 883 | GCS_883 | GCS_naproxen                 | GC_Serum |
| 884 | GCS_884 | GCS_N-acetylglycine NIST     | GC_Serum |
| 885 | GCS_885 | GCS_N-acetylglutamate        | GC_Serum |
| 886 | GCS_886 | GCS_N-acetyl-D-hexosamine    | GC_Serum |
| 887 | GCS_887 | GCS_myristic acid            | GC_Serum |
| 888 | GCS_888 | GCS_methylhexadecanoic acid  | GC_Serum |
| 889 | GCS_889 | GCS_methionine sulfoxide     | GC_Serum |
| 890 | GCS_890 | GCS_methionine               | GC_Serum |
| 891 | GCS_891 | GCS_methanolphosphate        | GC_Serum |
| 892 | GCS_892 | GCS_malic acid               | GC_Serum |
| 893 | GCS_893 | GCS_maleimide                | GC_Serum |
| 894 | GCS_894 | GCS_lysin                    | GC_Serum |
| 895 | GCS_895 | GCS_linolenic acid           | GC_Serum |
| 896 | GCS_896 | GCS_linoleic acid            | GC_Serum |
| 897 | GCS_897 | GCS_leucine                  | GC_Serum |
| 898 | GCS_898 | GCS_lauric acid              | GC_Serum |
| 899 | GCS_899 | GCS_lactic acid              | GC_Serum |
| 900 | GCS_900 | GCS_kynurenine               | GC_Serum |
| 901 | GCS_901 | GCS_isorhamnose              | GC_Serum |
| 902 | GCS_902 | GCS_isolinoleic acid NIST    | GC_Serum |
| 903 | GCS_903 | GCS_isoleucine               | GC_Serum |
| 904 | GCS_904 | GCS_isocitric acid           | GC_Serum |
| 905 | GCS_905 | GCS_inosine                  | GC_Serum |
| 906 | GCS_906 | GCS_indole-3-lactate         | GC_Serum |
| 907 | GCS_907 | GCS_indole-3-acetate         | GC_Serum |
| 908 | GCS_908 | GCS_idonic acid NIST         | GC_Serum |
| 909 | GCS_909 | GCS_icosenoic acid           | GC_Serum |
| 910 | GCS_910 | GCS_hydroxylamine            | GC_Serum |
| 911 | GCS_911 | GCS_hydrocinnamic acid       | GC_Serum |
| 912 | GCS_912 | GCS_histidine                | GC_Serum |
| 913 | GCS_913 | GCS_hippuric acid            | GC_Serum |
| 914 | GCS_914 | GCS_heptadecanoic acid NIST  | GC_Serum |
| 915 | GCS_915 | GCS_guanosine                | GC_Serum |
| 916 | GCS_916 | GCS_glycolic acid            | GC_Serum |
| 917 | GCS_917 | GCS_glycine                  | GC_Serum |
| 918 | GCS_918 | GCS_glycerol-alpha-phosphate | GC_Serum |
| 919 | GCS_919 | GCS_glyceric acid            | GC_Serum |
| 920 | GCS_920 | GCS_glutaric acid            | GC_Serum |
| 921 | GCS_921 | GCS_glutamine                | GC_Serum |
| 922 | GCS_922 | GCS_glutamic acid            | GC_Serum |
| 923 | GCS_923 | GCS_glucose                  | GC_Serum |
| 924 | GCS_924 | GCS_gluconic acid lactone    | GC_Serum |
| 925 | GCS_925 | GCS_gluconic acid            | GC_Serum |
| 926 | GCS_926 | GCS_gamma-tocopherol         | GC_Serum |
| 927 | GCS_927 | GCS_hexuronic acid           | GC_Serum |
| 928 | GCS_928 | GCS_galacturonic acid        | GC_Serum |
| 929 | GCS_929 | GCS_galactose                | GC_Serum |
| 930 | GCS_930 | GCS_GABA                     | GC_Serum |
| 931 | GCS_931 | GCS_fumaric acid             | GC_Serum |
| 932 | GCS_932 | GCS_fructose                 | GC_Serum |
| 933 | GCS_933 | GCS_ethanolamine             | GC_Serum |
| 934 | GCS_934 | GCS_erythritol               | GC_Serum |
| 935 | GCS_935 | GCS_dopamine NIST            | GC_Serum |
| 936 | GCS_936 | GCS_dodecanol                | GC_Serum |
| 937 | GCS_937 | GCS_dodecane                 | GC_Serum |
| 938 | GCS_938 | GCS_dihydroabietic acid      | GC_Serum |
| 939 | GCS_939 | GCS_dihydro-3-coumaric acid  | GC_Serum |

|      |          |                                        |          |
|------|----------|----------------------------------------|----------|
| 940  | GCS_940  | GCS_cytidine-5'-diphosphate            | GC_Serum |
| 941  | GCS_941  | GCS_cystine                            | GC_Serum |
| 942  | GCS_942  | GCS_cysteine-glycine                   | GC_Serum |
| 943  | GCS_943  | GCS_creatinine                         | GC_Serum |
| 944  | GCS_944  | GCS_citrulline                         | GC_Serum |
| 945  | GCS_945  | GCS_citric acid                        | GC_Serum |
| 946  | GCS_946  | GCS_citramalic acid                    | GC_Serum |
| 947  | GCS_947  | GCS_cholesterol                        | GC_Serum |
| 948  | GCS_948  | GCS_cellobiose                         | GC_Serum |
| 949  | GCS_949  | GCS_caprylic acid                      | GC_Serum |
| 950  | GCS_950  | GCS_capric acid                        | GC_Serum |
| 951  | GCS_951  | GCS_butyrolactam NIST                  | GC_Serum |
| 952  | GCS_952  | GCS_biuret                             | GC_Serum |
| 953  | GCS_953  | GCS_beta-sitosterol                    | GC_Serum |
| 954  | GCS_954  | GCS_beta-alanine                       | GC_Serum |
| 955  | GCS_955  | GCS_benzylalcohol                      | GC_Serum |
| 956  | GCS_956  | GCS_benzoic acid                       | GC_Serum |
| 957  | GCS_957  | GCS_behenic acid                       | GC_Serum |
| 958  | GCS_958  | GCS_azelaic acid                       | GC_Serum |
| 959  | GCS_959  | GCS_aspartic acid                      | GC_Serum |
| 960  | GCS_960  | GCS_asparagine                         | GC_Serum |
| 961  | GCS_961  | GCS_arachidonic acid isomer            | GC_Serum |
| 962  | GCS_962  | GCS_arachidonic acid                   | GC_Serum |
| 963  | GCS_963  | GCS_arabinose                          | GC_Serum |
| 964  | GCS_964  | GCS_aminomalonic acid                  | GC_Serum |
| 965  | GCS_965  | GCS_allantoic acid                     | GC_Serum |
| 966  | GCS_966  | GCS_alanine                            | GC_Serum |
| 967  | GCS_967  | GCS_adipic acid                        | GC_Serum |
| 968  | GCS_968  | GCS_aconitic acid                      | GC_Serum |
| 969  | GCS_969  | GCS_5-methoxytryptamine                | GC_Serum |
| 970  | GCS_970  | GCS_5-hydroxyindole-3-acetic acid NIST | GC_Serum |
| 971  | GCS_971  | GCS_5-deoxyribose NIST                 | GC_Serum |
| 972  | GCS_972  | GCS_4-hydroxyphenylacetic acid         | GC_Serum |
| 973  | GCS_973  | GCS_3-phenyllactic acid                | GC_Serum |
| 974  | GCS_974  | GCS_3-hydroxypropionic acid            | GC_Serum |
| 975  | GCS_975  | GCS_3-hydroxybutanoic acid             | GC_Serum |
| 976  | GCS_976  | GCS_3-aminoisobutyric acid             | GC_Serum |
| 977  | GCS_977  | GCS_2-hydroxyvaleric acid              | GC_Serum |
| 978  | GCS_978  | GCS_2-hydroxyglutaric acid             | GC_Serum |
| 979  | GCS_979  | GCS_2-hydroxybutanoic acid             | GC_Serum |
| 980  | GCS_980  | GCS_2-hydroxy-2-methylbutanoic acid    | GC_Serum |
| 981  | GCS_981  | GCS_2-deoxyribonic acid                | GC_Serum |
| 982  | GCS_982  | GCS_2-deoxyerythritol NIST             | GC_Serum |
| 983  | GCS_983  | GCS_2-aminoadipic acid                 | GC_Serum |
| 984  | GCS_984  | GCS_1-monostearin                      | GC_Serum |
| 985  | GCS_985  | GCS_1-monopalmitin                     | GC_Serum |
| 986  | GCS_986  | GCS_1-monoolein                        | GC_Serum |
| 987  | GCS_987  | GCS_1-hexadecanol                      | GC_Serum |
| 988  | GCS_988  | GCS_1-deoxyerythritol                  | GC_Serum |
| 989  | GCS_989  | GCS_1,5-anhydroglucitol                | GC_Serum |
| 990  | GCS_990  | GCS_206289                             | GC_Serum |
| 991  | GCS_991  | GCS_492765                             | GC_Serum |
| 992  | GCS_992  | GCS_473067                             | GC_Serum |
| 993  | GCS_993  | GCS_213253                             | GC_Serum |
| 994  | GCS_994  | GCS_204344                             | GC_Serum |
| 995  | GCS_995  | GCS_486090                             | GC_Serum |
| 996  | GCS_996  | GCS_438058                             | GC_Serum |
| 997  | GCS_997  | GCS_199786                             | GC_Serum |
| 998  | GCS_998  | GCS_215397                             | GC_Serum |
| 999  | GCS_999  | GCS_446633                             | GC_Serum |
| 1000 | GCS_1000 | GCS_199777                             | GC_Serum |
| 1001 | GCS_1001 | GCS_216427                             | GC_Serum |



|      |          |            |          |
|------|----------|------------|----------|
| 1002 | GCS_1002 | GCS_367936 | GC_Serum |
| 1003 | GCS_1003 | GCS_486054 | GC_Serum |
| 1004 | GCS_1004 | GCS_299153 | GC_Serum |
| 1005 | GCS_1005 | GCS_438059 | GC_Serum |
| 1006 | GCS_1006 | GCS_485397 | GC_Serum |
| 1007 | GCS_1007 | GCS_306148 | GC_Serum |
| 1008 | GCS_1008 | GCS_368008 | GC_Serum |
| 1009 | GCS_1009 | GCS_213972 | GC_Serum |
| 1010 | GCS_1010 | GCS_425836 | GC_Serum |
| 1011 | GCS_1011 | GCS_408731 | GC_Serum |
| 1012 | GCS_1012 | GCS_273773 | GC_Serum |
| 1013 | GCS_1013 | GCS_486007 | GC_Serum |
| 1014 | GCS_1014 | GCS_212649 | GC_Serum |
| 1015 | GCS_1015 | GCS_308137 | GC_Serum |
| 1016 | GCS_1016 | GCS_446628 | GC_Serum |
| 1017 | GCS_1017 | GCS_438061 | GC_Serum |
| 1018 | GCS_1018 | GCS_446067 | GC_Serum |
| 1019 | GCS_1019 | GCS_486211 | GC_Serum |
| 1020 | GCS_1020 | GCS_301536 | GC_Serum |
| 1021 | GCS_1021 | GCS_223566 | GC_Serum |
| 1022 | GCS_1022 | GCS_486213 | GC_Serum |
| 1023 | GCS_1023 | GCS_306159 | GC_Serum |
| 1024 | GCS_1024 | GCS_210286 | GC_Serum |
| 1025 | GCS_1025 | GCS_474632 | GC_Serum |
| 1026 | GCS_1026 | GCS_300866 | GC_Serum |
| 1027 | GCS_1027 | GCS_309532 | GC_Serum |
| 1028 | GCS_1028 | GCS_337157 | GC_Serum |
| 1029 | GCS_1029 | GCS_474971 | GC_Serum |
| 1030 | GCS_1030 | GCS_273182 | GC_Serum |
| 1031 | GCS_1031 | GCS_228673 | GC_Serum |
| 1032 | GCS_1032 | GCS_486218 | GC_Serum |
| 1033 | GCS_1033 | GCS_408618 | GC_Serum |
| 1034 | GCS_1034 | GCS_484792 | GC_Serum |
| 1035 | GCS_1035 | GCS_199596 | GC_Serum |
| 1036 | GCS_1036 | GCS_273925 | GC_Serum |
| 1037 | GCS_1037 | GCS_486020 | GC_Serum |
| 1038 | GCS_1038 | GCS_200644 | GC_Serum |
| 1039 | GCS_1039 | GCS_455312 | GC_Serum |
| 1040 | GCS_1040 | GCS_486017 | GC_Serum |
| 1041 | GCS_1041 | GCS_307966 | GC_Serum |
| 1042 | GCS_1042 | GCS_356925 | GC_Serum |
| 1043 | GCS_1043 | GCS_206526 | GC_Serum |
| 1044 | GCS_1044 | GCS_242565 | GC_Serum |
| 1045 | GCS_1045 | GCS_486016 | GC_Serum |
| 1046 | GCS_1046 | GCS_226912 | GC_Serum |
| 1047 | GCS_1047 | GCS_214011 | GC_Serum |
| 1048 | GCS_1048 | GCS_485388 | GC_Serum |
| 1049 | GCS_1049 | GCS_473083 | GC_Serum |
| 1050 | GCS_1050 | GCS_308234 | GC_Serum |
| 1051 | GCS_1051 | GCS_225043 | GC_Serum |
| 1052 | GCS_1052 | GCS_404754 | GC_Serum |
| 1053 | GCS_1053 | GCS_477827 | GC_Serum |
| 1054 | GCS_1054 | GCS_227902 | GC_Serum |
| 1055 | GCS_1055 | GCS_221574 | GC_Serum |
| 1056 | GCS_1056 | GCS_309730 | GC_Serum |
| 1057 | GCS_1057 | GCS_479886 | GC_Serum |
| 1058 | GCS_1058 | GCS_222115 | GC_Serum |
| 1059 | GCS_1059 | GCS_228872 | GC_Serum |
| 1060 | GCS_1060 | GCS_200506 | GC_Serum |
| 1061 | GCS_1061 | GCS_212866 | GC_Serum |
| 1062 | GCS_1062 | GCS_438093 | GC_Serum |
| 1063 | GCS_1063 | GCS_208557 | GC_Serum |

|      |          |            |          |
|------|----------|------------|----------|
| 1064 | GCS_1064 | GCS_465393 | GC_Serum |
| 1065 | GCS_1065 | GCS_338896 | GC_Serum |
| 1066 | GCS_1066 | GCS_214160 | GC_Serum |
| 1067 | GCS_1067 | GCS_362005 | GC_Serum |
| 1068 | GCS_1068 | GCS_217797 | GC_Serum |
| 1069 | GCS_1069 | GCS_214685 | GC_Serum |
| 1070 | GCS_1070 | GCS_213185 | GC_Serum |
| 1071 | GCS_1071 | GCS_207223 | GC_Serum |
| 1072 | GCS_1072 | GCS_224632 | GC_Serum |
| 1073 | GCS_1073 | GCS_226850 | GC_Serum |
| 1074 | GCS_1074 | GCS_289052 | GC_Serum |
| 1075 | GCS_1075 | GCS_408490 | GC_Serum |
| 1076 | GCS_1076 | GCS_200850 | GC_Serum |
| 1077 | GCS_1077 | GCS_213160 | GC_Serum |
| 1078 | GCS_1078 | GCS_485553 | GC_Serum |
| 1079 | GCS_1079 | GCS_407508 | GC_Serum |
| 1080 | GCS_1080 | GCS_486245 | GC_Serum |
| 1081 | GCS_1081 | GCS_272694 | GC_Serum |
| 1082 | GCS_1082 | GCS_414988 | GC_Serum |
| 1083 | GCS_1083 | GCS_223191 | GC_Serum |
| 1084 | GCS_1084 | GCS_455340 | GC_Serum |
| 1085 | GCS_1085 | GCS_222169 | GC_Serum |
| 1086 | GCS_1086 | GCS_415114 | GC_Serum |
| 1087 | GCS_1087 | GCS_495239 | GC_Serum |
| 1088 | GCS_1088 | GCS_218765 | GC_Serum |
| 1089 | GCS_1089 | GCS_223618 | GC_Serum |
| 1090 | GCS_1090 | GCS_213226 | GC_Serum |
| 1091 | GCS_1091 | GCS_309642 | GC_Serum |
| 1092 | GCS_1092 | GCS_200588 | GC_Serum |
| 1093 | GCS_1093 | GCS_415158 | GC_Serum |
| 1094 | GCS_1094 | GCS_428311 | GC_Serum |
| 1095 | GCS_1095 | GCS_204157 | GC_Serum |
| 1096 | GCS_1096 | GCS_415924 | GC_Serum |
| 1097 | GCS_1097 | GCS_231796 | GC_Serum |
| 1098 | GCS_1098 | GCS_203259 | GC_Serum |
| 1099 | GCS_1099 | GCS_415143 | GC_Serum |
| 1100 | GCS_1100 | GCS_237984 | GC_Serum |
| 1101 | GCS_1101 | GCS_309837 | GC_Serum |
| 1102 | GCS_1102 | GCS_307915 | GC_Serum |
| 1103 | GCS_1103 | GCS_223973 | GC_Serum |
| 1104 | GCS_1104 | GCS_273590 | GC_Serum |
| 1105 | GCS_1105 | GCS_214058 | GC_Serum |
| 1106 | GCS_1106 | GCS_238384 | GC_Serum |
| 1107 | GCS_1107 | GCS_269864 | GC_Serum |
| 1108 | GCS_1108 | GCS_474690 | GC_Serum |
| 1109 | GCS_1109 | GCS_218597 | GC_Serum |
| 1110 | GCS_1110 | GCS_272855 | GC_Serum |
| 1111 | GCS_1111 | GCS_337230 | GC_Serum |
| 1112 | GCS_1112 | GCS_228377 | GC_Serum |
| 1113 | GCS_1113 | GCS_232869 | GC_Serum |
| 1114 | GCS_1114 | GCS_203786 | GC_Serum |
| 1115 | GCS_1115 | GCS_288822 | GC_Serum |
| 1116 | GCS_1116 | GCS_201042 | GC_Serum |
| 1117 | GCS_1117 | GCS_236890 | GC_Serum |
| 1118 | GCS_1118 | GCS_211453 | GC_Serum |
| 1119 | GCS_1119 | GCS_225427 | GC_Serum |
| 1120 | GCS_1120 | GCS_337196 | GC_Serum |
| 1121 | GCS_1121 | GCS_217816 | GC_Serum |
| 1122 | GCS_1122 | GCS_200429 | GC_Serum |
| 1123 | GCS_1123 | GCS_455826 | GC_Serum |
| 1124 | GCS_1124 | GCS_273447 | GC_Serum |
| 1125 | GCS_1125 | GCS_475951 | GC_Serum |

|      |          |            |          |
|------|----------|------------|----------|
| 1126 | GCS_1126 | GCS_285340 | GC_Serum |
| 1127 | GCS_1127 | GCS_470289 | GC_Serum |
| 1128 | GCS_1128 | GCS_232660 | GC_Serum |
| 1129 | GCS_1129 | GCS_486192 | GC_Serum |
| 1130 | GCS_1130 | GCS_213961 | GC_Serum |
| 1131 | GCS_1131 | GCS_483487 | GC_Serum |
| 1132 | GCS_1132 | GCS_227318 | GC_Serum |
| 1133 | GCS_1133 | GCS_280546 | GC_Serum |
| 1134 | GCS_1134 | GCS_267884 | GC_Serum |
| 1135 | GCS_1135 | GCS_213960 | GC_Serum |
| 1136 | GCS_1136 | GCS_301399 | GC_Serum |
| 1137 | GCS_1137 | GCS_220010 | GC_Serum |
| 1138 | GCS_1138 | GCS_228546 | GC_Serum |
| 1139 | GCS_1139 | GCS_304945 | GC_Serum |
| 1140 | GCS_1140 | GCS_214535 | GC_Serum |
| 1141 | GCS_1141 | GCS_202681 | GC_Serum |
| 1142 | GCS_1142 | GCS_486884 | GC_Serum |
| 1143 | GCS_1143 | GCS_486024 | GC_Serum |
| 1144 | GCS_1144 | GCS_281910 | GC_Serum |
| 1145 | GCS_1145 | GCS_218483 | GC_Serum |
| 1146 | GCS_1146 | GCS_211952 | GC_Serum |
| 1147 | GCS_1147 | GCS_300920 | GC_Serum |
| 1148 | GCS_1148 | GCS_231657 | GC_Serum |
| 1149 | GCS_1149 | GCS_239577 | GC_Serum |
| 1150 | GCS_1150 | GCS_309540 | GC_Serum |
| 1151 | GCS_1151 | GCS_219510 | GC_Serum |
| 1152 | GCS_1152 | GCS_223625 | GC_Serum |
| 1153 | GCS_1153 | GCS_225430 | GC_Serum |
| 1154 | GCS_1154 | GCS_216838 | GC_Serum |
| 1155 | GCS_1155 | GCS_213296 | GC_Serum |
| 1156 | GCS_1156 | GCS_241097 | GC_Serum |
| 1157 | GCS_1157 | GCS_268313 | GC_Serum |
| 1158 | GCS_1158 | GCS_225446 | GC_Serum |
| 1159 | GCS_1159 | GCS_225882 | GC_Serum |
| 1160 | GCS_1160 | GCS_484345 | GC_Serum |
| 1161 | GCS_1161 | GCS_218694 | GC_Serum |
| 1162 | GCS_1162 | GCS_204425 | GC_Serum |
| 1163 | GCS_1163 | GCS_486179 | GC_Serum |
| 1164 | GCS_1164 | GCS_218724 | GC_Serum |
| 1165 | GCS_1165 | GCS_404516 | GC_Serum |
| 1166 | GCS_1166 | GCS_339455 | GC_Serum |
| 1167 | GCS_1167 | GCS_321685 | GC_Serum |
| 1168 | GCS_1168 | GCS_208723 | GC_Serum |
| 1169 | GCS_1169 | GCS_309949 | GC_Serum |
| 1170 | GCS_1170 | GCS_218512 | GC_Serum |
| 1171 | GCS_1171 | GCS_328803 | GC_Serum |
| 1172 | GCS_1172 | GCS_227017 | GC_Serum |
| 1173 | GCS_1173 | GCS_239565 | GC_Serum |
| 1174 | GCS_1174 | GCS_445039 | GC_Serum |
| 1175 | GCS_1175 | GCS_213697 | GC_Serum |
| 1176 | GCS_1176 | GCS_302351 | GC_Serum |
| 1177 | GCS_1177 | GCS_223521 | GC_Serum |
| 1178 | GCS_1178 | GCS_485464 | GC_Serum |
| 1179 | GCS_1179 | GCS_227951 | GC_Serum |
| 1180 | GCS_1180 | GCS_236725 | GC_Serum |
| 1181 | GCS_1181 | GCS_474686 | GC_Serum |
| 1182 | GCS_1182 | GCS_308192 | GC_Serum |
| 1183 | GCS_1183 | GCS_310667 | GC_Serum |
| 1184 | GCS_1184 | GCS_470283 | GC_Serum |
| 1185 | GCS_1185 | GCS_273170 | GC_Serum |
| 1186 | GCS_1186 | GCS_218951 | GC_Serum |
| 1187 | GCS_1187 | GCS_206556 | GC_Serum |

|      |          |            |          |
|------|----------|------------|----------|
| 1188 | GCS_1188 | GCS_357010 | GC_Serum |
| 1189 | GCS_1189 | GCS_227983 | GC_Serum |
| 1190 | GCS_1190 | GCS_268445 | GC_Serum |
| 1191 | GCS_1191 | GCS_295046 | GC_Serum |
| 1192 | GCS_1192 | GCS_201862 | GC_Serum |
| 1193 | GCS_1193 | GCS_226901 | GC_Serum |
| 1194 | GCS_1194 | GCS_200906 | GC_Serum |
| 1195 | GCS_1195 | GCS_357211 | GC_Serum |
| 1196 | GCS_1196 | GCS_327918 | GC_Serum |
| 1197 | GCS_1197 | GCS_223548 | GC_Serum |
| 1198 | GCS_1198 | GCS_428330 | GC_Serum |
| 1199 | GCS_1199 | GCS_476951 | GC_Serum |
| 1200 | GCS_1200 | GCS_241307 | GC_Serum |
| 1201 | GCS_1201 | GCS_356987 | GC_Serum |
| 1202 | GCS_1202 | GCS_356938 | GC_Serum |
| 1203 | GCS_1203 | GCS_228612 | GC_Serum |
| 1204 | GCS_1204 | GCS_274743 | GC_Serum |
| 1205 | GCS_1205 | GCS_228594 | GC_Serum |
| 1206 | GCS_1206 | GCS_281268 | GC_Serum |
| 1207 | GCS_1207 | GCS_269625 | GC_Serum |
| 1208 | GCS_1208 | GCS_480140 | GC_Serum |
| 1209 | GCS_1209 | GCS_227761 | GC_Serum |
| 1210 | GCS_1210 | GCS_221505 | GC_Serum |
| 1211 | GCS_1211 | GCS_208664 | GC_Serum |
| 1212 | GCS_1212 | GCS_201887 | GC_Serum |
| 1213 | GCS_1213 | GCS_233365 | GC_Serum |
| 1214 | GCS_1214 | GCS_241087 | GC_Serum |
| 1215 | GCS_1215 | GCS_277432 | GC_Serum |
| 1216 | GCS_1216 | GCS_231850 | GC_Serum |
| 1217 | GCS_1217 | GCS_388098 | GC_Serum |
| 1218 | GCS_1218 | GCS_241319 | GC_Serum |
| 1219 | GCS_1219 | GCS_233455 | GC_Serum |
| 1220 | GCS_1220 | GCS_220012 | GC_Serum |
| 1221 | GCS_1221 | GCS_205680 | GC_Serum |
| 1222 | GCS_1222 | GCS_229954 | GC_Serum |
| 1223 | GCS_1223 | GCS_268083 | GC_Serum |
| 1224 | GCS_1224 | GCS_199337 | GC_Serum |
| 1225 | GCS_1225 | GCS_295226 | GC_Serum |
| 1226 | GCS_1226 | GCS_300379 | GC_Serum |
| 1227 | GCS_1227 | GCS_280564 | GC_Serum |
| 1228 | GCS_1228 | GCS_321696 | GC_Serum |
| 1229 | GCS_1229 | GCS_268457 | GC_Serum |
| 1230 | GCS_1230 | GCS_231945 | GC_Serum |
| 1231 | GCS_1231 | GCS_223597 | GC_Serum |
| 1232 | GCS_1232 | GCS_215978 | GC_Serum |
| 1233 | GCS_1233 | GCS_211891 | GC_Serum |
| 1234 | GCS_1234 | GCS_211997 | GC_Serum |
| 1235 | GCS_1235 | GCS_267647 | GC_Serum |
| 1236 | GCS_1236 | GCS_274189 | GC_Serum |
| 1237 | GCS_1237 | GCS_225863 | GC_Serum |
| 1238 | GCS_1238 | GCS_416140 | GC_Serum |
| 1239 | GCS_1239 | GCS_271128 | GC_Serum |
| 1240 | GCS_1240 | GCS_437266 | GC_Serum |
| 1241 | GCS_1241 | GCS_330990 | GC_Serum |
| 1242 | GCS_1242 | GCS_359447 | GC_Serum |
| 1243 | GCS_1243 | GCS_438109 | GC_Serum |
| 1244 | GCS_1244 | GCS_272880 | GC_Serum |
| 1245 | GCS_1245 | GCS_232075 | GC_Serum |
| 1246 | GCS_1246 | GCS_242526 | GC_Serum |
| 1247 | GCS_1247 | GCS_207684 | GC_Serum |
| 1248 | GCS_1248 | GCS_268506 | GC_Serum |
| 1249 | GCS_1249 | GCS_222199 | GC_Serum |

|      |          |                                            |          |
|------|----------|--------------------------------------------|----------|
| 1250 | GCS_1250 | GCS_299159                                 | GC_Serum |
| 1251 | GCS_1251 | GCS_233174                                 | GC_Serum |
| 1252 | GCS_1252 | GCS_200490                                 | GC_Serum |
| 1253 | GCS_1253 | GCS_268100                                 | GC_Serum |
| 1254 | GCS_1254 | GCS_226272                                 | GC_Serum |
| 1255 | GCS_1255 | GCS_228147                                 | GC_Serum |
| 1256 | GCS_1256 | GCS_331132                                 | GC_Serum |
| 1257 | GCS_1257 | GCS_276947                                 | GC_Serum |
| 1258 | GCS_1258 | GCS_309791                                 | GC_Serum |
| 1259 | GCS_1259 | GCS_215494                                 | GC_Serum |
| 1260 | GCS_1260 | GCS_368022                                 | GC_Serum |
| 1261 | GCS_1261 | GCS_330991                                 | GC_Serum |
| 1262 | GCS_1262 | GCS_233011                                 | GC_Serum |
| 1263 | GCS_1263 | GCS_281419                                 | GC_Serum |
| 1264 | GCS_1264 | GCU_xylose 2                               | GC_Urine |
| 1265 | GCS_1265 | GCU_xylitol                                | GC_Urine |
| 1266 | GCS_1266 | GCU_xanthurenic acid                       | GC_Urine |
| 1267 | GCU_1267 | GCU_xanthosine                             | GC_Urine |
| 1268 | GCU_1268 | GCU_xanthine                               | GC_Urine |
| 1269 | GCU_1269 | GCU_vanillic acid                          | GC_Urine |
| 1270 | GCU_1270 | GCU_valine TMS1x                           | GC_Urine |
| 1271 | GCU_1271 | GCU_valine                                 | GC_Urine |
| 1272 | GCU_1272 | GCU_urocanic acid                          | GC_Urine |
| 1273 | GCU_1273 | GCU_uric acid (mix spec with myo-inositol) | GC_Urine |
| 1274 | GCU_1274 | GCU_urea                                   | GC_Urine |
| 1275 | GCU_1275 | GCU_uracil                                 | GC_Urine |
| 1276 | GCU_1276 | GCU_UDP-glucuronic acid                    | GC_Urine |
| 1277 | GCU_1277 | GCU_tyrosine mz147 missing                 | GC_Urine |
| 1278 | GCU_1278 | GCU_tyrosine minor                         | GC_Urine |
| 1279 | GCU_1279 | GCU_tryptophan minor                       | GC_Urine |
| 1280 | GCU_1280 | GCU_tryptophan                             | GC_Urine |
| 1281 | GCU_1281 | GCU_trigonelline NIST                      | GC_Urine |
| 1282 | GCU_1282 | GCU_thymine                                | GC_Urine |
| 1283 | GCU_1283 | GCU_thymidine 2                            | GC_Urine |
| 1284 | GCU_1284 | GCU_threose meox2                          | GC_Urine |
| 1285 | GCU_1285 | GCU_threonine minor                        | GC_Urine |
| 1286 | GCU_1286 | GCU_threonine                              | GC_Urine |
| 1287 | GCU_1287 | GCU_threonic acid 1                        | GC_Urine |
| 1288 | GCU_1288 | GCU_tartaric acid                          | GC_Urine |
| 1289 | GCU_1289 | GCU_talose                                 | GC_Urine |
| 1290 | GCU_1290 | GCU_syringic acid                          | GC_Urine |
| 1291 | GCU_1291 | GCU_synephrine minor                       | GC_Urine |
| 1292 | GCU_1292 | GCU_sulfuric acid                          | GC_Urine |
| 1293 | GCU_1293 | GCU_succinic acid                          | GC_Urine |
| 1294 | GCU_1294 | GCU_stearic acid                           | GC_Urine |
| 1295 | GCU_1295 | GCU_sorbitol                               | GC_Urine |
| 1296 | GCU_1296 | GCU_sophorose minor                        | GC_Urine |
| 1297 | GCU_1297 | GCU_sophorose                              | GC_Urine |
| 1298 | GCU_1298 | GCU_(s)-(+)-mandelic acid                  | GC_Urine |
| 1299 | GCU_1299 | GCU_shikimic acid                          | GC_Urine |
| 1300 | GCU_1300 | GCU_serine minor                           | GC_Urine |
| 1301 | GCU_1301 | GCU_salicylic acid                         | GC_Urine |
| 1302 | GCU_1302 | GCU_ribose                                 | GC_Urine |
| 1303 | GCU_1303 | GCU_ribonic acid                           | GC_Urine |
| 1304 | GCU_1304 | GCU_ribitol                                | GC_Urine |
| 1305 | GCU_1305 | GCU_rhamnose 1                             | GC_Urine |
| 1306 | GCU_1306 | GCU_quinolinic acid                        | GC_Urine |
| 1307 | GCU_1307 | GCU_pyruvic acid                           | GC_Urine |
| 1308 | GCU_1308 | GCU_pyrophosphate                          | GC_Urine |
| 1309 | GCU_1309 | GCU_pyrogallol                             | GC_Urine |
| 1310 | GCU_1310 | GCU_propane-1,3-diol NIST                  | GC_Urine |
| 1311 | GCU_1311 | GCU_pimelic acid                           | GC_Urine |

|      |          |                                                              |          |
|------|----------|--------------------------------------------------------------|----------|
| 1312 | GCU_1312 | GCU_phthalic acid                                            | GC_Urine |
| 1313 | GCU_1313 | GCU_phosphoric acid                                          | GC_Urine |
| 1314 | GCU_1314 | GCU_phosphoric acid                                          | GC_Urine |
| 1315 | GCU_1315 | GCU_phosphoethanolamine                                      | GC_Urine |
| 1316 | GCU_1316 | GCU_phenylalanine TMS1x                                      | GC_Urine |
| 1317 | GCU_1317 | GCU_phenylalanine                                            | GC_Urine |
| 1318 | GCU_1318 | GCU_phenol                                                   | GC_Urine |
| 1319 | GCU_1319 | GCU_pentitol                                                 | GC_Urine |
| 1320 | GCU_1320 | GCU_pelargonic acid                                          | GC_Urine |
| 1321 | GCU_1321 | GCU_paracetamol                                              | GC_Urine |
| 1322 | GCU_1322 | GCU_parabanic acid NIST                                      | GC_Urine |
| 1323 | GCU_1323 | GCU_pantothenic acid                                         | GC_Urine |
| 1324 | GCU_1324 | GCU_palmitic acid                                            | GC_Urine |
| 1325 | GCU_1325 | GCU_palatinose                                               | GC_Urine |
| 1326 | GCU_1326 | GCU_palatinitol                                              | GC_Urine |
| 1327 | GCU_1327 | GCU_oxoproline                                               | GC_Urine |
| 1328 | GCU_1328 | GCU_oxalic acid                                              | GC_Urine |
| 1329 | GCU_1329 | GCU_orotic acid                                              | GC_Urine |
| 1330 | GCU_1330 | GCU_oleic acid                                               | GC_Urine |
| 1331 | GCU_1331 | GCU_octadecanol                                              | GC_Urine |
| 1332 | GCU_1332 | GCU_noradrenaline                                            | GC_Urine |
| 1333 | GCU_1333 | GCU_nicotinamide                                             | GC_Urine |
| 1334 | GCU_1334 | GCU_n-epsilon-trimethyllysine                                | GC_Urine |
| 1335 | GCU_1335 | GCU_N-carbamylglutamate                                      | GC_Urine |
| 1336 | GCU_1336 | GCU_naproxen                                                 | GC_Urine |
| 1337 | GCU_1337 | GCU_N-acetyl-glutamic acid                                   | GC_Urine |
| 1338 | GCU_1338 | GCU_N-acetylglutamate                                        | GC_Urine |
| 1339 | GCU_1339 | GCU_N-acetyl-D-mannosamine major                             | GC_Urine |
| 1340 | GCU_1340 | GCU_N-acetyl-D-hexosamine                                    | GC_Urine |
| 1341 | GCU_1341 | GCU_N-acetylaspartic acid 1                                  | GC_Urine |
| 1342 | GCU_1342 | GCU_myristic acid                                            | GC_Urine |
| 1343 | GCU_1343 | GCU_methylmaleic acid                                        | GC_Urine |
| 1344 | GCU_1344 | GCU_methylhexose NIST                                        | GC_Urine |
| 1345 | GCU_1345 | GCU_methylhexadecanoic acid                                  | GC_Urine |
| 1346 | GCU_1346 | GCU_methylcitrate                                            | GC_Urine |
| 1347 | GCU_1347 | GCU_melibiose                                                | GC_Urine |
| 1348 | GCU_1348 | GCU_mannose-6-phosphate NIST                                 | GC_Urine |
| 1349 | GCU_1349 | GCU_mannitol                                                 | GC_Urine |
| 1350 | GCU_1350 | GCU_maltose-like                                             | GC_Urine |
| 1351 | GCU_1351 | GCU_maltose 1                                                | GC_Urine |
| 1352 | GCU_1352 | GCU_malonic acid                                             | GC_Urine |
| 1353 | GCU_1353 | GCU_malic acid                                               | GC_Urine |
| 1354 | GCU_1354 | GCU_maleic acid                                              | GC_Urine |
| 1355 | GCU_1355 | GCU_lysinine                                                 | GC_Urine |
| 1356 | GCU_1356 | GCU_levoglucosan                                             | GC_Urine |
| 1357 | GCU_1357 | GCU_levanbiose                                               | GC_Urine |
| 1358 | GCU_1358 | GCU_leucine                                                  | GC_Urine |
| 1359 | GCU_1359 | GCU_lauric acid                                              | GC_Urine |
| 1360 | GCU_1360 | GCU_lactobionic acid                                         | GC_Urine |
| 1361 | GCU_1361 | GCU_lactic acid                                              | GC_Urine |
| 1362 | GCU_1362 | GCU_kynurenine                                               | GC_Urine |
| 1363 | GCU_1363 | GCU_isorhamnose                                              | GC_Urine |
| 1364 | GCU_1364 | GCU_isoleucine minor                                         | GC_Urine |
| 1365 | GCU_1365 | GCU_isocitric lactone                                        | GC_Urine |
| 1366 | GCU_1366 | GCU_isocitric acid                                           | GC_Urine |
| 1367 | GCU_1367 | GCU_inositol myo-                                            | GC_Urine |
| 1368 | GCU_1368 | GCU_inosine                                                  | GC_Urine |
| 1369 | GCU_1369 | GCU_indole-3-lactate                                         | GC_Urine |
| 1370 | GCU_1370 | GCU_indole-3-acetate                                         | GC_Urine |
| 1371 | GCU_1371 | GCU_idonic acid NIST                                         | GC_Urine |
| 1372 | GCU_1372 | GCU_hydroxylamine                                            | GC_Urine |
| 1373 | GCU_1373 | GCU_homovanillic and 4-hydroxymandelic acid - mixed spectrum | GC_Urine |

|      |          |                                               |          |
|------|----------|-----------------------------------------------|----------|
| 1374 | GCU_1374 | GCU_homoserine                                | GC_Urine |
| 1375 | GCU_1375 | GCU_homogentisic acid                         | GC_Urine |
| 1376 | GCU_1376 | GCU_histidine                                 | GC_Urine |
| 1377 | GCU_1377 | GCU_hippuric acid 1TMS                        | GC_Urine |
| 1378 | GCU_1378 | GCU_guanine                                   | GC_Urine |
| 1379 | GCU_1379 | GCU_glyoxalurea NIST                          | GC_Urine |
| 1380 | GCU_1380 | GCU_glycyl proline                            | GC_Urine |
| 1381 | GCU_1381 | GCU_glycolic acid                             | GC_Urine |
| 1382 | GCU_1382 | GCU_glycocyamine major                        | GC_Urine |
| 1383 | GCU_1383 | GCU_glycine TMS1x                             | GC_Urine |
| 1384 | GCU_1384 | GCU_glycerol-alpha-phosphate                  | GC_Urine |
| 1385 | GCU_1385 | GCU_glyceric acid                             | GC_Urine |
| 1386 | GCU_1386 | GCU_glutaric acid                             | GC_Urine |
| 1387 | GCU_1387 | GCU_glutamine dehydrated 2TMS minor           | GC_Urine |
| 1388 | GCU_1388 | GCU_glutamine                                 | GC_Urine |
| 1389 | GCU_1389 | GCU_glutamate TMS2x                           | GC_Urine |
| 1390 | GCU_1390 | GCU_glucose 2                                 | GC_Urine |
| 1391 | GCU_1391 | GCU_glucose-1-phosphate                       | GC_Urine |
| 1392 | GCU_1392 | GCU_glucose 1                                 | GC_Urine |
| 1393 | GCU_1393 | GCU_gluconic acid lactone                     | GC_Urine |
| 1394 | GCU_1394 | GCU_gluconic acid                             | GC_Urine |
| 1395 | GCU_1395 | GCU_galacturonic acid 2                       | GC_Urine |
| 1396 | GCU_1396 | GCU_galacturonic acid                         | GC_Urine |
| 1397 | GCU_1397 | GCU_galactose                                 | GC_Urine |
| 1398 | GCU_1398 | GCU_galactonic acid                           | GC_Urine |
| 1399 | GCU_1399 | GCU_galactitol                                | GC_Urine |
| 1400 | GCU_1400 | GCU_galactinol minor 2                        | GC_Urine |
| 1401 | GCU_1401 | GCU_galactinol major 2                        | GC_Urine |
| 1402 | GCU_1402 | GCU_galactinol 3                              | GC_Urine |
| 1403 | GCU_1403 | GCU_galactinol 2                              | GC_Urine |
| 1404 | GCU_1404 | GCU_galactinol 1                              | GC_Urine |
| 1405 | GCU_1405 | GCU_furoylglycine NIST                        | GC_Urine |
| 1406 | GCU_1406 | GCU_fumaric acid                              | GC_Urine |
| 1407 | GCU_1407 | GCU_fucose                                    | GC_Urine |
| 1408 | GCU_1408 | GCU_fructose 2                                | GC_Urine |
| 1409 | GCU_1409 | GCU_fructose 1                                | GC_Urine |
| 1410 | GCU_1410 | GCU_FAME marker very close to sorbitol        | GC_Urine |
| 1411 | GCU_1411 | GCU_ethanolamine                              | GC_Urine |
| 1412 | GCU_1412 | GCU_erythronic acid lactone                   | GC_Urine |
| 1413 | GCU_1413 | GCU_erythronic acid lactone                   | GC_Urine |
| 1414 | GCU_1414 | GCU_erythritol                                | GC_Urine |
| 1415 | GCU_1415 | GCU_enolpyruvate NIST                         | GC_Urine |
| 1416 | GCU_1416 | GCU_dodecane                                  | GC_Urine |
| 1417 | GCU_1417 | GCU_DL-4-hydroxymandelonitrile major_R1570313 | GC_Urine |
| 1418 | GCU_1418 | GCU_dihydro-3-coumaric acid                   | GC_Urine |
| 1419 | GCU_1419 | GCU_digalacturonic acid                       | GC_Urine |
| 1420 | GCU_1420 | GCU_dehydroascorbic acid                      | GC_Urine |
| 1421 | GCU_1421 | GCU_dehydroascorbate 3                        | GC_Urine |
| 1422 | GCU_1422 | GCU_cytidine-5-monophosphate NIST             | GC_Urine |
| 1423 | GCU_1423 | GCU_cystine minor                             | GC_Urine |
| 1424 | GCU_1424 | GCU_cystine                                   | GC_Urine |
| 1425 | GCU_1425 | GCU_cysteine                                  | GC_Urine |
| 1426 | GCU_1426 | GCU_cyclohexylamine NIST                      | GC_Urine |
| 1427 | GCU_1427 | GCU_creatinine                                | GC_Urine |
| 1428 | GCU_1428 | GCU_coniferin NIST                            | GC_Urine |
| 1429 | GCU_1429 | GCU_citrulline                                | GC_Urine |
| 1430 | GCU_1430 | GCU_citric acid                               | GC_Urine |
| 1431 | GCU_1431 | GCU_citramalic acid                           | GC_Urine |
| 1432 | GCU_1432 | GCU_chlorogenic acid                          | GC_Urine |
| 1433 | GCU_1433 | GCU_cellobiotol                               | GC_Urine |
| 1434 | GCU_1434 | GCU_cellobiose                                | GC_Urine |
| 1435 | GCU_1435 | GCU_caprylic acid                             | GC_Urine |

|      |          |                                          |          |
|------|----------|------------------------------------------|----------|
| 1436 | GCU_1436 | GCU_capric acid                          | GC_Urine |
| 1437 | GCU_1437 | GCU_caffeic acid                         | GC_Urine |
| 1438 | GCU_1438 | GCU_butyrolactam NIST                    | GC_Urine |
| 1439 | GCU_1439 | GCU_butane-2,3-diol (NIST)               | GC_Urine |
| 1440 | GCU_1440 | GCU_beta-gentiobiose minor               | GC_Urine |
| 1441 | GCU_1441 | GCU_beta-gentiobiose                     | GC_Urine |
| 1442 | GCU_1442 | GCU_beta-gentiobiose                     | GC_Urine |
| 1443 | GCU_1443 | GCU_beta-alanine                         | GC_Urine |
| 1444 | GCU_1444 | GCU_benzylalcohol                        | GC_Urine |
| 1445 | GCU_1445 | GCU_benzoic acid mix spec                | GC_Urine |
| 1446 | GCU_1446 | GCU_azelaic acid                         | GC_Urine |
| 1447 | GCU_1447 | GCU_aspartic acid                        | GC_Urine |
| 1448 | GCU_1448 | GCU_aspartate minor                      | GC_Urine |
| 1449 | GCU_1449 | GCU_asparagine dehydrated                | GC_Urine |
| 1450 | GCU_1450 | GCU_asparagine                           | GC_Urine |
| 1451 | GCU_1451 | GCU_ascorbic acid                        | GC_Urine |
| 1452 | GCU_1452 | GCU_arabitol                             | GC_Urine |
| 1453 | GCU_1453 | GCU_arabinose                            | GC_Urine |
| 1454 | GCU_1454 | GCU_aminomalonic acid                    | GC_Urine |
| 1455 | GCU_1455 | GCU_allantoic acid -H2O                  | GC_Urine |
| 1456 | GCU_1456 | GCU_alanine                              | GC_Urine |
| 1457 | GCU_1457 | GCU_adipic acid                          | GC_Urine |
| 1458 | GCU_1458 | GCU_adenosine                            | GC_Urine |
| 1459 | GCU_1459 | GCU_adenine                              | GC_Urine |
| 1460 | GCU_1460 | GCU_aconitic acid                        | GC_Urine |
| 1461 | GCU_1461 | GCU_acetophenone NIST                    | GC_Urine |
| 1462 | GCU_1462 | GCU_7-methylguanine NIST                 | GC_Urine |
| 1463 | GCU_1463 | GCU_6-deoxyglucitol NIST                 | GC_Urine |
| 1464 | GCU_1464 | GCU_5-methoxytryptamine                  | GC_Urine |
| 1465 | GCU_1465 | GCU_5-hydroxymethyl-2-furoic acid NIST   | GC_Urine |
| 1466 | GCU_1466 | GCU_5-hydroxyindole-3-acetic acid NIST   | GC_Urine |
| 1467 | GCU_1467 | GCU_5-hydroxy-3-indoleacetic acid        | GC_Urine |
| 1468 | GCU_1468 | GCU_5'-deoxy-5'-methylthioadenosine      | GC_Urine |
| 1469 | GCU_1469 | GCU_5-aminovaleric acid lactame          | GC_Urine |
| 1470 | GCU_1470 | GCU_5,6-dihydrouracil                    | GC_Urine |
| 1471 | GCU_1471 | GCU_4-hydroxyphenyllactic acid           | GC_Urine |
| 1472 | GCU_1472 | GCU_4-hydroxyphenylacetic acid           | GC_Urine |
| 1473 | GCU_1473 | GCU_4-hydroxyhippuric acid NIST          | GC_Urine |
| 1474 | GCU_1474 | GCU_4-hydroxybutyric acid                | GC_Urine |
| 1475 | GCU_1475 | GCU_4-hydroxybenzoate                    | GC_Urine |
| 1476 | GCU_1476 | GCU_2-hydroxyvaleric acid                | GC_Urine |
| 1477 | GCU_1477 | GCU_2-hydroxy-2-methylbutanoic acid      | GC_Urine |
| 1478 | GCU_1478 | GCU_2-hydroxybutanoic acid               | GC_Urine |
| 1479 | GCU_1479 | GCU_3-hydroxybutanoic acid mix spec      | GC_Urine |
| 1480 | GCU_1480 | GCU_3-hydroxypyridine                    | GC_Urine |
| 1481 | GCU_1481 | GCU_3-phosphoglycerate                   | GC_Urine |
| 1482 | GCU_1482 | GCU_3-hydroxypropionic acid              | GC_Urine |
| 1483 | GCU_1483 | GCU_1-methylinosine NIST                 | GC_Urine |
| 1484 | GCU_1484 | GCU_1,5-anhydroglucitol                  | GC_Urine |
| 1485 | GCU_1485 | GCU_3-aminoisobutyric acid 1             | GC_Urine |
| 1486 | GCU_1486 | GCU_3-aminoisobutyric acid               | GC_Urine |
| 1487 | GCU_1487 | GCU_3,4-dihydroxyphenylacetic acid       | GC_Urine |
| 1488 | GCU_1488 | GCU_2-isopropylmalic acid                | GC_Urine |
| 1489 | GCU_1489 | GCU_2-aminoadipic acid                   | GC_Urine |
| 1490 | GCU_1490 | GCU_2-hydroxyglutaric acid               | GC_Urine |
| 1491 | GCU_1491 | GCU_3-Arylcarbonyl-alanine NIST          | GC_Urine |
| 1492 | GCU_1492 | GCU_3,4-dihydroxyhydrocinnamic acid NIST | GC_Urine |
| 1493 | GCU_1493 | GCU_1-methyladenosine                    | GC_Urine |
| 1494 | GCU_1494 | GCU_2-monostearin NIST                   | GC_Urine |
| 1495 | GCU_1495 | GCU_2-deoxyribonic acid                  | GC_Urine |
| 1496 | GCU_1496 | GCU_3-methyl-1-oxobutylglycine NIST      | GC_Urine |
| 1497 | GCU_1497 | GCU_2-deoxyerythritol NIST               | GC_Urine |



|      |          |                                                      |          |
|------|----------|------------------------------------------------------|----------|
| 1498 | GCU_1498 | GCU_3-hydroxy-3-indoleacetic acid                    | GC_Urine |
| 1499 | GCU_1499 | GCU_3-hydroxy-3-methylglutaric acid                  | GC_Urine |
| 1500 | GCU_1500 | GCU_2-deoxytetronic acid NIST                        | GC_Urine |
| 1501 | GCU_1501 | GCU_2-deoxytetronic acid                             | GC_Urine |
| 1502 | GCU_1502 | GCU_3-ureidopropionate                               | GC_Urine |
| 1503 | GCU_1503 | GCU_1,2,4-benzenetriol                               | GC_Urine |
| 1504 | GCU_1504 | GCU_3-(3-hydroxyphenyl)-3-hydroxypropionic acid NIST | GC_Urine |
| 1505 | GCU_1505 | GCU_2-hydroxyhippuric acid                           | GC_Urine |
| 1506 | GCU_1506 | GCU_227983                                           | GC_Urine |
| 1507 | GCU_1507 | GCU_225871                                           | GC_Urine |
| 1508 | GCU_1508 | GCU_308347                                           | GC_Urine |
| 1509 | GCU_1509 | GCU_483228                                           | GC_Urine |
| 1510 | GCU_1510 | GCU_483175                                           | GC_Urine |
| 1511 | GCU_1511 | GCU_483171                                           | GC_Urine |
| 1512 | GCU_1512 | GCU_480180                                           | GC_Urine |
| 1513 | GCU_1513 | GCU_480140                                           | GC_Urine |
| 1514 | GCU_1514 | GCU_480136                                           | GC_Urine |
| 1515 | GCU_1515 | GCU_480050                                           | GC_Urine |
| 1516 | GCU_1516 | GCU_479939                                           | GC_Urine |
| 1517 | GCU_1517 | GCU_479886                                           | GC_Urine |
| 1518 | GCU_1518 | GCU_477827                                           | GC_Urine |
| 1519 | GCU_1519 | GCU_476079                                           | GC_Urine |
| 1520 | GCU_1520 | GCU_476001                                           | GC_Urine |
| 1521 | GCU_1521 | GCU_475976                                           | GC_Urine |
| 1522 | GCU_1522 | GCU_475968                                           | GC_Urine |
| 1523 | GCU_1523 | GCU_475951                                           | GC_Urine |
| 1524 | GCU_1524 | GCU_474686                                           | GC_Urine |
| 1525 | GCU_1525 | GCU_473067                                           | GC_Urine |
| 1526 | GCU_1526 | GCU_470527                                           | GC_Urine |
| 1527 | GCU_1527 | GCU_470290                                           | GC_Urine |
| 1528 | GCU_1528 | GCU_470289                                           | GC_Urine |
| 1529 | GCU_1529 | GCU_470283                                           | GC_Urine |
| 1530 | GCU_1530 | GCU_470270                                           | GC_Urine |
| 1531 | GCU_1531 | GCU_466853                                           | GC_Urine |
| 1532 | GCU_1532 | GCU_466167                                           | GC_Urine |
| 1533 | GCU_1533 | GCU_462485                                           | GC_Urine |
| 1534 | GCU_1534 | GCU_460930                                           | GC_Urine |
| 1535 | GCU_1535 | GCU_455826                                           | GC_Urine |
| 1536 | GCU_1536 | GCU_448997                                           | GC_Urine |
| 1537 | GCU_1537 | GCU_446665                                           | GC_Urine |
| 1538 | GCU_1538 | GCU_446633                                           | GC_Urine |
| 1539 | GCU_1539 | GCU_446628                                           | GC_Urine |
| 1540 | GCU_1540 | GCU_446067                                           | GC_Urine |
| 1541 | GCU_1541 | GCU_445039                                           | GC_Urine |
| 1542 | GCU_1542 | GCU_438061                                           | GC_Urine |
| 1543 | GCU_1543 | GCU_438058                                           | GC_Urine |
| 1544 | GCU_1544 | GCU_437471                                           | GC_Urine |
| 1545 | GCU_1545 | GCU_437284                                           | GC_Urine |
| 1546 | GCU_1546 | GCU_437266                                           | GC_Urine |
| 1547 | GCU_1547 | GCU_429880                                           | GC_Urine |
| 1548 | GCU_1548 | GCU_428330                                           | GC_Urine |
| 1549 | GCU_1549 | GCU_428311                                           | GC_Urine |
| 1550 | GCU_1550 | GCU_425836                                           | GC_Urine |
| 1551 | GCU_1551 | GCU_424905                                           | GC_Urine |
| 1552 | GCU_1552 | GCU_420446                                           | GC_Urine |
| 1553 | GCU_1553 | GCU_419655                                           | GC_Urine |
| 1554 | GCU_1554 | GCU_417631                                           | GC_Urine |
| 1555 | GCU_1555 | GCU_417496                                           | GC_Urine |
| 1556 | GCU_1556 | GCU_416114                                           | GC_Urine |
| 1557 | GCU_1557 | GCU_415158                                           | GC_Urine |
| 1558 | GCU_1558 | GCU_411083                                           | GC_Urine |
| 1559 | GCU_1559 | GCU_411049                                           | GC_Urine |

|      |          |            |          |
|------|----------|------------|----------|
| 1560 | GCU_1560 | GCU_409349 | GC_Urine |
| 1561 | GCU_1561 | GCU_408731 | GC_Urine |
| 1562 | GCU_1562 | GCU_408618 | GC_Urine |
| 1563 | GCU_1563 | GCU_408490 | GC_Urine |
| 1564 | GCU_1564 | GCU_407536 | GC_Urine |
| 1565 | GCU_1565 | GCU_407508 | GC_Urine |
| 1566 | GCU_1566 | GCU_404516 | GC_Urine |
| 1567 | GCU_1567 | GCU_404287 | GC_Urine |
| 1568 | GCU_1568 | GCU_400671 | GC_Urine |
| 1569 | GCU_1569 | GCU_393241 | GC_Urine |
| 1570 | GCU_1570 | GCU_393073 | GC_Urine |
| 1571 | GCU_1571 | GCU_393031 | GC_Urine |
| 1572 | GCU_1572 | GCU_385112 | GC_Urine |
| 1573 | GCU_1573 | GCU_385028 | GC_Urine |
| 1574 | GCU_1574 | GCU_384918 | GC_Urine |
| 1575 | GCU_1575 | GCU_384908 | GC_Urine |
| 1576 | GCU_1576 | GCU_382318 | GC_Urine |
| 1577 | GCU_1577 | GCU_375558 | GC_Urine |
| 1578 | GCU_1578 | GCU_374912 | GC_Urine |
| 1579 | GCU_1579 | GCU_374901 | GC_Urine |
| 1580 | GCU_1580 | GCU_374786 | GC_Urine |
| 1581 | GCU_1581 | GCU_373743 | GC_Urine |
| 1582 | GCU_1582 | GCU_373725 | GC_Urine |
| 1583 | GCU_1583 | GCU_372993 | GC_Urine |
| 1584 | GCU_1584 | GCU_369589 | GC_Urine |
| 1585 | GCU_1585 | GCU_368323 | GC_Urine |
| 1586 | GCU_1586 | GCU_368170 | GC_Urine |
| 1587 | GCU_1587 | GCU_368056 | GC_Urine |
| 1588 | GCU_1588 | GCU_368034 | GC_Urine |
| 1589 | GCU_1589 | GCU_368028 | GC_Urine |
| 1590 | GCU_1590 | GCU_368026 | GC_Urine |
| 1591 | GCU_1591 | GCU_368021 | GC_Urine |
| 1592 | GCU_1592 | GCU_368012 | GC_Urine |
| 1593 | GCU_1593 | GCU_368008 | GC_Urine |
| 1594 | GCU_1594 | GCU_368004 | GC_Urine |
| 1595 | GCU_1595 | GCU_367999 | GC_Urine |
| 1596 | GCU_1596 | GCU_367997 | GC_Urine |
| 1597 | GCU_1597 | GCU_367993 | GC_Urine |
| 1598 | GCU_1598 | GCU_367979 | GC_Urine |
| 1599 | GCU_1599 | GCU_367954 | GC_Urine |
| 1600 | GCU_1600 | GCU_367950 | GC_Urine |
| 1601 | GCU_1601 | GCU_367924 | GC_Urine |
| 1602 | GCU_1602 | GCU_367923 | GC_Urine |
| 1603 | GCU_1603 | GCU_362147 | GC_Urine |
| 1604 | GCU_1604 | GCU_362120 | GC_Urine |
| 1605 | GCU_1605 | GCU_362088 | GC_Urine |
| 1606 | GCU_1606 | GCU_362075 | GC_Urine |
| 1607 | GCU_1607 | GCU_362015 | GC_Urine |
| 1608 | GCU_1608 | GCU_362005 | GC_Urine |
| 1609 | GCU_1609 | GCU_359507 | GC_Urine |
| 1610 | GCU_1610 | GCU_359447 | GC_Urine |
| 1611 | GCU_1611 | GCU_358726 | GC_Urine |
| 1612 | GCU_1612 | GCU_358146 | GC_Urine |
| 1613 | GCU_1613 | GCU_357685 | GC_Urine |
| 1614 | GCU_1614 | GCU_357492 | GC_Urine |
| 1615 | GCU_1615 | GCU_357337 | GC_Urine |
| 1616 | GCU_1616 | GCU_357304 | GC_Urine |
| 1617 | GCU_1617 | GCU_357211 | GC_Urine |
| 1618 | GCU_1618 | GCU_357045 | GC_Urine |
| 1619 | GCU_1619 | GCU_357010 | GC_Urine |
| 1620 | GCU_1620 | GCU_356938 | GC_Urine |
| 1621 | GCU_1621 | GCU_353499 | GC_Urine |

|      |          |            |          |
|------|----------|------------|----------|
| 1622 | GCU_1622 | GCU_352777 | GC_Urine |
| 1623 | GCU_1623 | GCU_352750 | GC_Urine |
| 1624 | GCU_1624 | GCU_352745 | GC_Urine |
| 1625 | GCU_1625 | GCU_352678 | GC_Urine |
| 1626 | GCU_1626 | GCU_350773 | GC_Urine |
| 1627 | GCU_1627 | GCU_349887 | GC_Urine |
| 1628 | GCU_1628 | GCU_349090 | GC_Urine |
| 1629 | GCU_1629 | GCU_349036 | GC_Urine |
| 1630 | GCU_1630 | GCU_349029 | GC_Urine |
| 1631 | GCU_1631 | GCU_349005 | GC_Urine |
| 1632 | GCU_1632 | GCU_348977 | GC_Urine |
| 1633 | GCU_1633 | GCU_348903 | GC_Urine |
| 1634 | GCU_1634 | GCU_348900 | GC_Urine |
| 1635 | GCU_1635 | GCU_339455 | GC_Urine |
| 1636 | GCU_1636 | GCU_339205 | GC_Urine |
| 1637 | GCU_1637 | GCU_338896 | GC_Urine |
| 1638 | GCU_1638 | GCU_338773 | GC_Urine |
| 1639 | GCU_1639 | GCU_338711 | GC_Urine |
| 1640 | GCU_1640 | GCU_338465 | GC_Urine |
| 1641 | GCU_1641 | GCU_337230 | GC_Urine |
| 1642 | GCU_1642 | GCU_337159 | GC_Urine |
| 1643 | GCU_1643 | GCU_337157 | GC_Urine |
| 1644 | GCU_1644 | GCU_335989 | GC_Urine |
| 1645 | GCU_1645 | GCU_330609 | GC_Urine |
| 1646 | GCU_1646 | GCU_328803 | GC_Urine |
| 1647 | GCU_1647 | GCU_328506 | GC_Urine |
| 1648 | GCU_1648 | GCU_327665 | GC_Urine |
| 1649 | GCU_1649 | GCU_326566 | GC_Urine |
| 1650 | GCU_1650 | GCU_326500 | GC_Urine |
| 1651 | GCU_1651 | GCU_324627 | GC_Urine |
| 1652 | GCU_1652 | GCU_323640 | GC_Urine |
| 1653 | GCU_1653 | GCU_322260 | GC_Urine |
| 1654 | GCU_1654 | GCU_322204 | GC_Urine |
| 1655 | GCU_1655 | GCU_322199 | GC_Urine |
| 1656 | GCU_1656 | GCU_321896 | GC_Urine |
| 1657 | GCU_1657 | GCU_321748 | GC_Urine |
| 1658 | GCU_1658 | GCU_321716 | GC_Urine |
| 1659 | GCU_1659 | GCU_321703 | GC_Urine |
| 1660 | GCU_1660 | GCU_321696 | GC_Urine |
| 1661 | GCU_1661 | GCU_321693 | GC_Urine |
| 1662 | GCU_1662 | GCU_321685 | GC_Urine |
| 1663 | GCU_1663 | GCU_321533 | GC_Urine |
| 1664 | GCU_1664 | GCU_320562 | GC_Urine |
| 1665 | GCU_1665 | GCU_320489 | GC_Urine |
| 1666 | GCU_1666 | GCU_320207 | GC_Urine |
| 1667 | GCU_1667 | GCU_320146 | GC_Urine |
| 1668 | GCU_1668 | GCU_319935 | GC_Urine |
| 1669 | GCU_1669 | GCU_319923 | GC_Urine |
| 1670 | GCU_1670 | GCU_319536 | GC_Urine |
| 1671 | GCU_1671 | GCU_319370 | GC_Urine |
| 1672 | GCU_1672 | GCU_318794 | GC_Urine |
| 1673 | GCU_1673 | GCU_318770 | GC_Urine |
| 1674 | GCU_1674 | GCU_318412 | GC_Urine |
| 1675 | GCU_1675 | GCU_312592 | GC_Urine |
| 1676 | GCU_1676 | GCU_312139 | GC_Urine |
| 1677 | GCU_1677 | GCU_311085 | GC_Urine |
| 1678 | GCU_1678 | GCU_311071 | GC_Urine |
| 1679 | GCU_1679 | GCU_311066 | GC_Urine |
| 1680 | GCU_1680 | GCU_311029 | GC_Urine |
| 1681 | GCU_1681 | GCU_310988 | GC_Urine |
| 1682 | GCU_1682 | GCU_310904 | GC_Urine |
| 1683 | GCU_1683 | GCU_310785 | GC_Urine |

|      |          |            |          |
|------|----------|------------|----------|
| 1684 | GCU_1684 | GCU_310752 | GC_Urine |
| 1685 | GCU_1685 | GCU_310634 | GC_Urine |
| 1686 | GCU_1686 | GCU_310592 | GC_Urine |
| 1687 | GCU_1687 | GCU_310461 | GC_Urine |
| 1688 | GCU_1688 | GCU_310408 | GC_Urine |
| 1689 | GCU_1689 | GCU_310380 | GC_Urine |
| 1690 | GCU_1690 | GCU_310240 | GC_Urine |
| 1691 | GCU_1691 | GCU_310063 | GC_Urine |
| 1692 | GCU_1692 | GCU_310046 | GC_Urine |
| 1693 | GCU_1693 | GCU_310006 | GC_Urine |
| 1694 | GCU_1694 | GCU_309837 | GC_Urine |
| 1695 | GCU_1695 | GCU_309830 | GC_Urine |
| 1696 | GCU_1696 | GCU_309829 | GC_Urine |
| 1697 | GCU_1697 | GCU_309725 | GC_Urine |
| 1698 | GCU_1698 | GCU_309642 | GC_Urine |
| 1699 | GCU_1699 | GCU_309631 | GC_Urine |
| 1700 | GCU_1700 | GCU_309626 | GC_Urine |
| 1701 | GCU_1701 | GCU_309591 | GC_Urine |
| 1702 | GCU_1702 | GCU_309584 | GC_Urine |
| 1703 | GCU_1703 | GCU_308547 | GC_Urine |
| 1704 | GCU_1704 | GCU_308452 | GC_Urine |
| 1705 | GCU_1705 | GCU_308387 | GC_Urine |
| 1706 | GCU_1706 | GCU_308370 | GC_Urine |
| 1707 | GCU_1707 | GCU_308350 | GC_Urine |
| 1708 | GCU_1708 | GCU_308328 | GC_Urine |
| 1709 | GCU_1709 | GCU_308308 | GC_Urine |
| 1710 | GCU_1710 | GCU_308270 | GC_Urine |
| 1711 | GCU_1711 | GCU_308244 | GC_Urine |
| 1712 | GCU_1712 | GCU_308227 | GC_Urine |
| 1713 | GCU_1713 | GCU_308220 | GC_Urine |
| 1714 | GCU_1714 | GCU_308210 | GC_Urine |
| 1715 | GCU_1715 | GCU_308192 | GC_Urine |
| 1716 | GCU_1716 | GCU_308188 | GC_Urine |
| 1717 | GCU_1717 | GCU_308158 | GC_Urine |
| 1718 | GCU_1718 | GCU_308106 | GC_Urine |
| 1719 | GCU_1719 | GCU_307915 | GC_Urine |
| 1720 | GCU_1720 | GCU_306148 | GC_Urine |
| 1721 | GCU_1721 | GCU_306145 | GC_Urine |
| 1722 | GCU_1722 | GCU_305306 | GC_Urine |
| 1723 | GCU_1723 | GCU_305055 | GC_Urine |
| 1724 | GCU_1724 | GCU_304945 | GC_Urine |
| 1725 | GCU_1725 | GCU_304847 | GC_Urine |
| 1726 | GCU_1726 | GCU_304770 | GC_Urine |
| 1727 | GCU_1727 | GCU_303163 | GC_Urine |
| 1728 | GCU_1728 | GCU_303152 | GC_Urine |
| 1729 | GCU_1729 | GCU_303091 | GC_Urine |
| 1730 | GCU_1730 | GCU_303066 | GC_Urine |
| 1731 | GCU_1731 | GCU_303060 | GC_Urine |
| 1732 | GCU_1732 | GCU_302341 | GC_Urine |
| 1733 | GCU_1733 | GCU_302328 | GC_Urine |
| 1734 | GCU_1734 | GCU_302325 | GC_Urine |
| 1735 | GCU_1735 | GCU_301755 | GC_Urine |
| 1736 | GCU_1736 | GCU_301583 | GC_Urine |
| 1737 | GCU_1737 | GCU_301570 | GC_Urine |
| 1738 | GCU_1738 | GCU_301565 | GC_Urine |
| 1739 | GCU_1739 | GCU_301536 | GC_Urine |
| 1740 | GCU_1740 | GCU_300919 | GC_Urine |
| 1741 | GCU_1741 | GCU_300866 | GC_Urine |
| 1742 | GCU_1742 | GCU_300663 | GC_Urine |
| 1743 | GCU_1743 | GCU_300661 | GC_Urine |
| 1744 | GCU_1744 | GCU_300626 | GC_Urine |
| 1745 | GCU_1745 | GCU_300481 | GC_Urine |

|      |          |            |          |
|------|----------|------------|----------|
| 1746 | GCU_1746 | GCU_300379 | GC_Urine |
| 1747 | GCU_1747 | GCU_300353 | GC_Urine |
| 1748 | GCU_1748 | GCU_300348 | GC_Urine |
| 1749 | GCU_1749 | GCU_299859 | GC_Urine |
| 1750 | GCU_1750 | GCU_296113 | GC_Urine |
| 1751 | GCU_1751 | GCU_296081 | GC_Urine |
| 1752 | GCU_1752 | GCU_295269 | GC_Urine |
| 1753 | GCU_1753 | GCU_295226 | GC_Urine |
| 1754 | GCU_1754 | GCU_295150 | GC_Urine |
| 1755 | GCU_1755 | GCU_294988 | GC_Urine |
| 1756 | GCU_1756 | GCU_294826 | GC_Urine |
| 1757 | GCU_1757 | GCU_294799 | GC_Urine |
| 1758 | GCU_1758 | GCU_294795 | GC_Urine |
| 1759 | GCU_1759 | GCU_294621 | GC_Urine |
| 1760 | GCU_1760 | GCU_294547 | GC_Urine |
| 1761 | GCU_1761 | GCU_294511 | GC_Urine |
| 1762 | GCU_1762 | GCU_294462 | GC_Urine |
| 1763 | GCU_1763 | GCU_294456 | GC_Urine |
| 1764 | GCU_1764 | GCU_294129 | GC_Urine |
| 1765 | GCU_1765 | GCU_293873 | GC_Urine |
| 1766 | GCU_1766 | GCU_293824 | GC_Urine |
| 1767 | GCU_1767 | GCU_293814 | GC_Urine |
| 1768 | GCU_1768 | GCU_293688 | GC_Urine |
| 1769 | GCU_1769 | GCU_293097 | GC_Urine |
| 1770 | GCU_1770 | GCU_289827 | GC_Urine |
| 1771 | GCU_1771 | GCU_289055 | GC_Urine |
| 1772 | GCU_1772 | GCU_288966 | GC_Urine |
| 1773 | GCU_1773 | GCU_288892 | GC_Urine |
| 1774 | GCU_1774 | GCU_288846 | GC_Urine |
| 1775 | GCU_1775 | GCU_288375 | GC_Urine |
| 1776 | GCU_1776 | GCU_288351 | GC_Urine |
| 1777 | GCU_1777 | GCU_288331 | GC_Urine |
| 1778 | GCU_1778 | GCU_286873 | GC_Urine |
| 1779 | GCU_1779 | GCU_286263 | GC_Urine |
| 1780 | GCU_1780 | GCU_285189 | GC_Urine |
| 1781 | GCU_1781 | GCU_285065 | GC_Urine |
| 1782 | GCU_1782 | GCU_284611 | GC_Urine |
| 1783 | GCU_1783 | GCU_281398 | GC_Urine |
| 1784 | GCU_1784 | GCU_281386 | GC_Urine |
| 1785 | GCU_1785 | GCU_280705 | GC_Urine |
| 1786 | GCU_1786 | GCU_280553 | GC_Urine |
| 1787 | GCU_1787 | GCU_280546 | GC_Urine |
| 1788 | GCU_1788 | GCU_278207 | GC_Urine |
| 1789 | GCU_1789 | GCU_277432 | GC_Urine |
| 1790 | GCU_1790 | GCU_275375 | GC_Urine |
| 1791 | GCU_1791 | GCU_274454 | GC_Urine |
| 1792 | GCU_1792 | GCU_273925 | GC_Urine |
| 1793 | GCU_1793 | GCU_272849 | GC_Urine |
| 1794 | GCU_1794 | GCU_271143 | GC_Urine |
| 1795 | GCU_1795 | GCU_271063 | GC_Urine |
| 1796 | GCU_1796 | GCU_271008 | GC_Urine |
| 1797 | GCU_1797 | GCU_270547 | GC_Urine |
| 1798 | GCU_1798 | GCU_270251 | GC_Urine |
| 1799 | GCU_1799 | GCU_270080 | GC_Urine |
| 1800 | GCU_1800 | GCU_269870 | GC_Urine |
| 1801 | GCU_1801 | GCU_269852 | GC_Urine |
| 1802 | GCU_1802 | GCU_269776 | GC_Urine |
| 1803 | GCU_1803 | GCU_269689 | GC_Urine |
| 1804 | GCU_1804 | GCU_269648 | GC_Urine |
| 1805 | GCU_1805 | GCU_269625 | GC_Urine |
| 1806 | GCU_1806 | GCU_269261 | GC_Urine |
| 1807 | GCU_1807 | GCU_269146 | GC_Urine |

|      |          |            |          |
|------|----------|------------|----------|
| 1808 | GCU_1808 | GCU_268716 | GC_Urine |
| 1809 | GCU_1809 | GCU_268610 | GC_Urine |
| 1810 | GCU_1810 | GCU_268506 | GC_Urine |
| 1811 | GCU_1811 | GCU_268437 | GC_Urine |
| 1812 | GCU_1812 | GCU_268365 | GC_Urine |
| 1813 | GCU_1813 | GCU_268326 | GC_Urine |
| 1814 | GCU_1814 | GCU_268316 | GC_Urine |
| 1815 | GCU_1815 | GCU_268313 | GC_Urine |
| 1816 | GCU_1816 | GCU_268167 | GC_Urine |
| 1817 | GCU_1817 | GCU_268165 | GC_Urine |
| 1818 | GCU_1818 | GCU_268148 | GC_Urine |
| 1819 | GCU_1819 | GCU_268141 | GC_Urine |
| 1820 | GCU_1820 | GCU_268110 | GC_Urine |
| 1821 | GCU_1821 | GCU_268106 | GC_Urine |
| 1822 | GCU_1822 | GCU_268103 | GC_Urine |
| 1823 | GCU_1823 | GCU_268100 | GC_Urine |
| 1824 | GCU_1824 | GCU_268093 | GC_Urine |
| 1825 | GCU_1825 | GCU_268083 | GC_Urine |
| 1826 | GCU_1826 | GCU_268050 | GC_Urine |
| 1827 | GCU_1827 | GCU_268042 | GC_Urine |
| 1828 | GCU_1828 | GCU_268026 | GC_Urine |
| 1829 | GCU_1829 | GCU_268025 | GC_Urine |
| 1830 | GCU_1830 | GCU_268024 | GC_Urine |
| 1831 | GCU_1831 | GCU_268007 | GC_Urine |
| 1832 | GCU_1832 | GCU_268006 | GC_Urine |
| 1833 | GCU_1833 | GCU_268005 | GC_Urine |
| 1834 | GCU_1834 | GCU_267987 | GC_Urine |
| 1835 | GCU_1835 | GCU_267972 | GC_Urine |
| 1836 | GCU_1836 | GCU_267958 | GC_Urine |
| 1837 | GCU_1837 | GCU_267946 | GC_Urine |
| 1838 | GCU_1838 | GCU_267926 | GC_Urine |
| 1839 | GCU_1839 | GCU_267923 | GC_Urine |
| 1840 | GCU_1840 | GCU_267904 | GC_Urine |
| 1841 | GCU_1841 | GCU_267898 | GC_Urine |
| 1842 | GCU_1842 | GCU_267893 | GC_Urine |
| 1843 | GCU_1843 | GCU_267890 | GC_Urine |
| 1844 | GCU_1844 | GCU_267886 | GC_Urine |
| 1845 | GCU_1845 | GCU_267884 | GC_Urine |
| 1846 | GCU_1846 | GCU_267882 | GC_Urine |
| 1847 | GCU_1847 | GCU_267880 | GC_Urine |
| 1848 | GCU_1848 | GCU_267872 | GC_Urine |
| 1849 | GCU_1849 | GCU_267871 | GC_Urine |
| 1850 | GCU_1850 | GCU_267870 | GC_Urine |
| 1851 | GCU_1851 | GCU_267868 | GC_Urine |
| 1852 | GCU_1852 | GCU_267851 | GC_Urine |
| 1853 | GCU_1853 | GCU_267850 | GC_Urine |
| 1854 | GCU_1854 | GCU_267842 | GC_Urine |
| 1855 | GCU_1855 | GCU_267833 | GC_Urine |
| 1856 | GCU_1856 | GCU_267830 | GC_Urine |
| 1857 | GCU_1857 | GCU_267824 | GC_Urine |
| 1858 | GCU_1858 | GCU_267816 | GC_Urine |
| 1859 | GCU_1859 | GCU_267808 | GC_Urine |
| 1860 | GCU_1860 | GCU_267787 | GC_Urine |
| 1861 | GCU_1861 | GCU_267785 | GC_Urine |
| 1862 | GCU_1862 | GCU_267774 | GC_Urine |
| 1863 | GCU_1863 | GCU_267771 | GC_Urine |
| 1864 | GCU_1864 | GCU_267769 | GC_Urine |
| 1865 | GCU_1865 | GCU_267768 | GC_Urine |
| 1866 | GCU_1866 | GCU_267762 | GC_Urine |
| 1867 | GCU_1867 | GCU_267760 | GC_Urine |
| 1868 | GCU_1868 | GCU_267757 | GC_Urine |
| 1869 | GCU_1869 | GCU_267756 | GC_Urine |

|      |          |            |          |
|------|----------|------------|----------|
| 1870 | GCU_1870 | GCU_267755 | GC_Urine |
| 1871 | GCU_1871 | GCU_267751 | GC_Urine |
| 1872 | GCU_1872 | GCU_267749 | GC_Urine |
| 1873 | GCU_1873 | GCU_267748 | GC_Urine |
| 1874 | GCU_1874 | GCU_267742 | GC_Urine |
| 1875 | GCU_1875 | GCU_267740 | GC_Urine |
| 1876 | GCU_1876 | GCU_267737 | GC_Urine |
| 1877 | GCU_1877 | GCU_267730 | GC_Urine |
| 1878 | GCU_1878 | GCU_267727 | GC_Urine |
| 1879 | GCU_1879 | GCU_267723 | GC_Urine |
| 1880 | GCU_1880 | GCU_267721 | GC_Urine |
| 1881 | GCU_1881 | GCU_267715 | GC_Urine |
| 1882 | GCU_1882 | GCU_267714 | GC_Urine |
| 1883 | GCU_1883 | GCU_267707 | GC_Urine |
| 1884 | GCU_1884 | GCU_267704 | GC_Urine |
| 1885 | GCU_1885 | GCU_267703 | GC_Urine |
| 1886 | GCU_1886 | GCU_267701 | GC_Urine |
| 1887 | GCU_1887 | GCU_267698 | GC_Urine |
| 1888 | GCU_1888 | GCU_267696 | GC_Urine |
| 1889 | GCU_1889 | GCU_267695 | GC_Urine |
| 1890 | GCU_1890 | GCU_267692 | GC_Urine |
| 1891 | GCU_1891 | GCU_267691 | GC_Urine |
| 1892 | GCU_1892 | GCU_267687 | GC_Urine |
| 1893 | GCU_1893 | GCU_267686 | GC_Urine |
| 1894 | GCU_1894 | GCU_267682 | GC_Urine |
| 1895 | GCU_1895 | GCU_267676 | GC_Urine |
| 1896 | GCU_1896 | GCU_267675 | GC_Urine |
| 1897 | GCU_1897 | GCU_267674 | GC_Urine |
| 1898 | GCU_1898 | GCU_267673 | GC_Urine |
| 1899 | GCU_1899 | GCU_267671 | GC_Urine |
| 1900 | GCU_1900 | GCU_267670 | GC_Urine |
| 1901 | GCU_1901 | GCU_267669 | GC_Urine |
| 1902 | GCU_1902 | GCU_267665 | GC_Urine |
| 1903 | GCU_1903 | GCU_267661 | GC_Urine |
| 1904 | GCU_1904 | GCU_267656 | GC_Urine |
| 1905 | GCU_1905 | GCU_267653 | GC_Urine |
| 1906 | GCU_1906 | GCU_267652 | GC_Urine |
| 1907 | GCU_1907 | GCU_267649 | GC_Urine |
| 1908 | GCU_1908 | GCU_267647 | GC_Urine |
| 1909 | GCU_1909 | GCU_267645 | GC_Urine |
| 1910 | GCU_1910 | GCU_245734 | GC_Urine |
| 1911 | GCU_1911 | GCU_245705 | GC_Urine |
| 1912 | GCU_1912 | GCU_244467 | GC_Urine |
| 1913 | GCU_1913 | GCU_242565 | GC_Urine |
| 1914 | GCU_1914 | GCU_242526 | GC_Urine |
| 1915 | GCU_1915 | GCU_242419 | GC_Urine |
| 1916 | GCU_1916 | GCU_241911 | GC_Urine |
| 1917 | GCU_1917 | GCU_241882 | GC_Urine |
| 1918 | GCU_1918 | GCU_241387 | GC_Urine |
| 1919 | GCU_1919 | GCU_241319 | GC_Urine |
| 1920 | GCU_1920 | GCU_241312 | GC_Urine |
| 1921 | GCU_1921 | GCU_241307 | GC_Urine |
| 1922 | GCU_1922 | GCU_241277 | GC_Urine |
| 1923 | GCU_1923 | GCU_241218 | GC_Urine |
| 1924 | GCU_1924 | GCU_241189 | GC_Urine |
| 1925 | GCU_1925 | GCU_241141 | GC_Urine |
| 1926 | GCU_1926 | GCU_241097 | GC_Urine |
| 1927 | GCU_1927 | GCU_241095 | GC_Urine |
| 1928 | GCU_1928 | GCU_241054 | GC_Urine |
| 1929 | GCU_1929 | GCU_241039 | GC_Urine |
| 1930 | GCU_1930 | GCU_241032 | GC_Urine |
| 1931 | GCU_1931 | GCU_240984 | GC_Urine |

|      |          |                          |          |
|------|----------|--------------------------|----------|
| 1932 | GCU_1932 | GCU_240583               | GC_Urine |
| 1933 | GCU_1933 | GCU_240374               | GC_Urine |
| 1934 | GCU_1934 | GCU_240346               | GC_Urine |
| 1935 | GCU_1935 | GCU_239565               | GC_Urine |
| 1936 | GCU_1936 | GCU_239312               | GC_Urine |
| 1937 | GCU_1937 | GCU_238571               | GC_Urine |
| 1938 | GCU_1938 | GCU_238291               | GC_Urine |
| 1939 | GCU_1939 | GCU_238267 trisaccharide | GC_Urine |
| 1940 | GCU_1940 | GCU_238165               | GC_Urine |
| 1941 | GCU_1941 | GCU_237946               | GC_Urine |
| 1942 | GCU_1942 | GCU_237937               | GC_Urine |
| 1943 | GCU_1943 | GCU_237912               | GC_Urine |
| 1944 | GCU_1944 | GCU_237892               | GC_Urine |
| 1945 | GCU_1945 | GCU_237772               | GC_Urine |
| 1946 | GCU_1946 | GCU_237520               | GC_Urine |
| 1947 | GCU_1947 | GCU_237488               | GC_Urine |
| 1948 | GCU_1948 | GCU_237358               | GC_Urine |
| 1949 | GCU_1949 | GCU_237281               | GC_Urine |
| 1950 | GCU_1950 | GCU_237267               | GC_Urine |
| 1951 | GCU_1951 | GCU_236889               | GC_Urine |
| 1952 | GCU_1952 | GCU_236870               | GC_Urine |
| 1953 | GCU_1953 | GCU_236810               | GC_Urine |
| 1954 | GCU_1954 | GCU_236725               | GC_Urine |
| 1955 | GCU_1955 | GCU_236724               | GC_Urine |
| 1956 | GCU_1956 | GCU_235770               | GC_Urine |
| 1957 | GCU_1957 | GCU_235755               | GC_Urine |
| 1958 | GCU_1958 | GCU_234636               | GC_Urine |
| 1959 | GCU_1959 | GCU_234618               | GC_Urine |
| 1960 | GCU_1960 | GCU_234486               | GC_Urine |
| 1961 | GCU_1961 | GCU_234432               | GC_Urine |
| 1962 | GCU_1962 | GCU_233803               | GC_Urine |
| 1963 | GCU_1963 | GCU_233455               | GC_Urine |
| 1964 | GCU_1964 | GCU_233443               | GC_Urine |
| 1965 | GCU_1965 | GCU_233429               | GC_Urine |
| 1966 | GCU_1966 | GCU_233331               | GC_Urine |
| 1967 | GCU_1967 | GCU_233289               | GC_Urine |
| 1968 | GCU_1968 | GCU_233275               | GC_Urine |
| 1969 | GCU_1969 | GCU_233017               | GC_Urine |
| 1970 | GCU_1970 | GCU_232946               | GC_Urine |
| 1971 | GCU_1971 | GCU_232869               | GC_Urine |
| 1972 | GCU_1972 | GCU_232774               | GC_Urine |
| 1973 | GCU_1973 | GCU_232752               | GC_Urine |
| 1974 | GCU_1974 | GCU_232739               | GC_Urine |
| 1975 | GCU_1975 | GCU_232707               | GC_Urine |
| 1976 | GCU_1976 | GCU_232660               | GC_Urine |
| 1977 | GCU_1977 | GCU_232659               | GC_Urine |
| 1978 | GCU_1978 | GCU_232658               | GC_Urine |
| 1979 | GCU_1979 | GCU_232610               | GC_Urine |
| 1980 | GCU_1980 | GCU_232586               | GC_Urine |
| 1981 | GCU_1981 | GCU_232506               | GC_Urine |
| 1982 | GCU_1982 | GCU_232366               | GC_Urine |
| 1983 | GCU_1983 | GCU_232185               | GC_Urine |
| 1984 | GCU_1984 | GCU_232102               | GC_Urine |
| 1985 | GCU_1985 | GCU_232075               | GC_Urine |
| 1986 | GCU_1986 | GCU_231947               | GC_Urine |
| 1987 | GCU_1987 | GCU_231945               | GC_Urine |
| 1988 | GCU_1988 | GCU_231941               | GC_Urine |
| 1989 | GCU_1989 | GCU_231935               | GC_Urine |
| 1990 | GCU_1990 | GCU_231879               | GC_Urine |
| 1991 | GCU_1991 | GCU_231813               | GC_Urine |
| 1992 | GCU_1992 | GCU_231805               | GC_Urine |
| 1993 | GCU_1993 | GCU_231801               | GC_Urine |



|      |          |            |          |
|------|----------|------------|----------|
| 1994 | GCU_1994 | GCU_231796 | GC_Urine |
| 1995 | GCU_1995 | GCU_231708 | GC_Urine |
| 1996 | GCU_1996 | GCU_231685 | GC_Urine |
| 1997 | GCU_1997 | GCU_231680 | GC_Urine |
| 1998 | GCU_1998 | GCU_231678 | GC_Urine |
| 1999 | GCU_1999 | GCU_231657 | GC_Urine |
| 2000 | GCU_2000 | GCU_231544 | GC_Urine |
| 2001 | GCU_2001 | GCU_231511 | GC_Urine |
| 2002 | GCU_2002 | GCU_231248 | GC_Urine |
| 2003 | GCU_2003 | GCU_231210 | GC_Urine |
| 2004 | GCU_2004 | GCU_231123 | GC_Urine |
| 2005 | GCU_2005 | GCU_231070 | GC_Urine |
| 2006 | GCU_2006 | GCU_229947 | GC_Urine |
| 2007 | GCU_2007 | GCU_229199 | GC_Urine |
| 2008 | GCU_2008 | GCU_229010 | GC_Urine |
| 2009 | GCU_2009 | GCU_228918 | GC_Urine |
| 2010 | GCU_2010 | GCU_228913 | GC_Urine |
| 2011 | GCU_2011 | GCU_228911 | GC_Urine |
| 2012 | GCU_2012 | GCU_228904 | GC_Urine |
| 2013 | GCU_2013 | GCU_228630 | GC_Urine |
| 2014 | GCU_2014 | GCU_228613 | GC_Urine |
| 2015 | GCU_2015 | GCU_228546 | GC_Urine |
| 2016 | GCU_2016 | GCU_228405 | GC_Urine |
| 2017 | GCU_2017 | GCU_228394 | GC_Urine |
| 2018 | GCU_2018 | GCU_228262 | GC_Urine |
| 2019 | GCU_2019 | GCU_228249 | GC_Urine |
| 2020 | GCU_2020 | GCU_228202 | GC_Urine |
| 2021 | GCU_2021 | GCU_228075 | GC_Urine |
| 2022 | GCU_2022 | GCU_228070 | GC_Urine |
| 2023 | GCU_2023 | GCU_228039 | GC_Urine |
| 2024 | GCU_2024 | GCU_228008 | GC_Urine |
| 2025 | GCU_2025 | GCU_228004 | GC_Urine |
| 2026 | GCU_2026 | GCU_227902 | GC_Urine |
| 2027 | GCU_2027 | GCU_227774 | GC_Urine |
| 2028 | GCU_2028 | GCU_227769 | GC_Urine |
| 2029 | GCU_2029 | GCU_227716 | GC_Urine |
| 2030 | GCU_2030 | GCU_227710 | GC_Urine |
| 2031 | GCU_2031 | GCU_227677 | GC_Urine |
| 2032 | GCU_2032 | GCU_227656 | GC_Urine |
| 2033 | GCU_2033 | GCU_227632 | GC_Urine |
| 2034 | GCU_2034 | GCU_227626 | GC_Urine |
| 2035 | GCU_2035 | GCU_227604 | GC_Urine |
| 2036 | GCU_2036 | GCU_227601 | GC_Urine |
| 2037 | GCU_2037 | GCU_227592 | GC_Urine |
| 2038 | GCU_2038 | GCU_227588 | GC_Urine |
| 2039 | GCU_2039 | GCU_227367 | GC_Urine |
| 2040 | GCU_2040 | GCU_227360 | GC_Urine |
| 2041 | GCU_2041 | GCU_226303 | GC_Urine |
| 2042 | GCU_2042 | GCU_225891 | GC_Urine |
| 2043 | GCU_2043 | GCU_225890 | GC_Urine |
| 2044 | GCU_2044 | GCU_225882 | GC_Urine |
| 2045 | GCU_2045 | GCU_225867 | GC_Urine |
| 2046 | GCU_2046 | GCU_225863 | GC_Urine |
| 2047 | GCU_2047 | GCU_225854 | GC_Urine |
| 2048 | GCU_2048 | GCU_225494 | GC_Urine |
| 2049 | GCU_2049 | GCU_225481 | GC_Urine |
| 2050 | GCU_2050 | GCU_225417 | GC_Urine |
| 2051 | GCU_2051 | GCU_225262 | GC_Urine |
| 2052 | GCU_2052 | GCU_225043 | GC_Urine |
| 2053 | GCU_2053 | GCU_224901 | GC_Urine |
| 2054 | GCU_2054 | GCU_224843 | GC_Urine |
| 2055 | GCU_2055 | GCU_224799 | GC_Urine |

|      |          |            |          |
|------|----------|------------|----------|
| 2056 | GCU_2056 | GCU_224633 | GC_Urine |
| 2057 | GCU_2057 | GCU_224533 | GC_Urine |
| 2058 | GCU_2058 | GCU_224322 | GC_Urine |
| 2059 | GCU_2059 | GCU_223865 | GC_Urine |
| 2060 | GCU_2060 | GCU_223854 | GC_Urine |
| 2061 | GCU_2061 | GCU_223625 | GC_Urine |
| 2062 | GCU_2062 | GCU_223618 | GC_Urine |
| 2063 | GCU_2063 | GCU_223535 | GC_Urine |
| 2064 | GCU_2064 | GCU_222169 | GC_Urine |
| 2065 | GCU_2065 | GCU_222115 | GC_Urine |
| 2066 | GCU_2066 | GCU_222050 | GC_Urine |
| 2067 | GCU_2067 | GCU_221701 | GC_Urine |
| 2068 | GCU_2068 | GCU_221594 | GC_Urine |
| 2069 | GCU_2069 | GCU_221571 | GC_Urine |
| 2070 | GCU_2070 | GCU_221568 | GC_Urine |
| 2071 | GCU_2071 | GCU_221505 | GC_Urine |
| 2072 | GCU_2072 | GCU_220384 | GC_Urine |
| 2073 | GCU_2073 | GCU_220136 | GC_Urine |
| 2074 | GCU_2074 | GCU_220122 | GC_Urine |
| 2075 | GCU_2075 | GCU_220007 | GC_Urine |
| 2076 | GCU_2076 | GCU_219510 | GC_Urine |
| 2077 | GCU_2077 | GCU_219486 | GC_Urine |
| 2078 | GCU_2078 | GCU_218821 | GC_Urine |
| 2079 | GCU_2079 | GCU_218816 | GC_Urine |
| 2080 | GCU_2080 | GCU_218767 | GC_Urine |
| 2081 | GCU_2081 | GCU_218765 | GC_Urine |
| 2082 | GCU_2082 | GCU_218724 | GC_Urine |
| 2083 | GCU_2083 | GCU_218708 | GC_Urine |
| 2084 | GCU_2084 | GCU_218699 | GC_Urine |
| 2085 | GCU_2085 | GCU_218694 | GC_Urine |
| 2086 | GCU_2086 | GCU_218574 | GC_Urine |
| 2087 | GCU_2087 | GCU_218520 | GC_Urine |
| 2088 | GCU_2088 | GCU_217893 | GC_Urine |
| 2089 | GCU_2089 | GCU_217816 | GC_Urine |
| 2090 | GCU_2090 | GCU_217783 | GC_Urine |
| 2091 | GCU_2091 | GCU_216870 | GC_Urine |
| 2092 | GCU_2092 | GCU_216844 | GC_Urine |
| 2093 | GCU_2093 | GCU_216838 | GC_Urine |
| 2094 | GCU_2094 | GCU_216427 | GC_Urine |
| 2095 | GCU_2095 | GCU_215559 | GC_Urine |
| 2096 | GCU_2096 | GCU_215532 | GC_Urine |
| 2097 | GCU_2097 | GCU_215520 | GC_Urine |
| 2098 | GCU_2098 | GCU_215494 | GC_Urine |
| 2099 | GCU_2099 | GCU_215397 | GC_Urine |
| 2100 | GCU_2100 | GCU_215345 | GC_Urine |
| 2101 | GCU_2101 | GCU_215066 | GC_Urine |
| 2102 | GCU_2102 | GCU_214685 | GC_Urine |
| 2103 | GCU_2103 | GCU_214405 | GC_Urine |
| 2104 | GCU_2104 | GCU_214313 | GC_Urine |
| 2105 | GCU_2105 | GCU_214287 | GC_Urine |
| 2106 | GCU_2106 | GCU_214175 | GC_Urine |
| 2107 | GCU_2107 | GCU_214172 | GC_Urine |
| 2108 | GCU_2108 | GCU_214166 | GC_Urine |
| 2109 | GCU_2109 | GCU_214158 | GC_Urine |
| 2110 | GCU_2110 | GCU_214011 | GC_Urine |
| 2111 | GCU_2111 | GCU_213972 | GC_Urine |
| 2112 | GCU_2112 | GCU_213735 | GC_Urine |
| 2113 | GCU_2113 | GCU_213353 | GC_Urine |
| 2114 | GCU_2114 | GCU_213296 | GC_Urine |
| 2115 | GCU_2115 | GCU_213253 | GC_Urine |
| 2116 | GCU_2116 | GCU_213155 | GC_Urine |
| 2117 | GCU_2117 | GCU_212781 | GC_Urine |

|      |          |            |          |
|------|----------|------------|----------|
| 2118 | GCU_2118 | GCU_212748 | GC_Urine |
| 2119 | GCU_2119 | GCU_212734 | GC_Urine |
| 2120 | GCU_2120 | GCU_212586 | GC_Urine |
| 2121 | GCU_2121 | GCU_212209 | GC_Urine |
| 2122 | GCU_2122 | GCU_211991 | GC_Urine |
| 2123 | GCU_2123 | GCU_211916 | GC_Urine |
| 2124 | GCU_2124 | GCU_211902 | GC_Urine |
| 2125 | GCU_2125 | GCU_211896 | GC_Urine |
| 2126 | GCU_2126 | GCU_211891 | GC_Urine |
| 2127 | GCU_2127 | GCU_211736 | GC_Urine |
| 2128 | GCU_2128 | GCU_211378 | GC_Urine |
| 2129 | GCU_2129 | GCU_210286 | GC_Urine |
| 2130 | GCU_2130 | GCU_208770 | GC_Urine |
| 2131 | GCU_2131 | GCU_208723 | GC_Urine |
| 2132 | GCU_2132 | GCU_208712 | GC_Urine |
| 2133 | GCU_2133 | GCU_208688 | GC_Urine |
| 2134 | GCU_2134 | GCU_208655 | GC_Urine |
| 2135 | GCU_2135 | GCU_208647 | GC_Urine |
| 2136 | GCU_2136 | GCU_208397 | GC_Urine |
| 2137 | GCU_2137 | GCU_208394 | GC_Urine |
| 2138 | GCU_2138 | GCU_207598 | GC_Urine |
| 2139 | GCU_2139 | GCU_207223 | GC_Urine |
| 2140 | GCU_2140 | GCU_206526 | GC_Urine |
| 2141 | GCU_2141 | GCU_206309 | GC_Urine |
| 2142 | GCU_2142 | GCU_206289 | GC_Urine |
| 2143 | GCU_2143 | GCU_205849 | GC_Urine |
| 2144 | GCU_2144 | GCU_205680 | GC_Urine |
| 2145 | GCU_2145 | GCU_205679 | GC_Urine |
| 2146 | GCU_2146 | GCU_205675 | GC_Urine |
| 2147 | GCU_2147 | GCU_205670 | GC_Urine |
| 2148 | GCU_2148 | GCU_205669 | GC_Urine |
| 2149 | GCU_2149 | GCU_204994 | GC_Urine |
| 2150 | GCU_2150 | GCU_204426 | GC_Urine |
| 2151 | GCU_2151 | GCU_204425 | GC_Urine |
| 2152 | GCU_2152 | GCU_204375 | GC_Urine |
| 2153 | GCU_2153 | GCU_204344 | GC_Urine |
| 2154 | GCU_2154 | GCU_204283 | GC_Urine |
| 2155 | GCU_2155 | GCU_204217 | GC_Urine |
| 2156 | GCU_2156 | GCU_203786 | GC_Urine |
| 2157 | GCU_2157 | GCU_203765 | GC_Urine |
| 2158 | GCU_2158 | GCU_203592 | GC_Urine |
| 2159 | GCU_2159 | GCU_203235 | GC_Urine |
| 2160 | GCU_2160 | GCU_202911 | GC_Urine |
| 2161 | GCU_2161 | GCU_202899 | GC_Urine |
| 2162 | GCU_2162 | GCU_202857 | GC_Urine |
| 2163 | GCU_2163 | GCU_202832 | GC_Urine |
| 2164 | GCU_2164 | GCU_202737 | GC_Urine |
| 2165 | GCU_2165 | GCU_202681 | GC_Urine |
| 2166 | GCU_2166 | GCU_202571 | GC_Urine |
| 2167 | GCU_2167 | GCU_202361 | GC_Urine |
| 2168 | GCU_2168 | GCU_202250 | GC_Urine |
| 2169 | GCU_2169 | GCU_202196 | GC_Urine |
| 2170 | GCU_2170 | GCU_202091 | GC_Urine |
| 2171 | GCU_2171 | GCU_202081 | GC_Urine |
| 2172 | GCU_2172 | GCU_202056 | GC_Urine |
| 2173 | GCU_2173 | GCU_201984 | GC_Urine |
| 2174 | GCU_2174 | GCU_201902 | GC_Urine |
| 2175 | GCU_2175 | GCU_201887 | GC_Urine |
| 2176 | GCU_2176 | GCU_201870 | GC_Urine |
| 2177 | GCU_2177 | GCU_201862 | GC_Urine |
| 2178 | GCU_2178 | GCU_201042 | GC_Urine |
| 2179 | GCU_2179 | GCU_200909 | GC_Urine |

|      |          |                                                 |          |
|------|----------|-------------------------------------------------|----------|
| 2180 | GCU_2180 | GCU_200905                                      | GC_Urine |
| 2181 | GCU_2181 | GCU_200712                                      | GC_Urine |
| 2182 | GCU_2182 | GCU_200687                                      | GC_Urine |
| 2183 | GCU_2183 | GCU_200675                                      | GC_Urine |
| 2184 | GCU_2184 | GCU_200670                                      | GC_Urine |
| 2185 | GCU_2185 | GCU_200629                                      | GC_Urine |
| 2186 | GCU_2186 | GCU_200597                                      | GC_Urine |
| 2187 | GCU_2187 | GCU_200589                                      | GC_Urine |
| 2188 | GCU_2188 | GCU_200588                                      | GC_Urine |
| 2189 | GCU_2189 | GCU_200541                                      | GC_Urine |
| 2190 | GCU_2190 | GCU_200540                                      | GC_Urine |
| 2191 | GCU_2191 | GCU_200506                                      | GC_Urine |
| 2192 | GCU_2192 | GCU_200490                                      | GC_Urine |
| 2193 | GCU_2193 | GCU_200478                                      | GC_Urine |
| 2194 | GCU_2194 | GCU_200472                                      | GC_Urine |
| 2195 | GCU_2195 | GCU_200469                                      | GC_Urine |
| 2196 | GCU_2196 | GCU_200468                                      | GC_Urine |
| 2197 | GCU_2197 | GCU_200421                                      | GC_Urine |
| 2198 | GCU_2198 | GCU_200392                                      | GC_Urine |
| 2199 | GCU_2199 | GCU_200391                                      | GC_Urine |
| 2200 | GCU_2200 | GCU_1-methyl-1,3-propanediyl)bis(oxy)-2TMS NIST | GC_Urine |
| 2201 | GCU_2201 | GCU_199596                                      | GC_Urine |
| 2202 | GCU_2202 | GCU_199562                                      | GC_Urine |
| 2203 | GCU_2203 | GCU_199553                                      | GC_Urine |
| 2204 | GCU_2204 | GCU_199463                                      | GC_Urine |
| 2205 | GCU_2205 | GCU_199433                                      | GC_Urine |
| 2206 | GCU_2206 | GCU_199338                                      | GC_Urine |
| 2207 | GCU_2207 | GCU_199337                                      | GC_Urine |
| 2208 | GCU_2208 | GCU_199317                                      | GC_Urine |
| 2209 | GCU_2209 | GCU_199229                                      | GC_Urine |
| 2210 | GCU_2210 | GCU_199177                                      | GC_Urine |
| 2211 | GCU_2211 | GCU_492765                                      | GC_Urine |
| 2212 | GCU_2212 | GCU_487513                                      | GC_Urine |
| 2213 | GCU_2213 | GCU_487272                                      | GC_Urine |
| 2214 | GCU_2214 | GCU_487269                                      | GC_Urine |
| 2215 | GCU_2215 | GCU_486245                                      | GC_Urine |
| 2216 | GCU_2216 | GCU_486213                                      | GC_Urine |
| 2217 | GCU_2217 | GCU_486211                                      | GC_Urine |
| 2218 | GCU_2218 | GCU_486054                                      | GC_Urine |
| 2219 | GCU_2219 | GCU_486020                                      | GC_Urine |
| 2220 | GCU_2220 | GCU_486017                                      | GC_Urine |
| 2221 | GCU_2221 | GCU_486007                                      | GC_Urine |
| 2222 | GCU_2222 | GCU_485553                                      | GC_Urine |
| 2223 | GCU_2223 | GCU_485481                                      | GC_Urine |
| 2224 | GCU_2224 | GCU_485464                                      | GC_Urine |
| 2225 | GCU_2225 | GCU_485443                                      | GC_Urine |
| 2226 | GCU_2226 | GCU_485397                                      | GC_Urine |
| 2227 | GCU_2227 | GCU_485388                                      | GC_Urine |
| 2228 | GCU_2228 | GCU_484792                                      | GC_Urine |
| 2229 | GCU_2229 | GCU_484719                                      | GC_Urine |
| 2230 | GCU_2230 | GCU_484689                                      | GC_Urine |
| 2231 | GCU_2231 | GCU_484573                                      | GC_Urine |
| 2232 | GCU_2232 | GCU_484345                                      | GC_Urine |
| 2233 | GCU_2233 | GCU_484307                                      | GC_Urine |
| 2234 | GCU_2234 | GCU_484108                                      | GC_Urine |
| 2235 | GCU_2235 | GCU_484104                                      | GC_Urine |
| 2236 | GCU_2236 | GCU_483593                                      | GC_Urine |
| 2237 | GCU_2237 | GCU_483487                                      | GC_Urine |
| 2238 | GCU_2238 | GCU_483342                                      | GC_Urine |
