# Supplementary material for: Modulation of the Metabiome by Rifaximin in Patients with Cirrhosis and Minimal Hepatic Encephalopathy
Source: PubMed Central journal article supplement (PMC3615021; doi:10.1371/journal.pone.0060042), 2013-04-02
Supplement: pone.0060042.s005.pdf [file pone.0060042.s005.pdf]

Figure S3

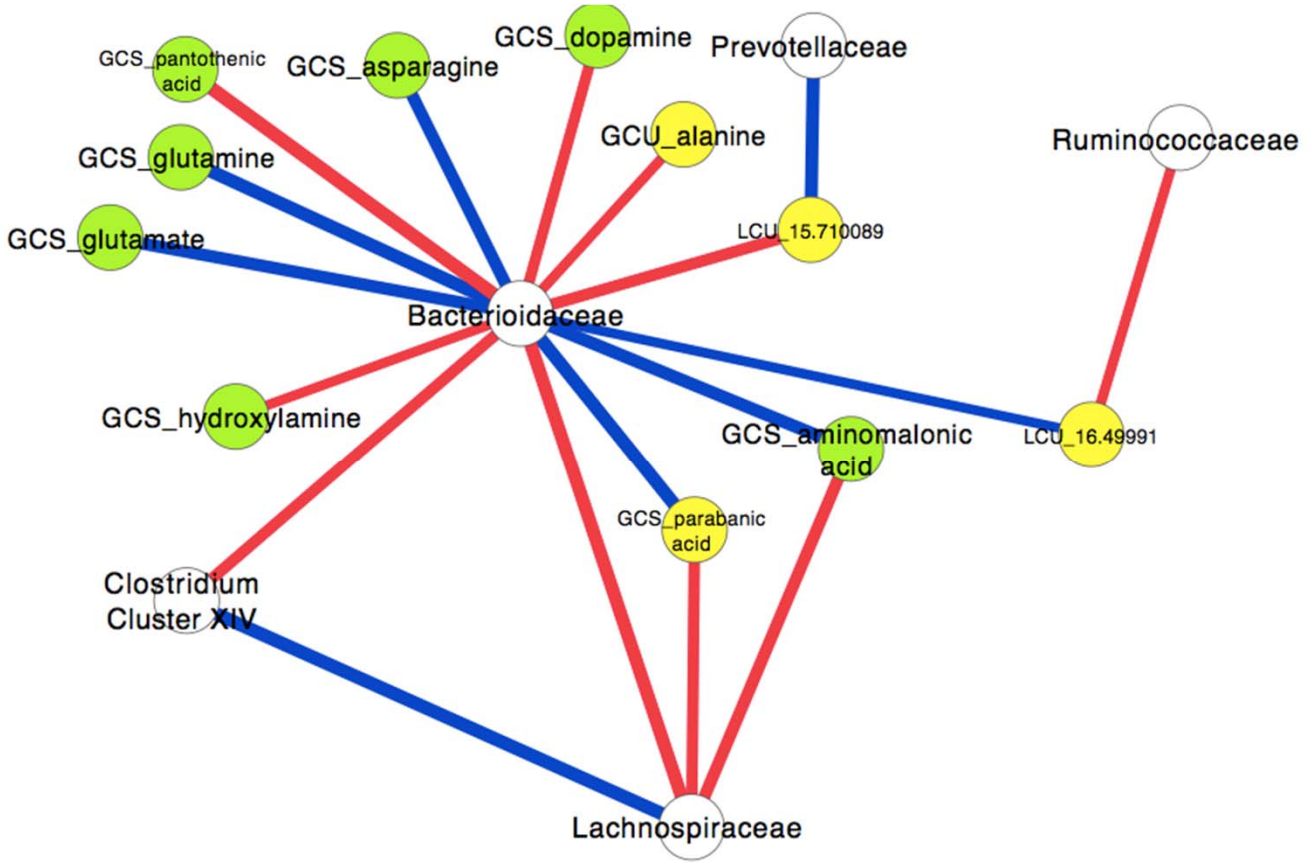

***Bacteroidaceae Before***

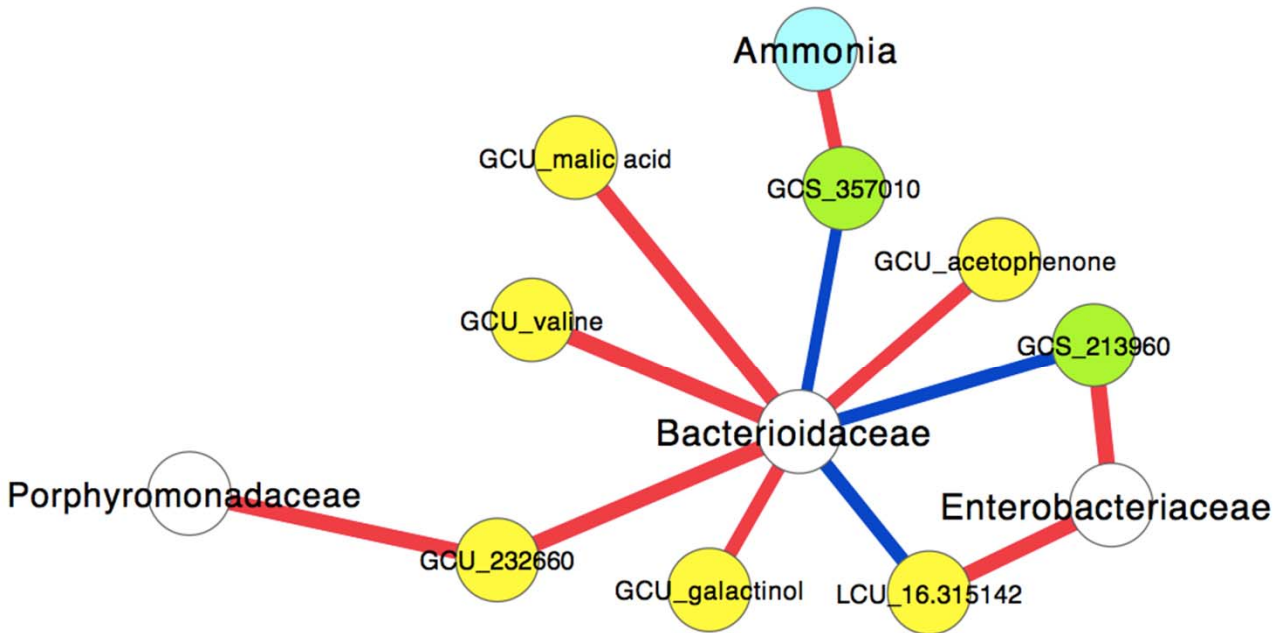

***Bacteroidaceae After***

Figure S4

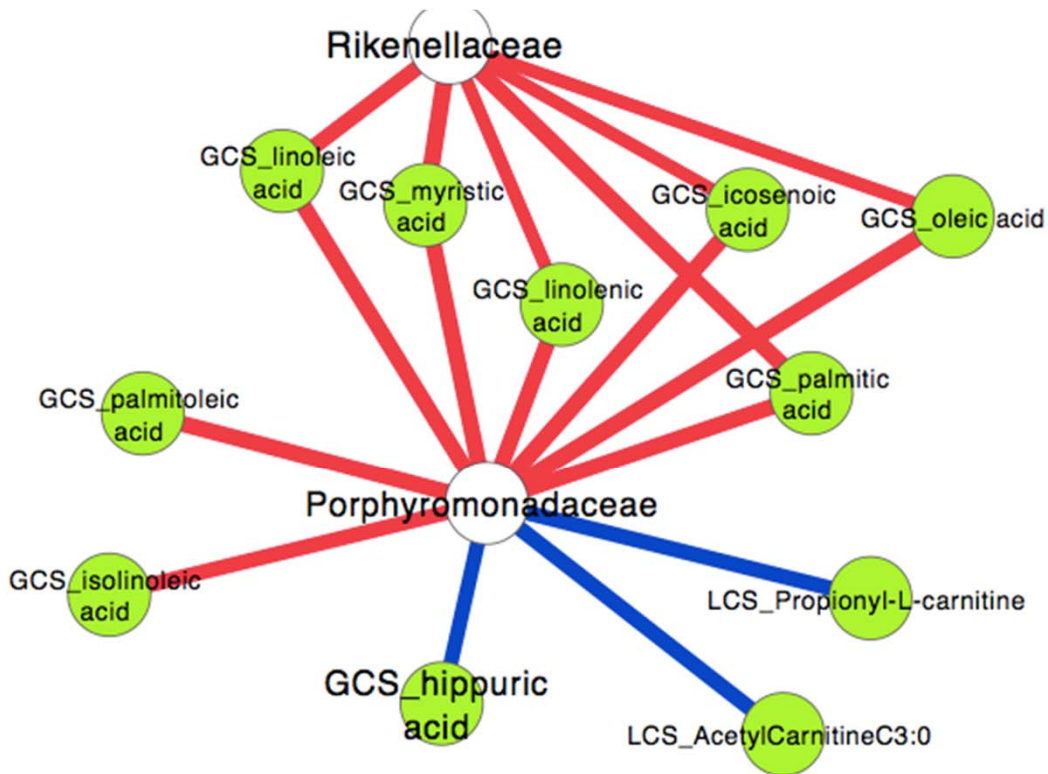

***Porphyromonadaceae Before***

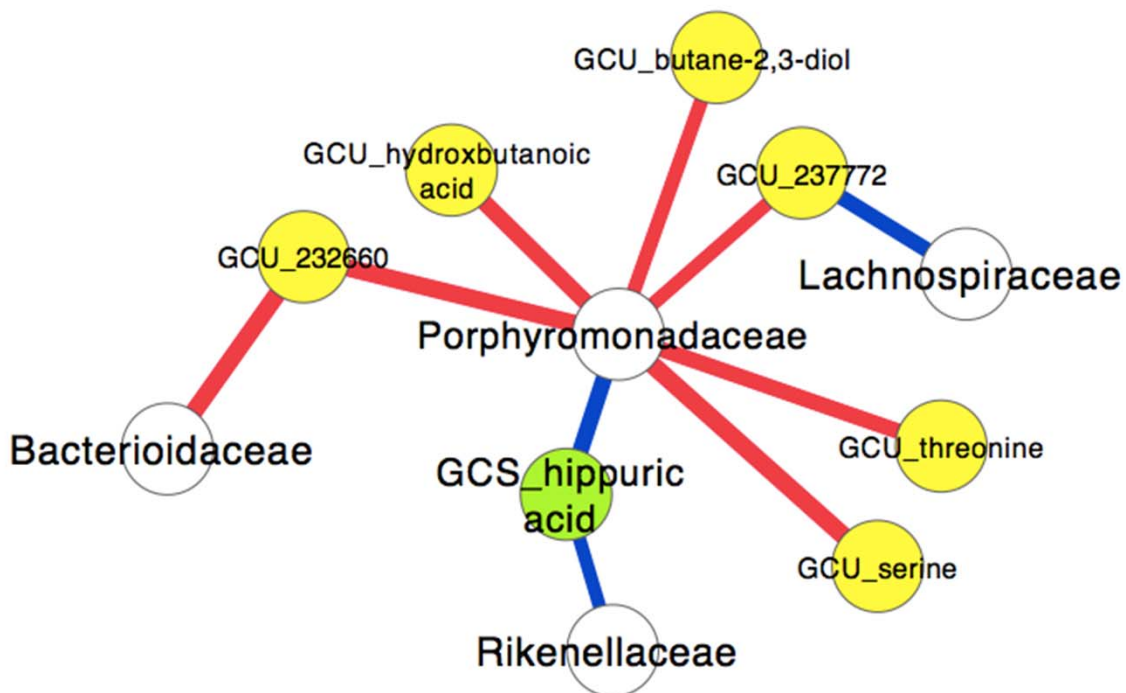

***Porphyromonadaceae After***

Figure S5

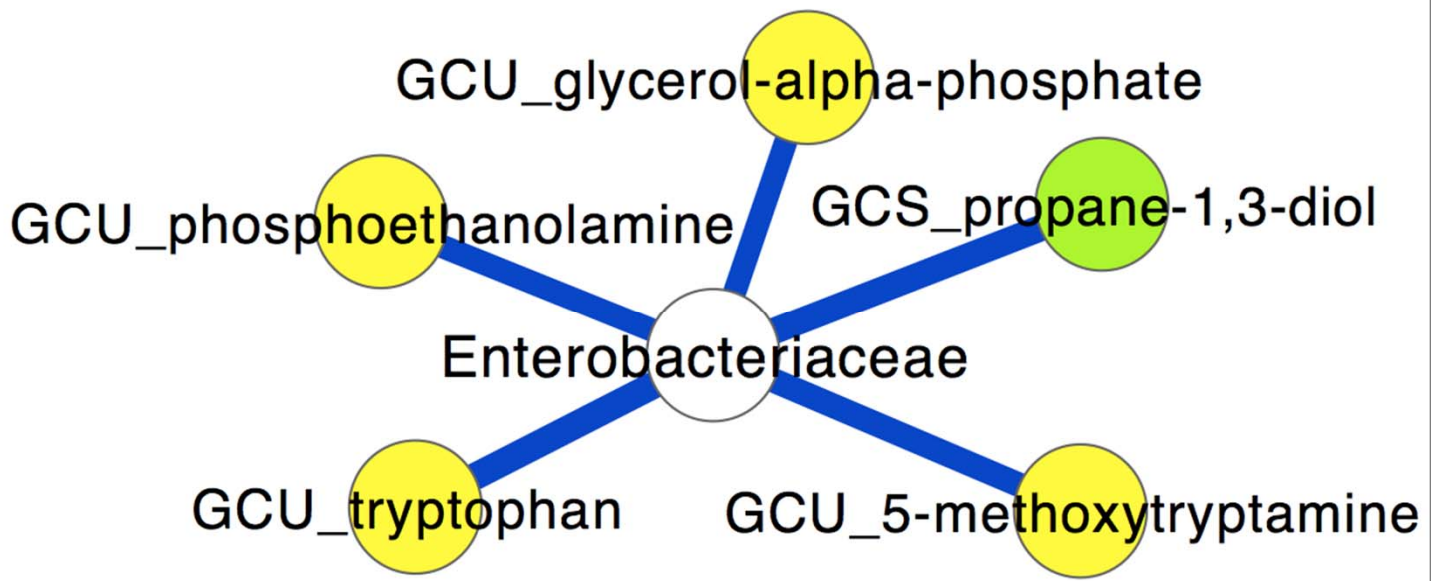

***Enterobacteriaceae Before***

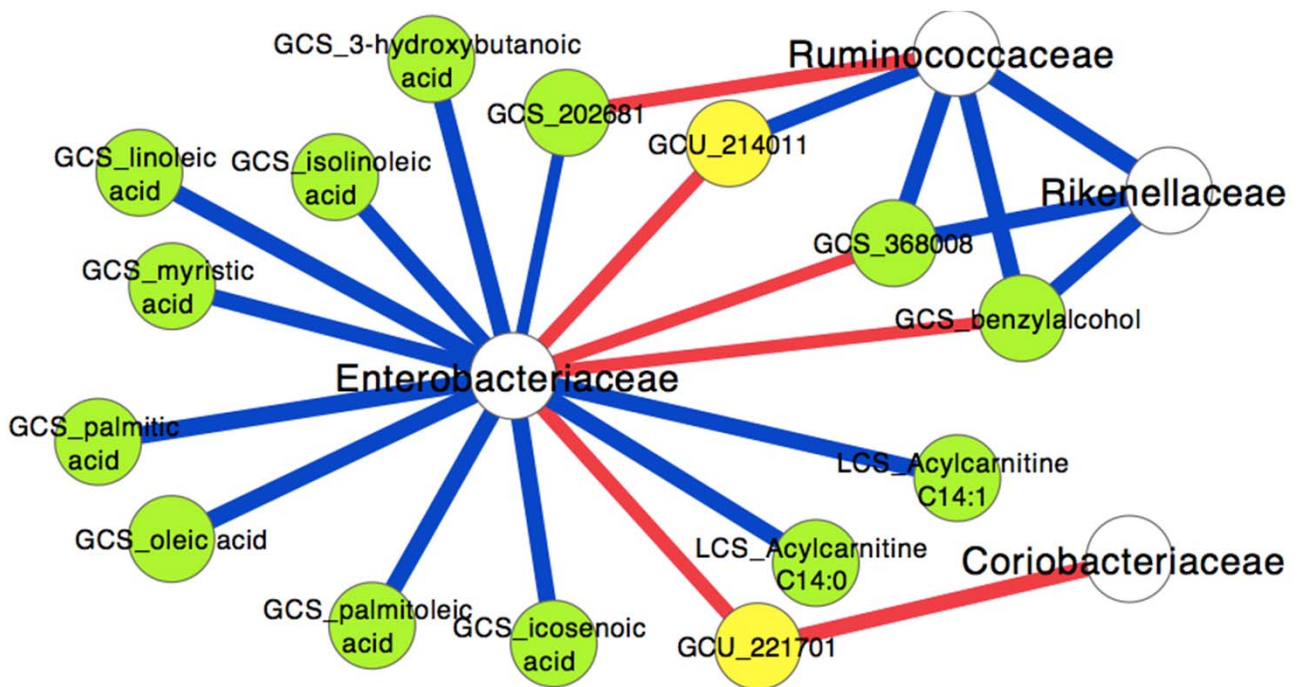

***Enterobacteriaceae After***

Figure S6

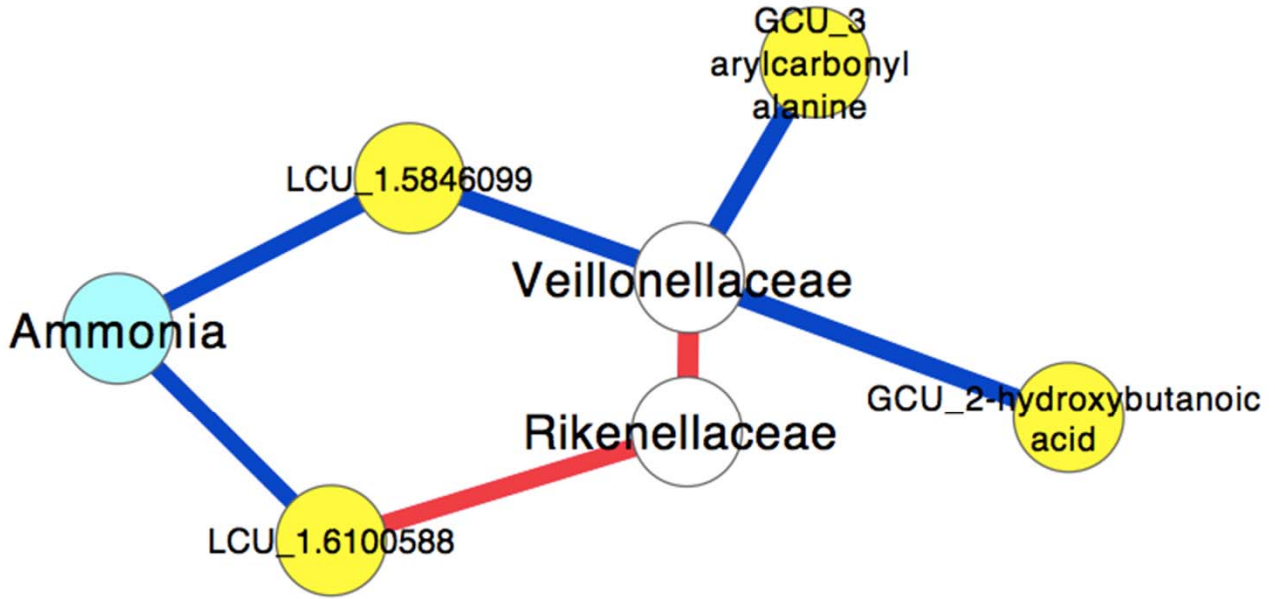

### ***Veillonellaceae* Before**

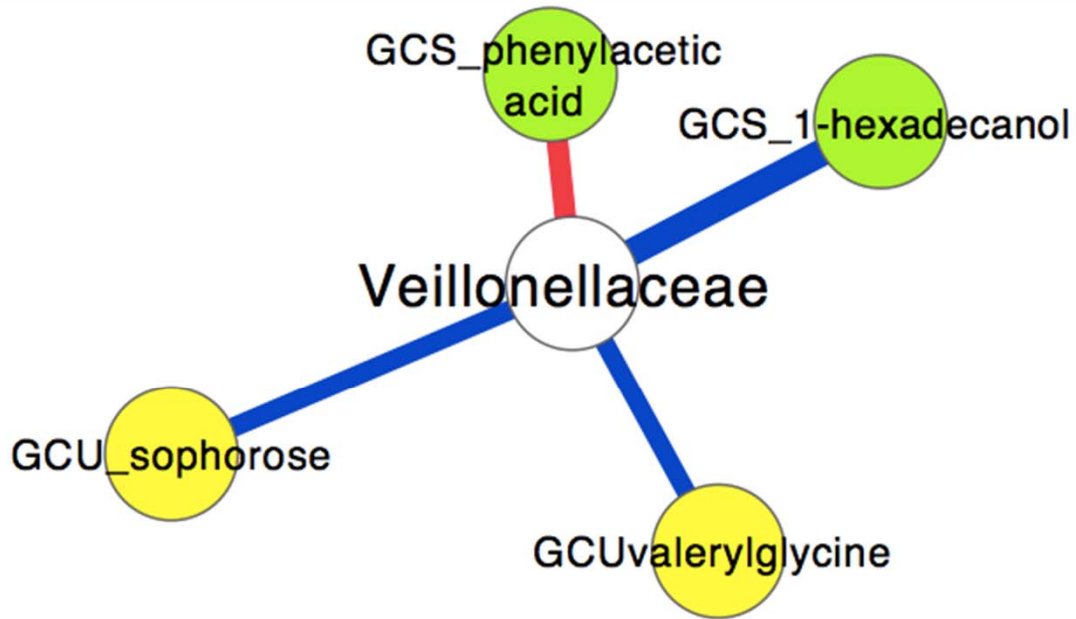

### ***Veillonellaceae* After**

Figure S7

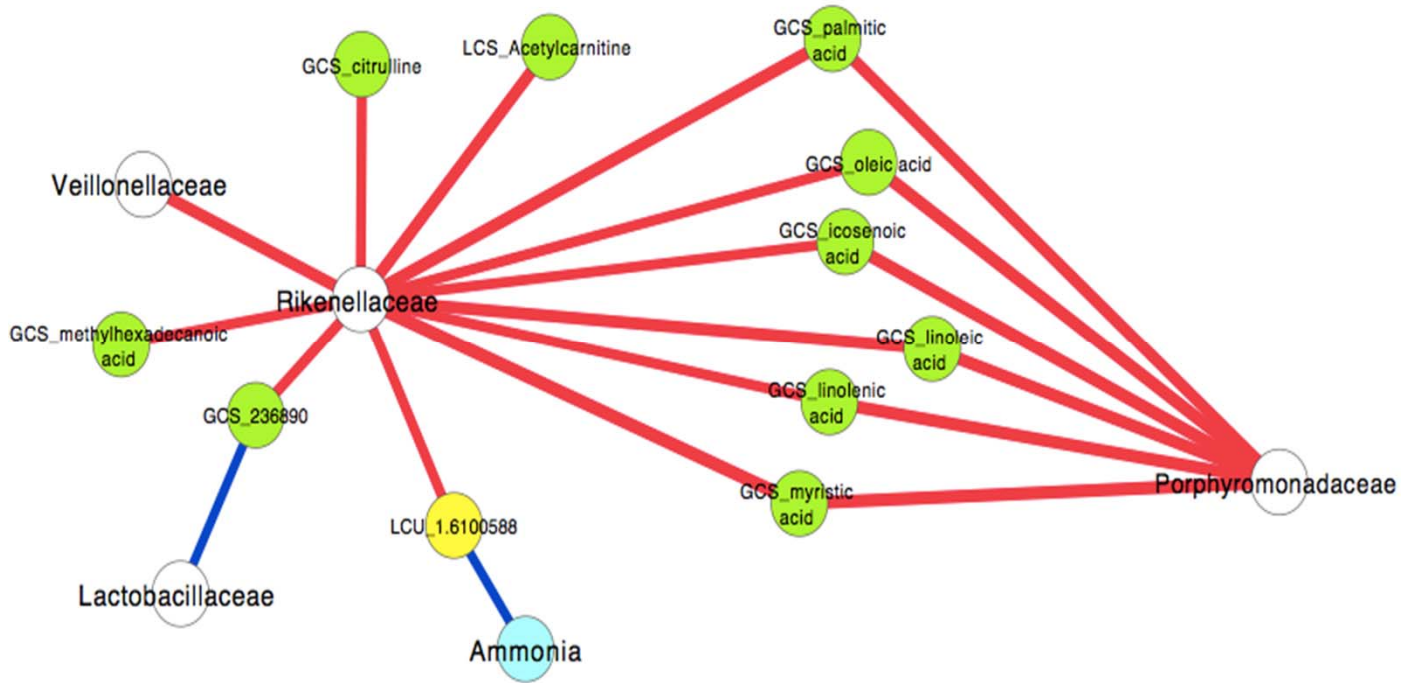

***Rikenellaceae Before***

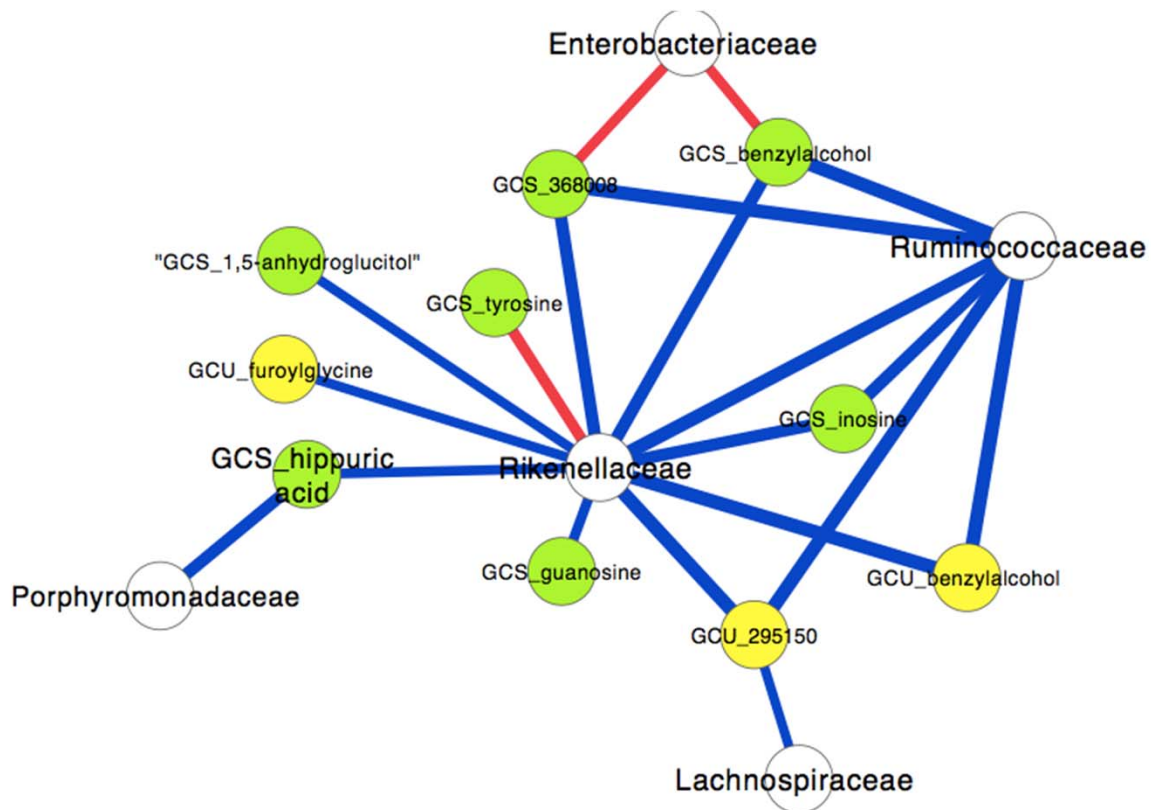

***Rikenellaceae After***
