# Supplementary material for: Modulation of the Metabiome by Rifaximin in Patients with Cirrhosis and Minimal Hepatic Encephalopathy
Source: PubMed Central journal article supplement (PMC3615021; doi:10.1371/journal.pone.0060042), 2013-04-02
Supplement: pone.0060042.s008.pdf [file pone.0060042.s008.pdf]

Protocol Registration Receipt

12/10/2012

Grantor: CDER IND/IDE Number: 77,783 Serial Number: 1

Study of Rifaximin in Minimal Hepatic Encephalopathy

This study has been completed.

|                                              |                                                                      |
|----------------------------------------------|----------------------------------------------------------------------|
| Sponsor:                                     | Hunter Holmes Mcguire Veteran Affairs Medical Center                 |
| Collaborators:                               | Salix Pharmaceuticals                                                |
| Information provided by (Responsible Party): | Jasmohan Bajaj, Hunter Holmes Mcguire Veteran Affairs Medical Center |
| ClinicalTrials.gov Identifier:               | NCT01069133                                                          |

► Purpose

Rifaximin therapy will improve brain functioning on MRI scanning and change the microbiome and metabolome.

| Condition                      | Intervention                       | Phase           |
|--------------------------------|------------------------------------|-----------------|
| Minimal Hepatic Encephalopathy | Drug: Rifaximin<br>Drug: rifaximin | Phase 1/Phase 2 |

Study Type: Interventional

Study Design: Treatment, Single Group Assignment, Open Label, Non-Randomized

Official Title: Effect of Rifaximin Therapy on Brain Activation in Patients With Minimal Hepatic Encephalopathy

Using Functional MR, MR Spectroscopy, Diffusion Tensor Imaging Microbiome and Metabolome: a Prospective Trial

Further study details as provided by Jasmohan Bajaj, Hunter Holmes Mcguire Veteran Affairs Medical Center:

Primary Outcome Measure:

- brain activation on fMRI [Time Frame: 2 months] [Designated as safety issue: No]
- Microbiome constituents [Time Frame: 8 weeks] [Designated as safety issue: No]

Secondary Outcome Measures:

- brain edema and brain metabolite concentration [Time Frame: 2 months] [Designated as safety issue: No]
- Metabolome of urine and serum [Time Frame: 8 weeks] [Designated as safety issue: No]

Enrollment: 20

Study Start Date: February 2010

Study Completion Date: December 2012

Primary Completion Date: May 2012

| Arms                    | Assigned Interventions                                                                                                                   |
|-------------------------|------------------------------------------------------------------------------------------------------------------------------------------|
| Experimental: Rifaximin | Drug: Rifaximin<br>550mg BID open-label<br><br>Other Names:<br>xifaxan<br>Drug: rifaximin<br>550mg PO BID<br><br>Other Names:<br>xifaxan |

 Eligibility

Ages Eligible for Study: 18 Years to 65 Years

Genders Eligible for Study: Both

Inclusion Criteria:

- Age 18-65 years
- cirrhosis diagnosed by clinical or biopsy grounds
- Minimal hepatic encephalopathy defined by impaired performance on at least 2 of the following: number connection tests A/B, digit symbol and block design tests (NCT-A, NCT-B, DST and BDT) compared to age and education-matched controls.
- No contraindications to MRI
- TIPS (transjugular intra-hepatic porto-systemic shunt) procedure or elective surgery planned within the next 8 weeks

Exclusion Criteria:

- Current therapy with lactulose, rifaximin or other treatment for hepatic encephalopathy.
- Prior episodes of overt HE
- MMSE <25
- TIPS placement
- Unable to give informed consent.

- Contra-indications to MRI

## Contacts and Locations

### Locations

United States, Virginia

Hunter Holmes McGuire VA Medical Center  
Richmond, Virginia, United States, 23249

### Investigators

Principal Investigator: Jasmohan S Bajaj, MD, MSc McGuire VA Medical Center

## More Information

Responsible Party: Jasmohan Bajaj, Associate Professor of Medicine, Hunter Holmes  
Mcguire Veteran Affairs Medical Center

Study ID Numbers: BAJAJ010

Health Authority: United States: Food and Drug Administration
